# Supplementary material for: Design, synthesis, molecular docking and in vitro anticancer activities of 1-(4-(benzamido)phenyl)-3-arylurea derivatives
Source: Royal Society of Chemistry journal article supplement (doi:10.1039/d4ra02882a), 2024-01-01
Supplement: d4ra02882a1.pdf [file d4ra02882a1.pdf]

## Electronic Supporting Information

### Design, Synthesis, Molecular docking and *In-vitro* anticancer activities of 1-(4-(benzamido)phenyl)-3-arylurea derivatives

Prafulla Sabale<sup>1\*</sup>, Nusrat Sayyad<sup>1</sup>, Abuzer Ali<sup>2</sup>, Vidya Sabale<sup>3</sup>, Mohammed Kaleem<sup>4\*</sup>, Turkey Omar Asar<sup>5</sup>, Amena Ali<sup>6</sup>, Md. Ali Mujtaba<sup>7</sup>, Md. Khalid Anwer<sup>8</sup>

<sup>1</sup>Department of Pharmaceutical Sciences, Rashtrasant Tukadoji Maharaj Nagpur University, Mahatma Jyotiba Fuley Shaikshanik Parisar, Nagpur-440033, India; [prafullasable@yahoo.com](mailto:prafullasable@yahoo.com); [nusratsayyad11@gmail.com](mailto:nusratsayyad11@gmail.com)

<sup>2</sup>Department of Pharmacognosy, College of Pharmacy, Taif University, P.O. Box 11099, Taif 21944, Saudi Arabia; [abuali@tu.edu.sa](mailto:abuali@tu.edu.sa)

<sup>3</sup>Department of Pharmaceutics, Dadasaheb Balpande College of Pharmacy, Rashtrasant Tukadoji Maharaj Nagpur University, Nagpur, Maharashtra, 440037, India; [vidyasabale@gmail.com](mailto:vidyasabale@gmail.com)

<sup>4</sup>Department of Pharmacology, Dadasaheb Balpande College of Pharmacy, Rashtrasant Tukadoji Maharaj Nagpur University, Nagpur, Maharashtra, 440037, India; [kaleemmubin88@gmail.com](mailto:kaleemmubin88@gmail.com)

<sup>5</sup>Department of Biology, College of Science and Arts at Alkamil, University of Jeddah, Saudi Arabia, [tasar@uj.edu.sa](mailto:tasar@uj.edu.sa)

<sup>6</sup>Department of Pharmaceutical Chemistry, College of Pharmacy, Taif University, P.O. Box 11099, Taif 21944 Saudi Arabia; [amrathore@tu.edu.sa](mailto:amrathore@tu.edu.sa)

<sup>7</sup>Department of Pharmaceutics, Faculty of Pharmacy, Northern Border University, Arar, Saudi Arabia; [M.Mujtaba@nbu.edu.sa](mailto:M.Mujtaba@nbu.edu.sa)

<sup>8</sup>Department of Pharmaceutics, College of Pharmacy, Prince Sattam Bin Abdulaziz University, P.O. Box 173, Al-Kharj 11942, Saudi Arabia; [m.anwer@psau.edu.sa](mailto:m.anwer@psau.edu.sa)

| <b>Figure</b>                                               | <b>Page No.</b> |
|-------------------------------------------------------------|-----------------|
| <b>Figure S1. FTIR spectrum of compound 6a</b>              | <b>4</b>        |
| <b>Figure S2. <sup>1</sup>HNMR spectrum of compound 6a</b>  | <b>6</b>        |
| <b>Figure S3. Mass spectrum of compound 6a</b>              | <b>7</b>        |
| <b>Figure S4. FTIR spectrum of compound 6b</b>              | <b>8</b>        |
| <b>Figure S5. <sup>1</sup>HNMR spectrum of compound 6b</b>  | <b>10</b>       |
| <b>Figure S6. Mass spectrum of compound 6b</b>              | <b>11</b>       |
| <b>Figure S7. FTIR spectrum of compound 6c</b>              | <b>12</b>       |
| <b>Figure S8. <sup>1</sup>HNMR spectrum of compound 6c</b>  | <b>14</b>       |
| <b>Figure S9. Mass spectrum of compound 6c</b>              | <b>15</b>       |
| <b>Figure S10. FTIR spectrum of compound 6d</b>             | <b>16</b>       |
| <b>Figure S11. <sup>1</sup>HNMR spectrum of compound 6d</b> | <b>18</b>       |
| <b>Figure S12. Mass spectrum of compound 6d</b>             | <b>19</b>       |
| <b>Figure S13. FTIR spectrum of compound 6e</b>             | <b>20</b>       |
| <b>Figure S14. <sup>1</sup>HNMR spectrum of compound 6e</b> | <b>22</b>       |

|                                                               |           |
|---------------------------------------------------------------|-----------|
| <b>Figure S15. Mass spectrum of compound 6e</b>               | <b>23</b> |
| <b>Figure S16. FTIR spectrum of compound 6f</b>               | <b>24</b> |
| <b>Figure S17. <sup>1</sup>H NMR spectrum of compound 6f</b>  | <b>26</b> |
| <b>Figure S18. Mass spectrum of compound 6f</b>               | <b>27</b> |
| <b>Figure S19. FTIR spectrum of compound 6g</b>               | <b>28</b> |
| <b>Figure S20. <sup>1</sup>H NMR spectrum of compound 6g</b>  | <b>30</b> |
| <b>Figure S21. <sup>13</sup>C NMR spectrum of compound 6g</b> | <b>31</b> |
| <b>Figure S22. Mass spectrum of compound 6g</b>               | <b>32</b> |

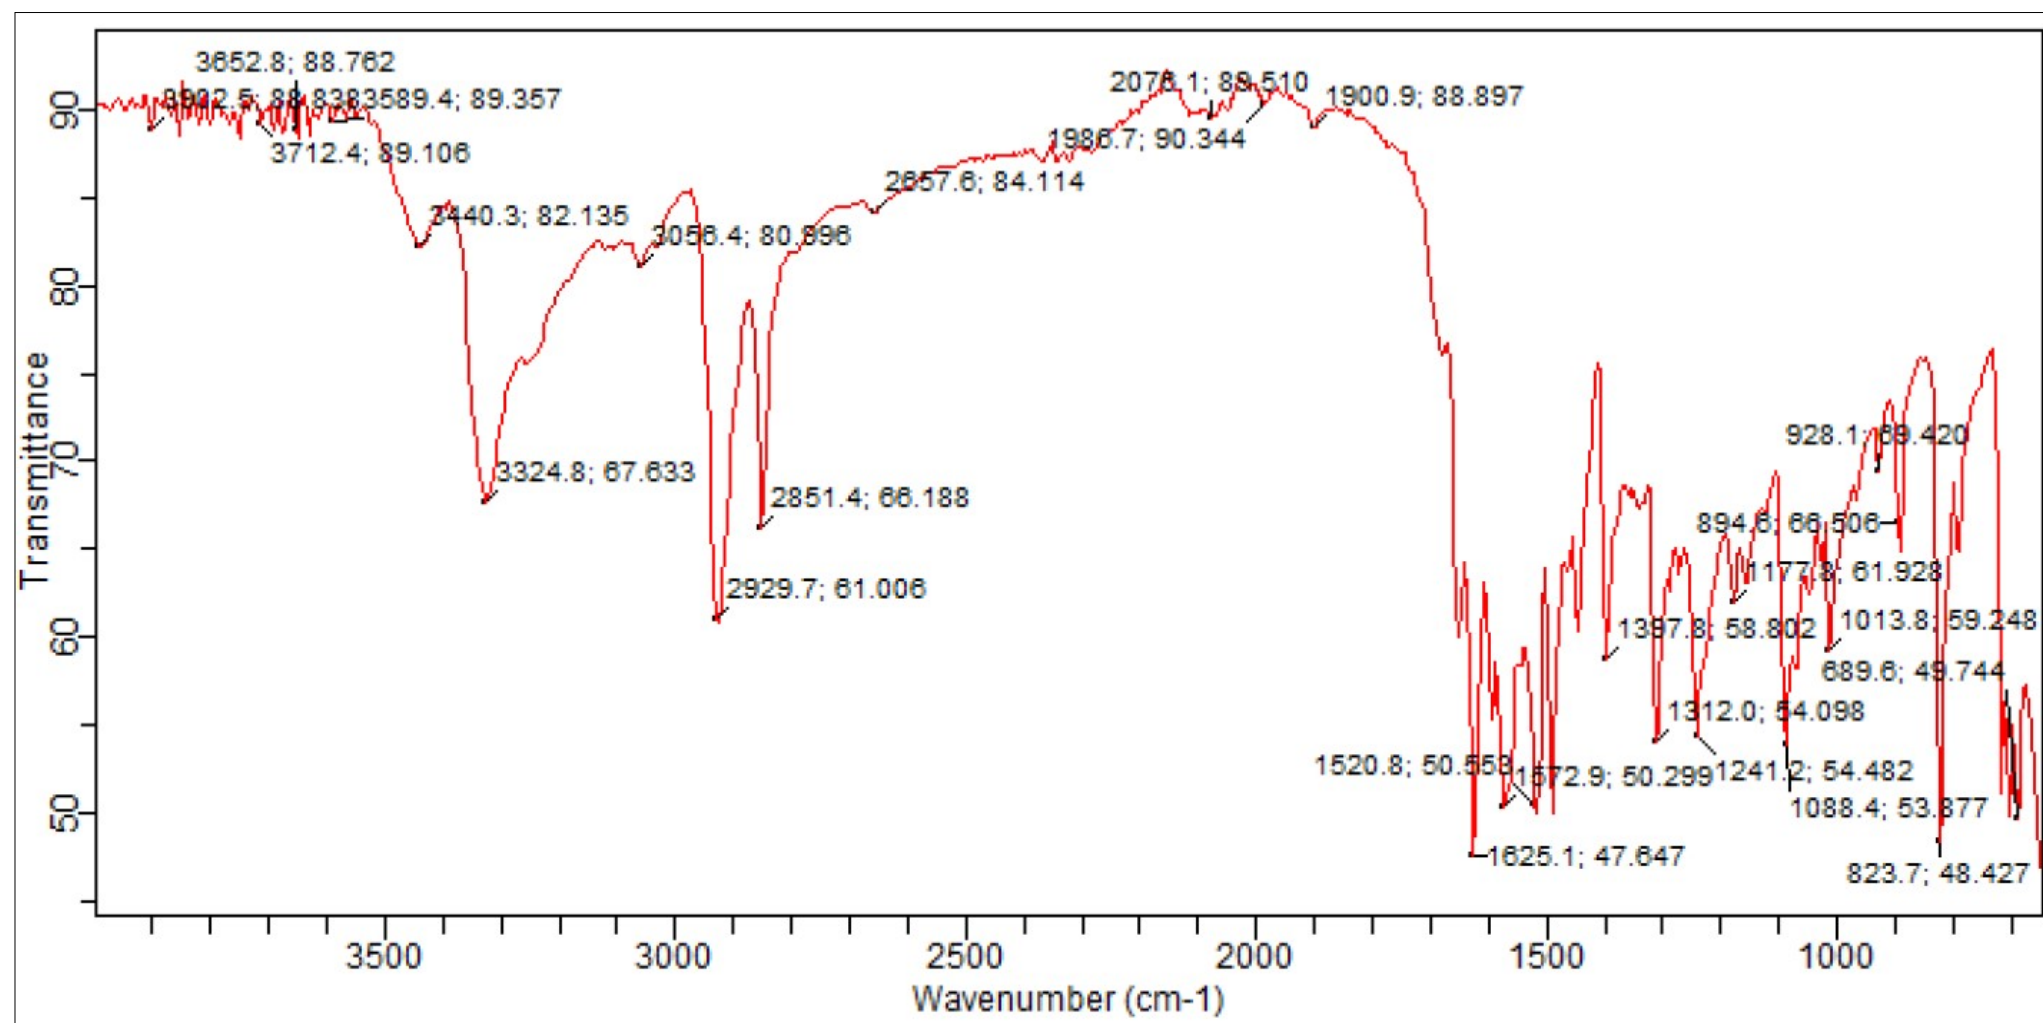

Figure S1. FTIR spectrum of compound 6a

**Interpretation:**

| Structure                                                                                                                                | Functional Group       | Standard Values | Observed Values     |
|------------------------------------------------------------------------------------------------------------------------------------------|------------------------|-----------------|---------------------|
| 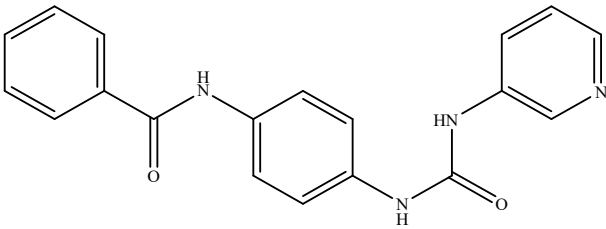<br><chem>O=C(Nc1ccc(NC(=O)c2ccncc2)cc1)c3ccccc3</chem> | N-H stretching         | 3350-3310       | 3324.8              |
|                                                                                                                                          | C-N stretching (Ar)    | 1342-1266       | 1241.2              |
|                                                                                                                                          | N-H bending            | 1650-1580       | 1520.8              |
|                                                                                                                                          | C=N stretching         | 1690-1640       | 1672.9              |
|                                                                                                                                          | C=O stretching (amide) | 1690            | 1625.1              |
|                                                                                                                                          | aromatic C-H bending   | 900-700         | 823.7, 689.6, 894.6 |

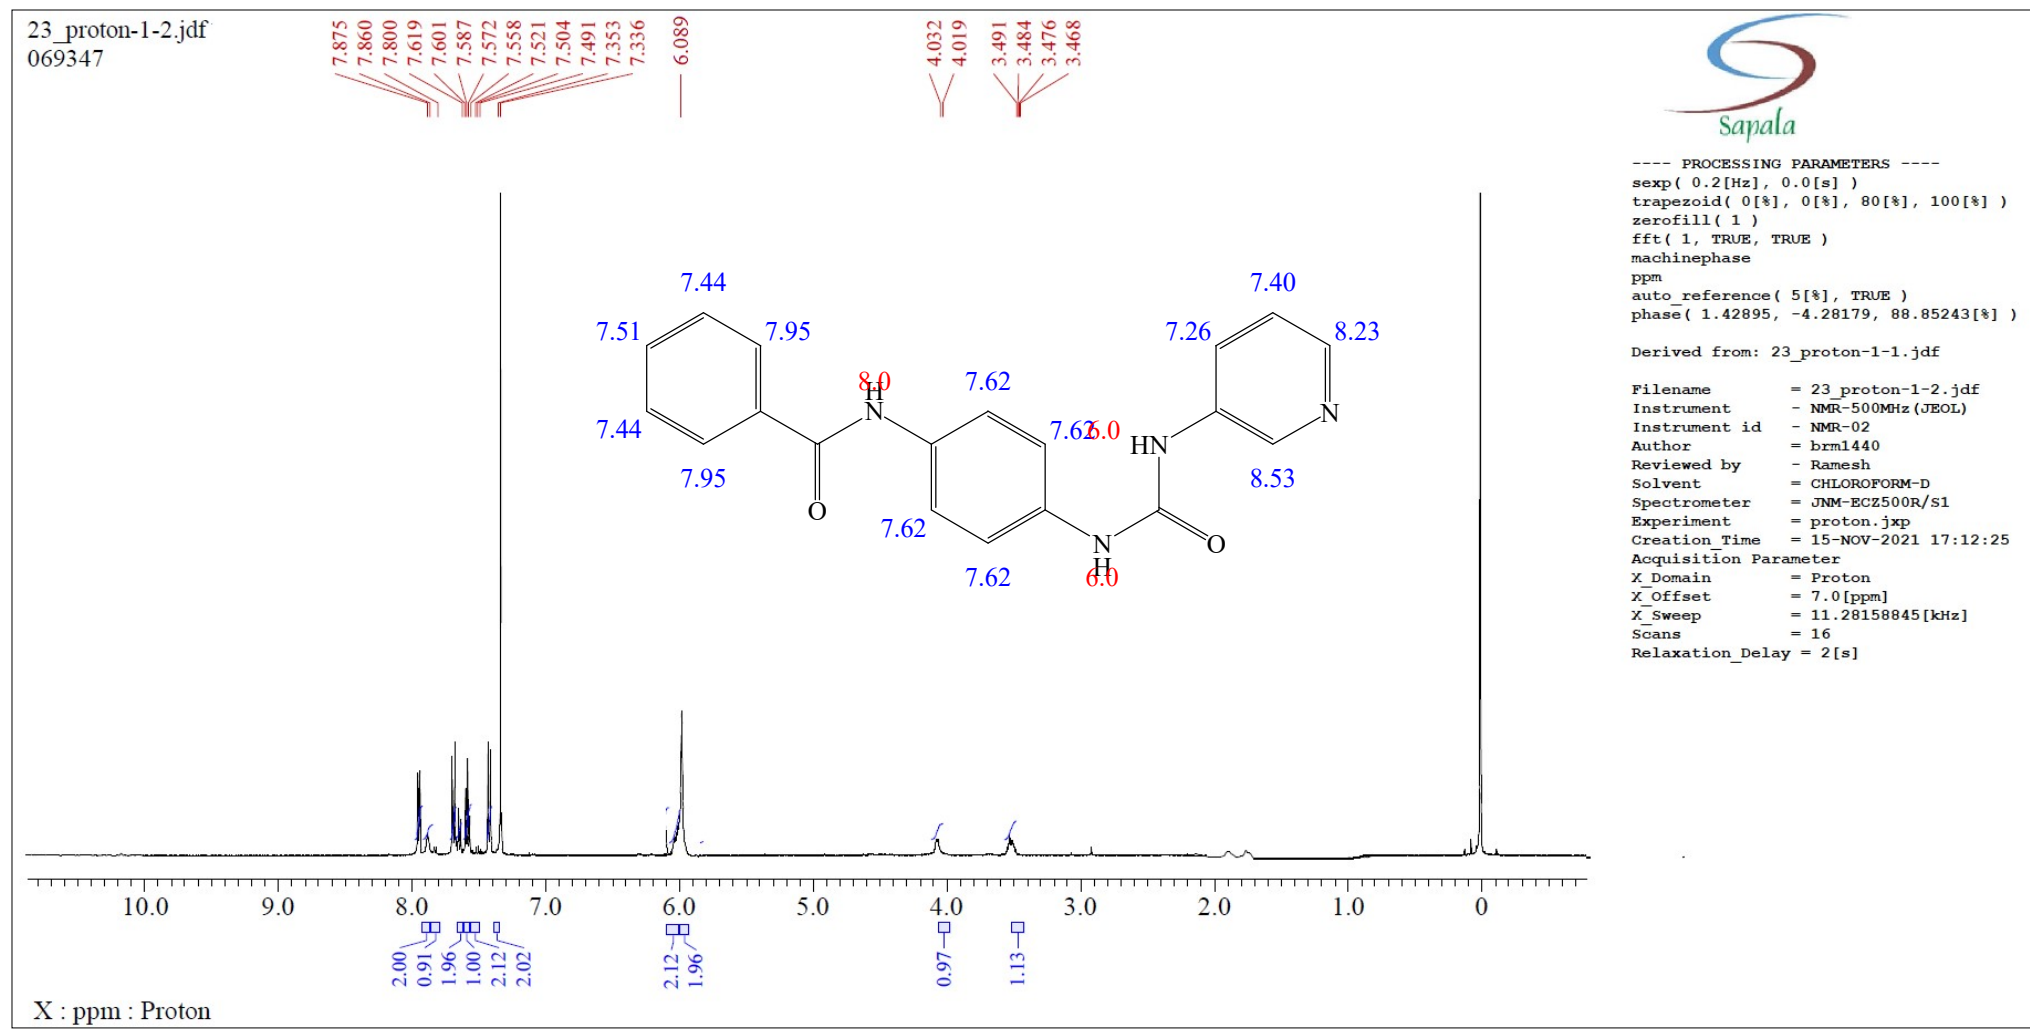

Figure S2. <sup>1</sup>H NMR spectrum of compound 6a

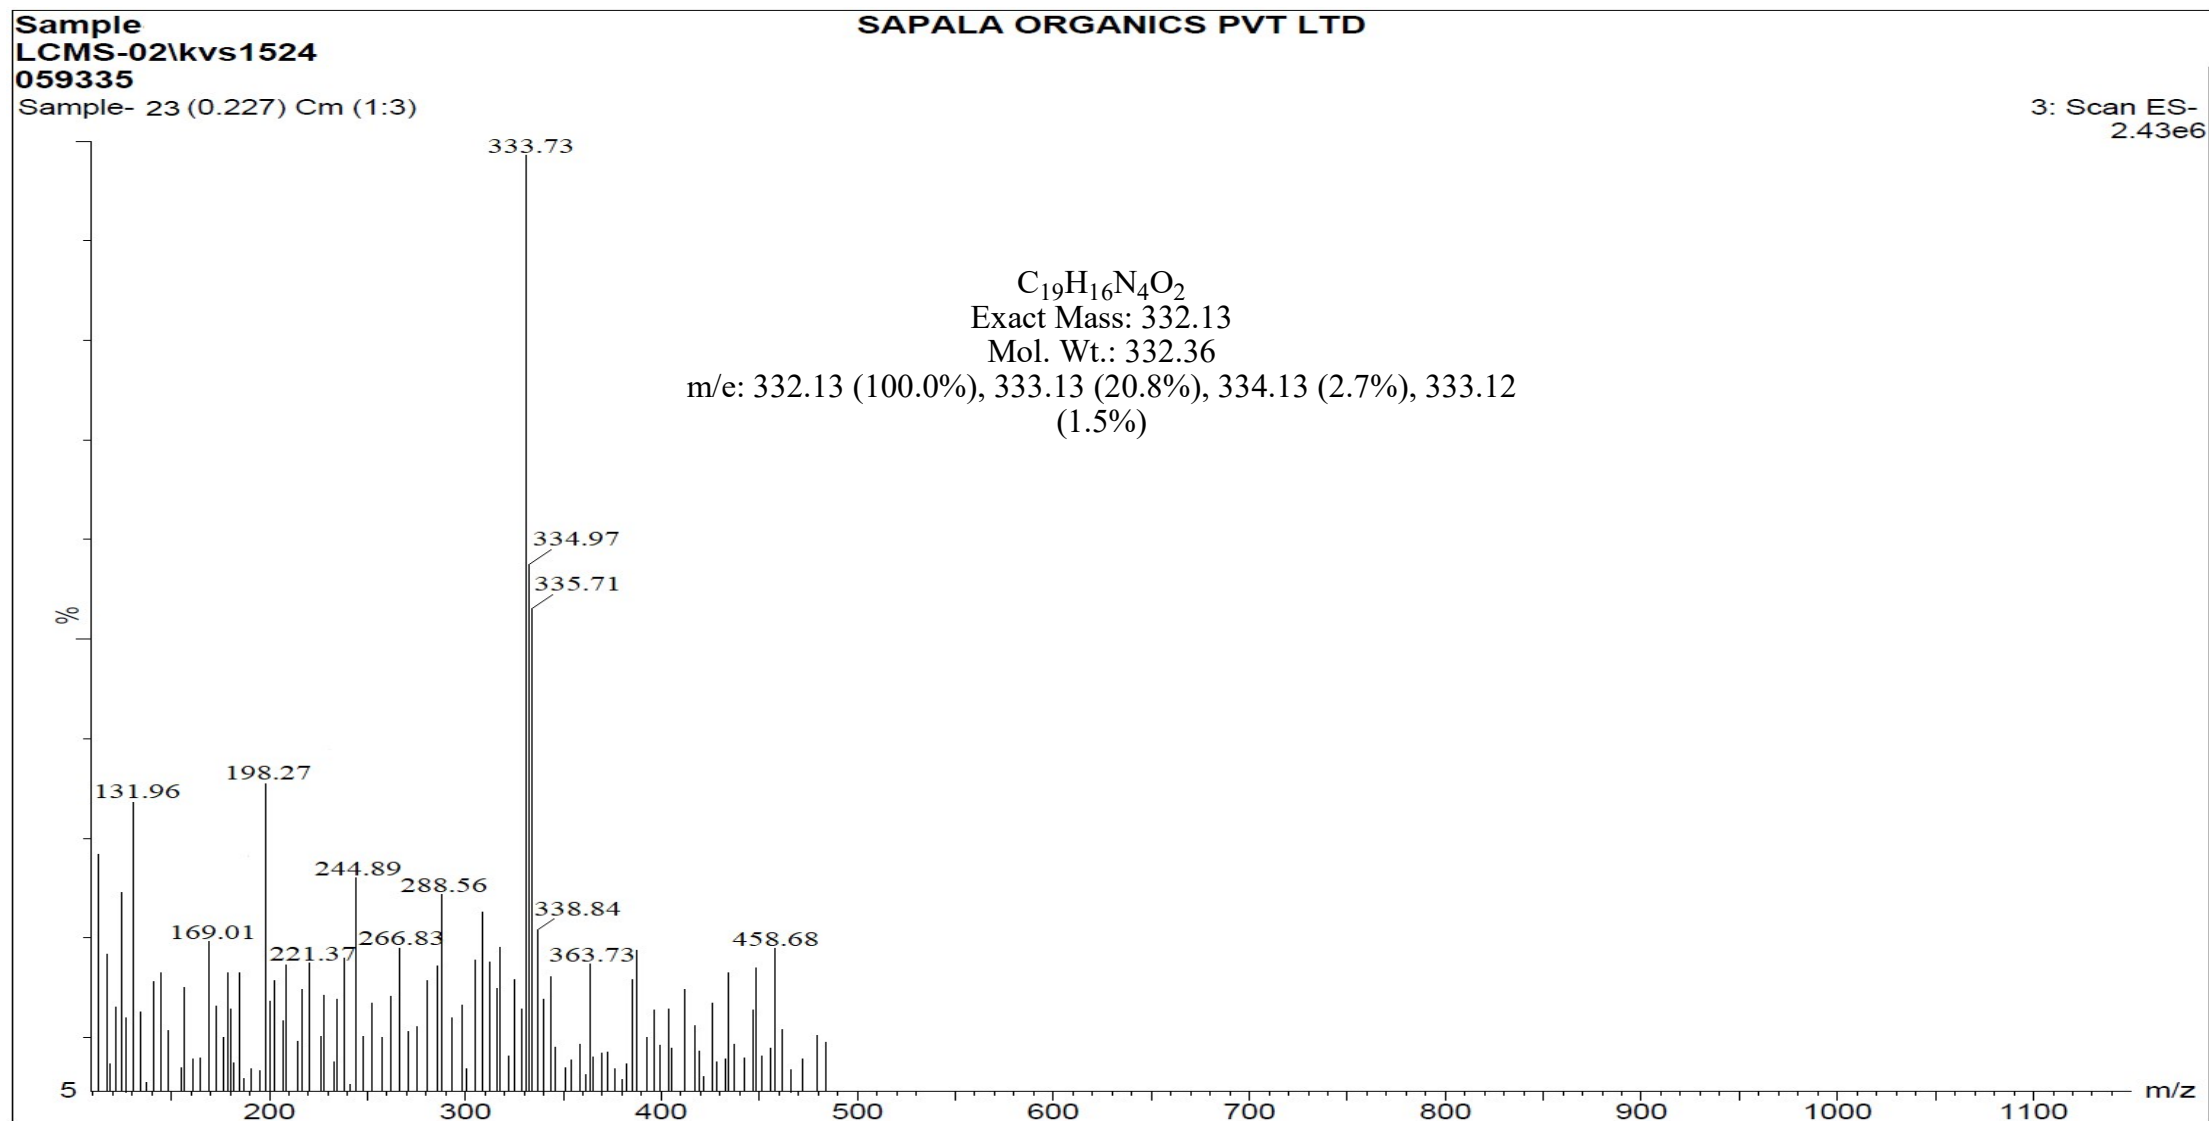

Figure S3. Mass spectrum of compound 6a

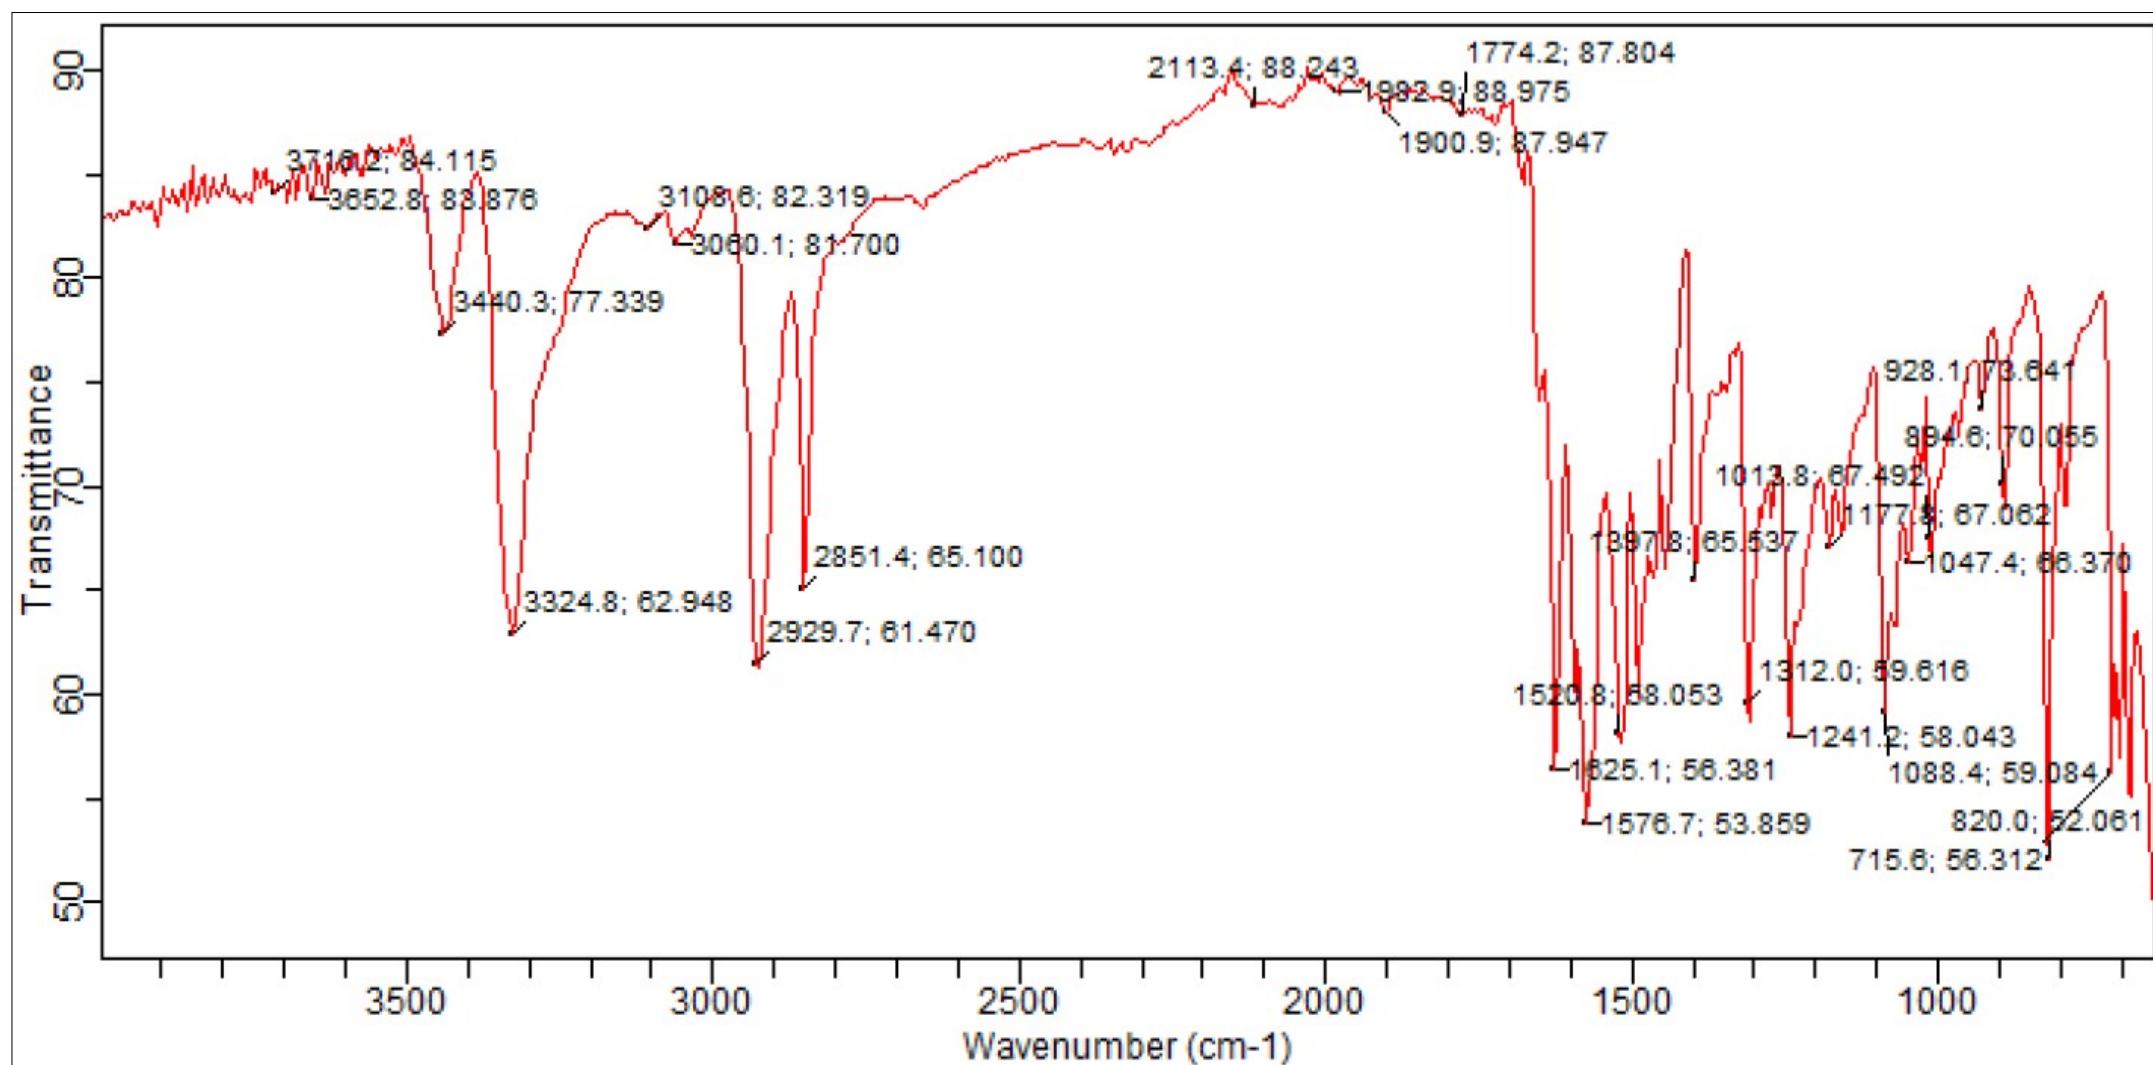

Figure S4. FTIR spectrum of compound 6b



**Interpretation:**

| Structure                                                                                                                                | Functional Group       | Standard Values | Observed Values     |
|------------------------------------------------------------------------------------------------------------------------------------------|------------------------|-----------------|---------------------|
| 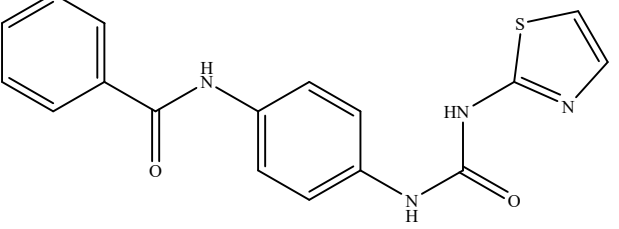<br><chem>O=C(Nc1ccc(NC(=O)c2ccnsc2)cc1)c3ccccc3</chem> | N-H stretching         | 3350-3310       | 3324.8              |
|                                                                                                                                          | C-N stretching (Ar)    | 1342-1266       | 1312.0              |
|                                                                                                                                          | N-H bending            | 1650-1580       | 1576.7              |
|                                                                                                                                          | C=N stretching         | 1690-1640       | 1672.9              |
|                                                                                                                                          | C=O stretching (amide) | 1690            | 1625.1              |
|                                                                                                                                          | aromatic C-H bending   | 900-700         | 820.0, 715.6, 894.6 |

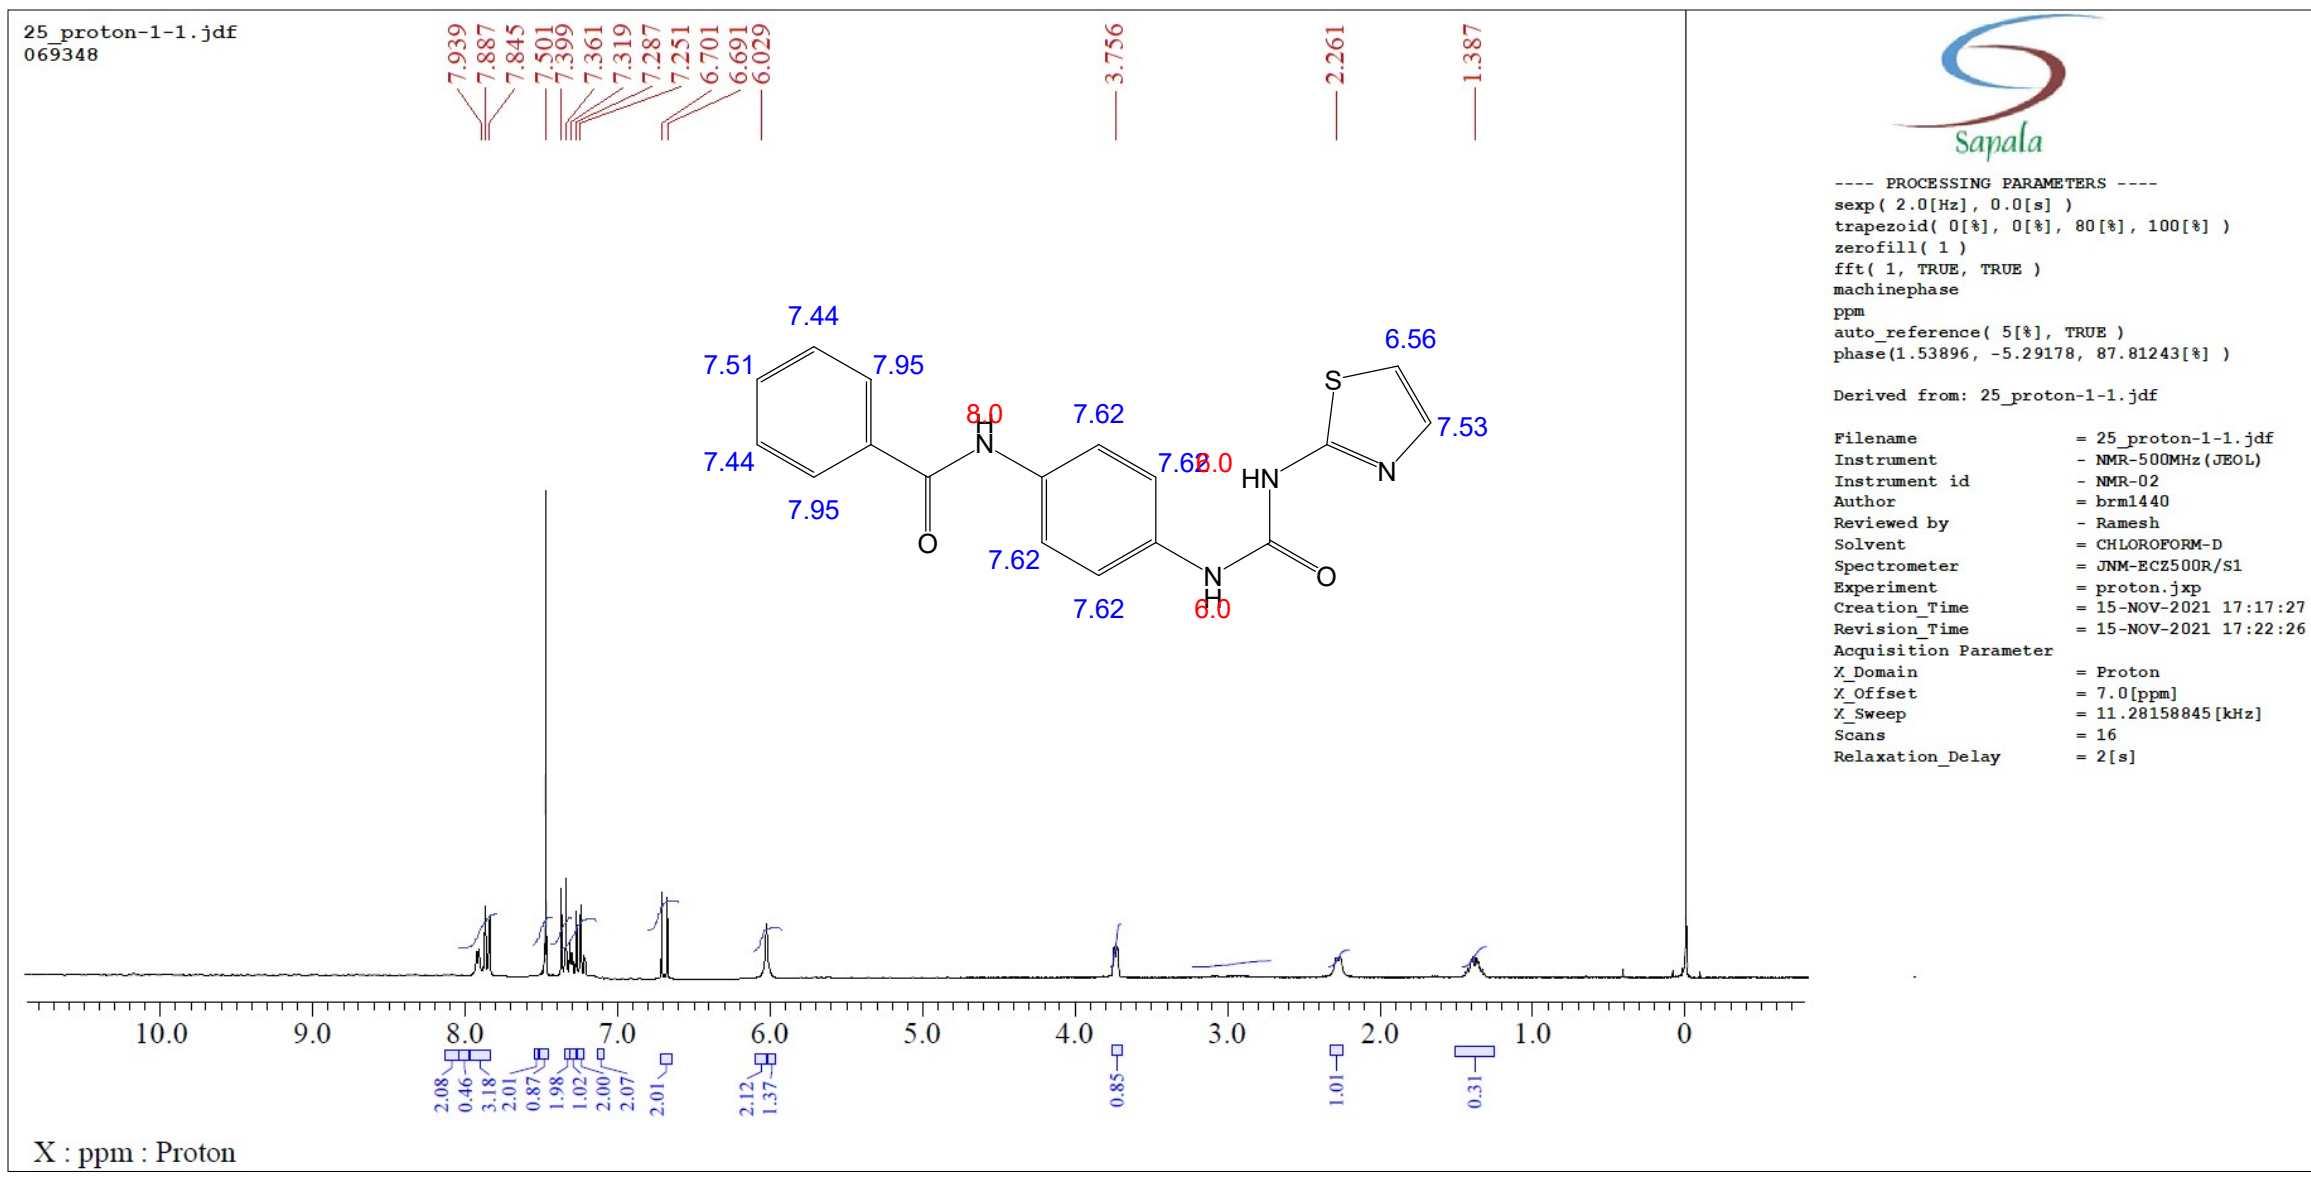

Figure S5. <sup>1</sup>HNMR spectrum of compound 6b

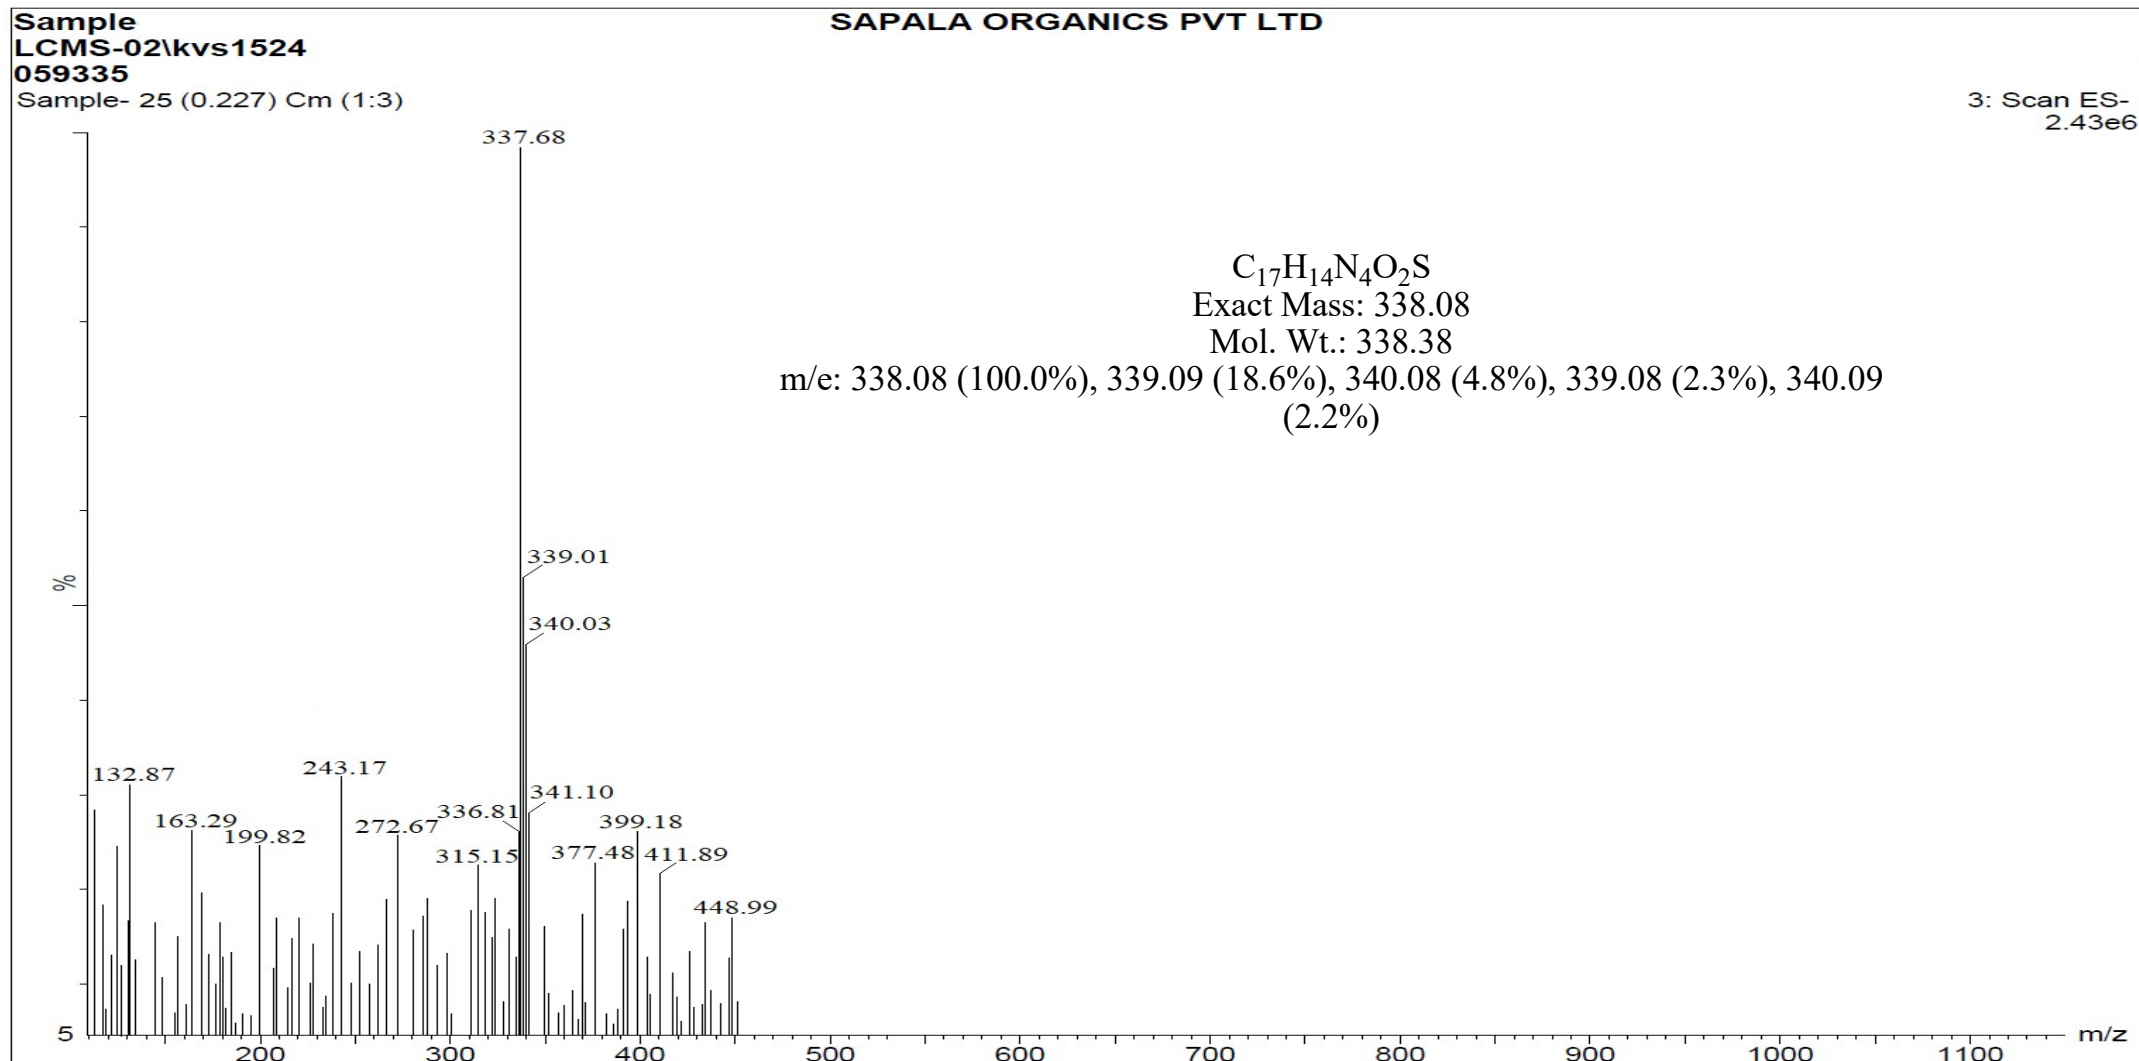

Figure S6. Mass spectrum of compound 6b

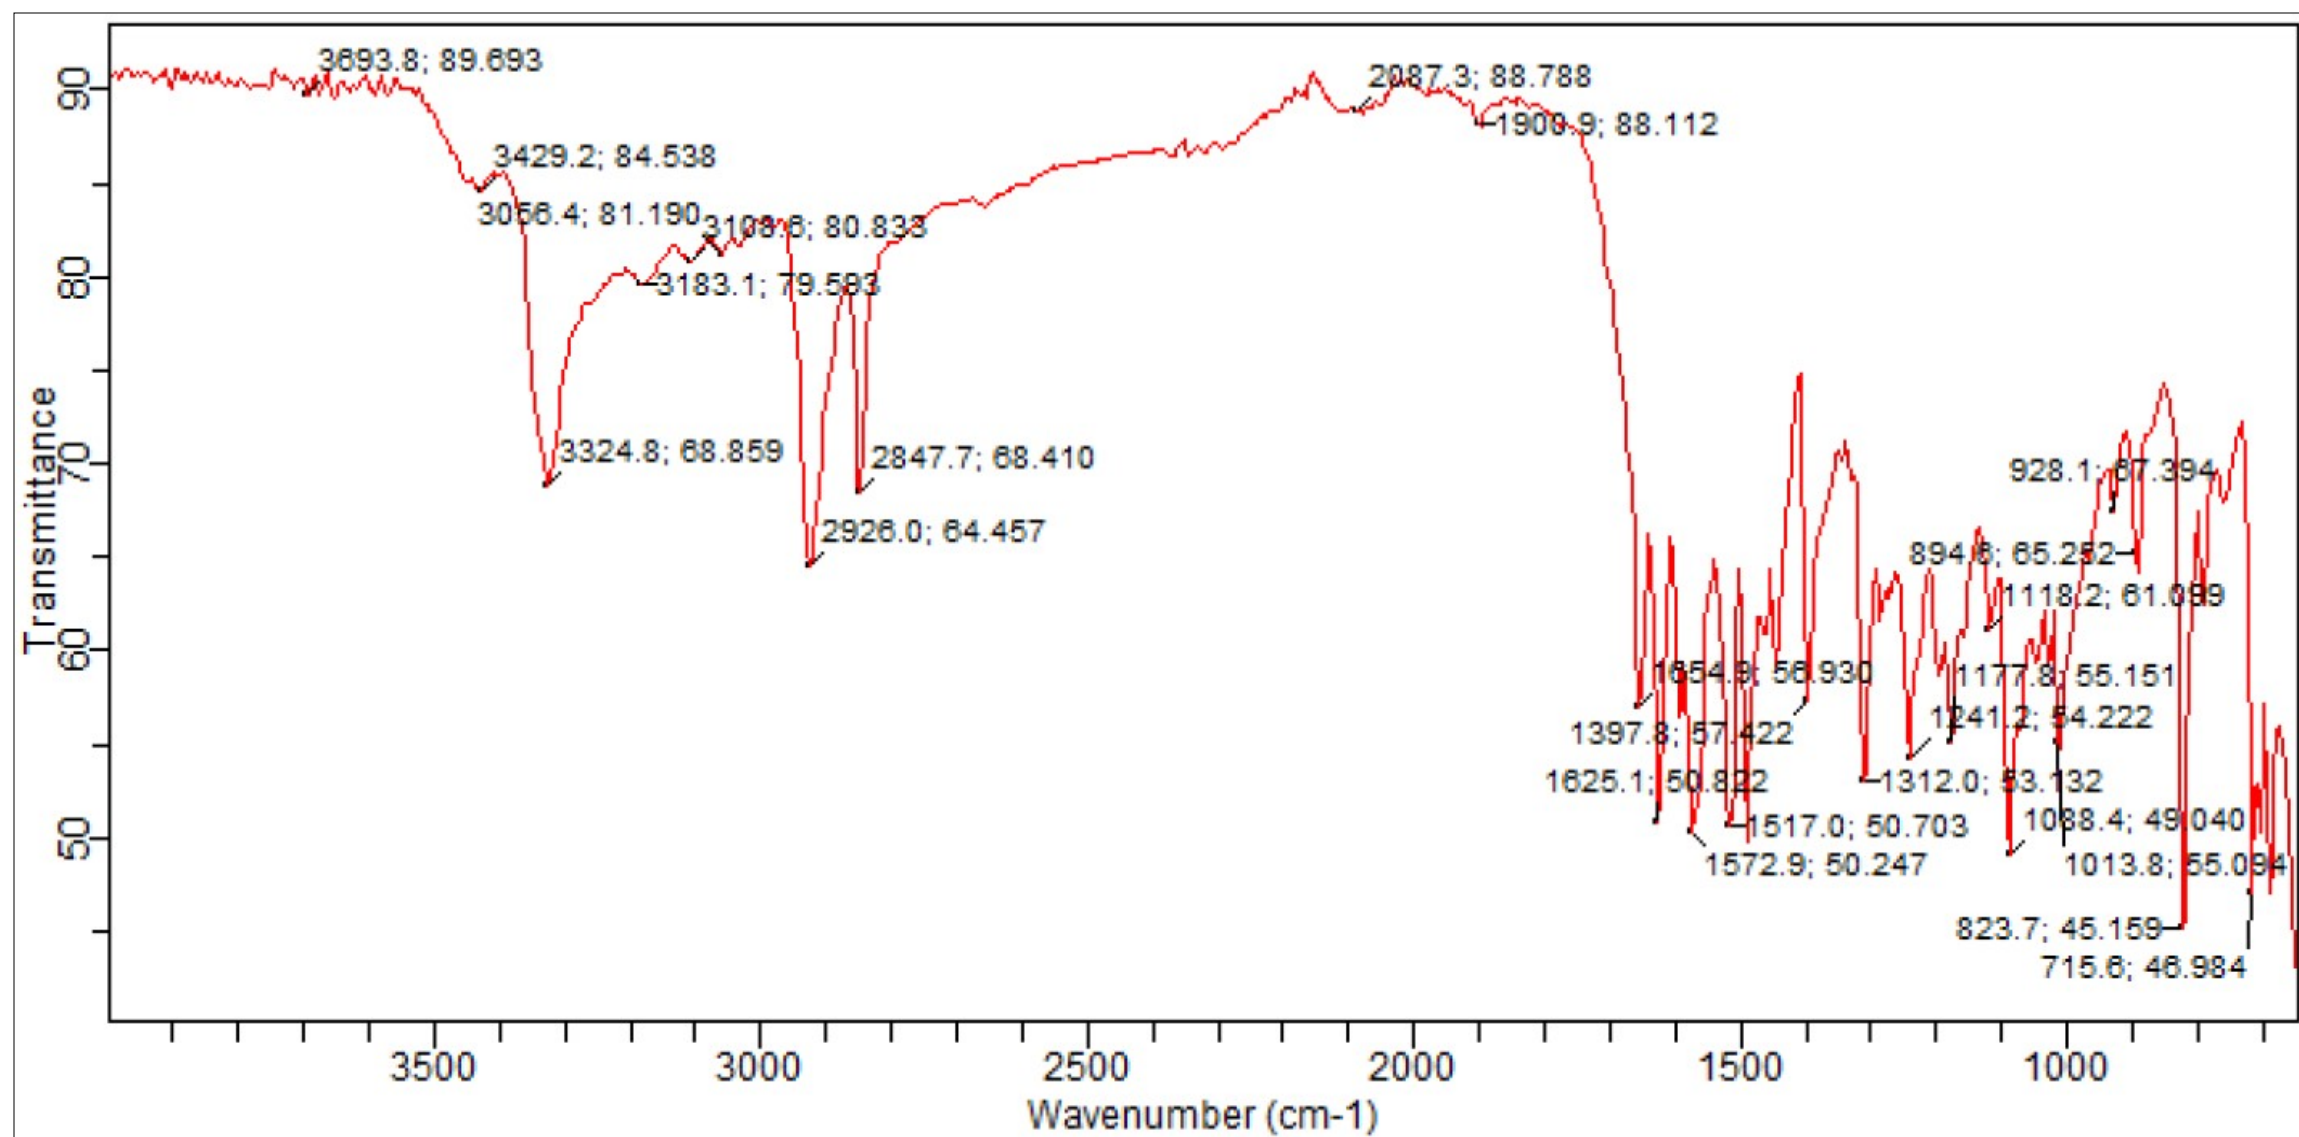

Figure S7. FTIR spectrum of compound 6c

**Interpretation:**

| Structure                                                                         | Functional Group       | Standard Values | Observed Values     |
|-----------------------------------------------------------------------------------|------------------------|-----------------|---------------------|
| 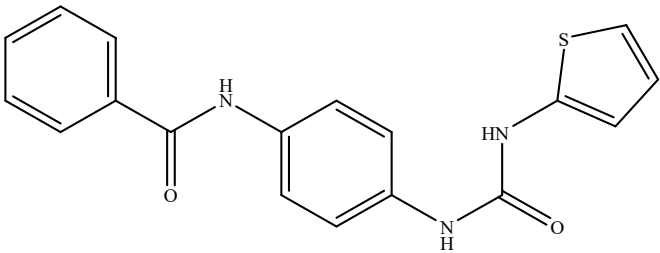 | N-H stretching         | 3350-3310       | 3324.8              |
|                                                                                   | C-N stretching (Ar)    | 1342-1266       | 1312.0              |
|                                                                                   | N-H bending            | 1650-1580       | 1572.9              |
|                                                                                   | C=N stretching         | 1690-1640       | 1654.9              |
|                                                                                   | C=O stretching (amide) | 1690            | 1625.1              |
|                                                                                   | aromatic C-H bending   | 900-700         | 823.7, 894.6, 715.6 |

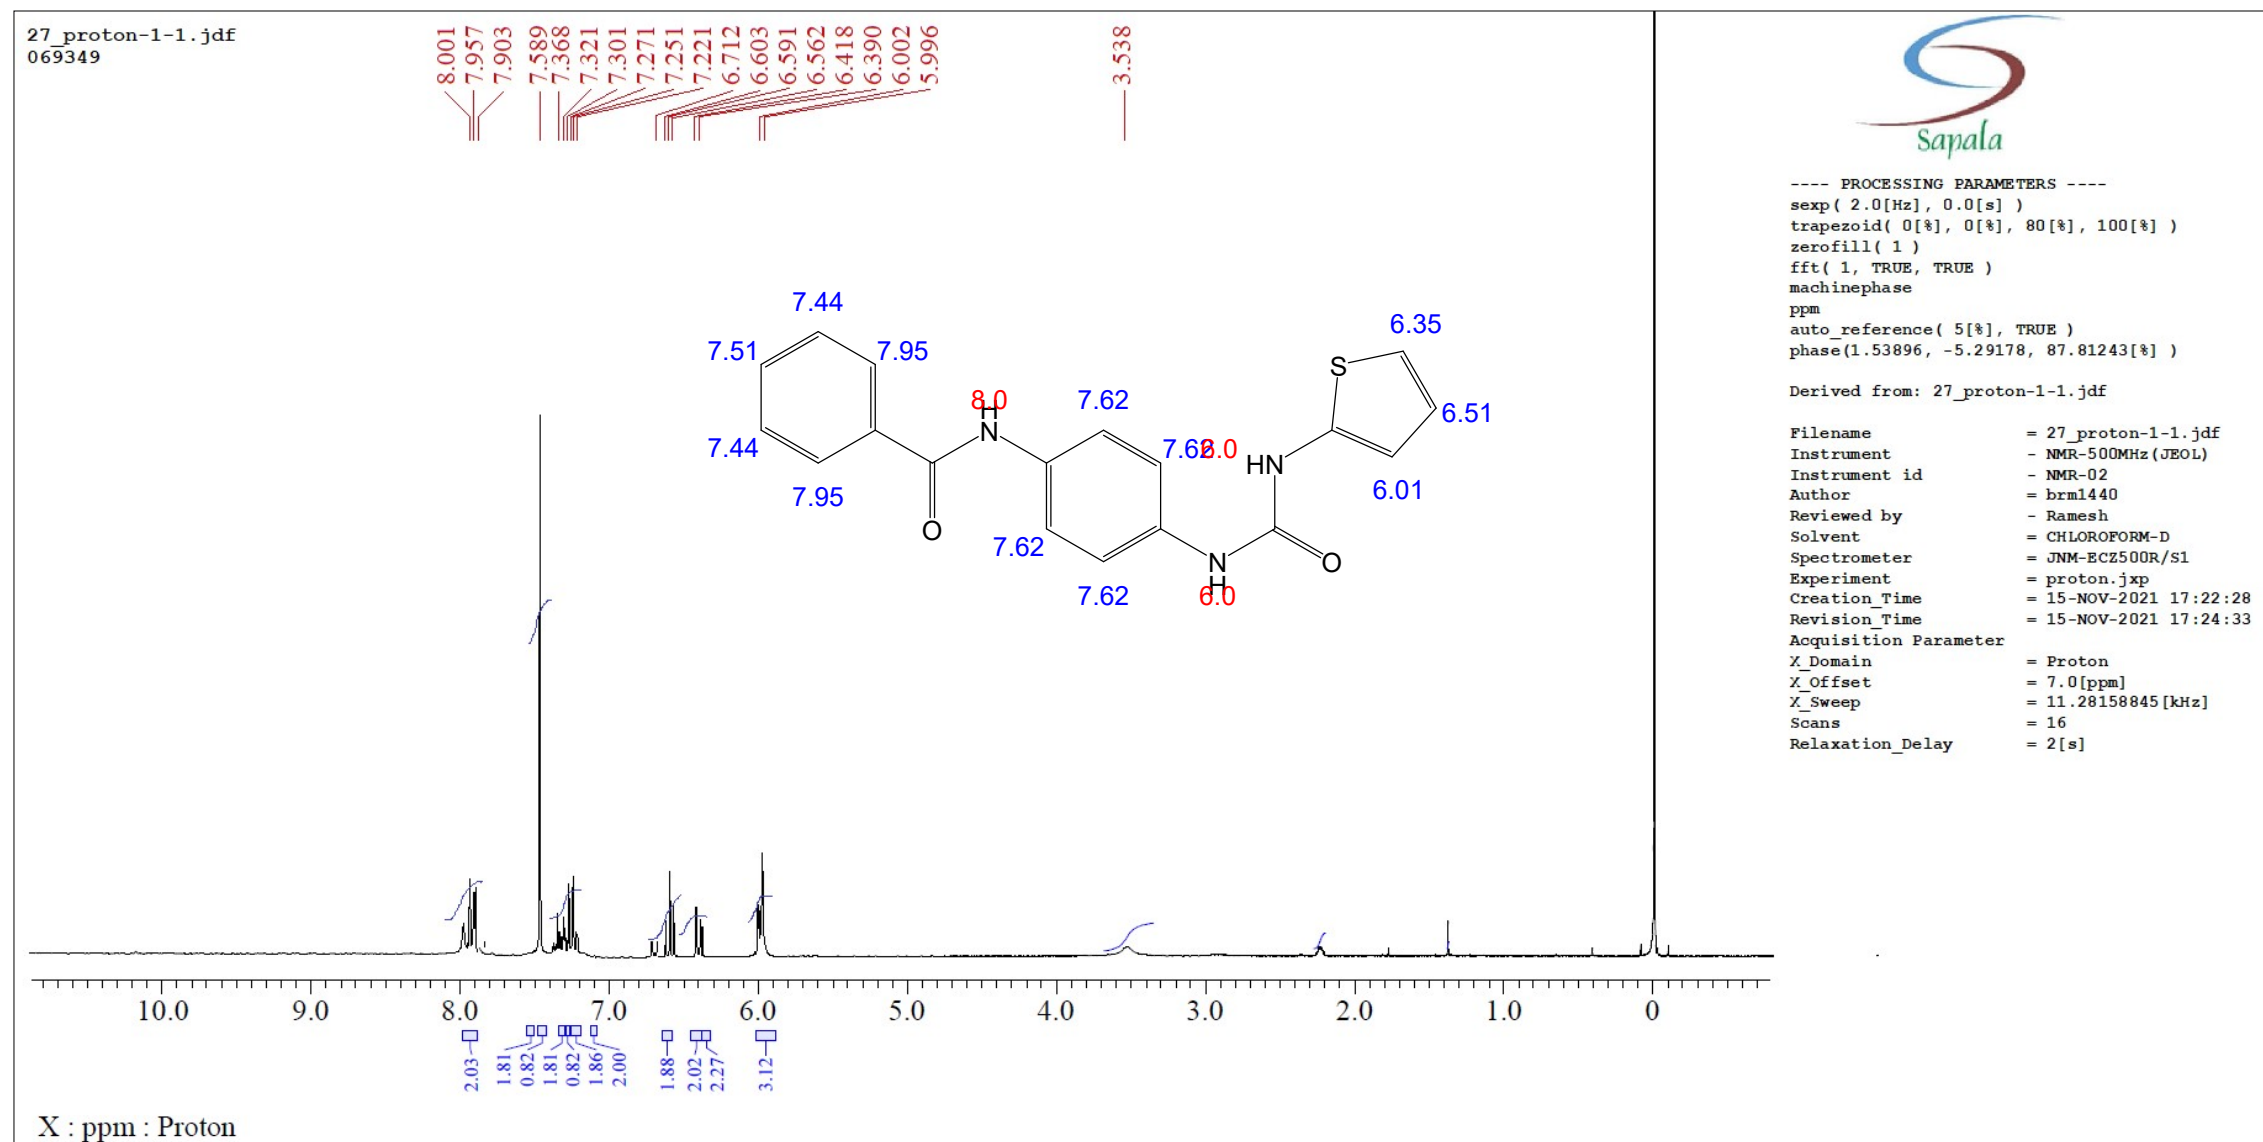

Figure S8. <sup>1</sup>H NMR spectrum of compound 6c

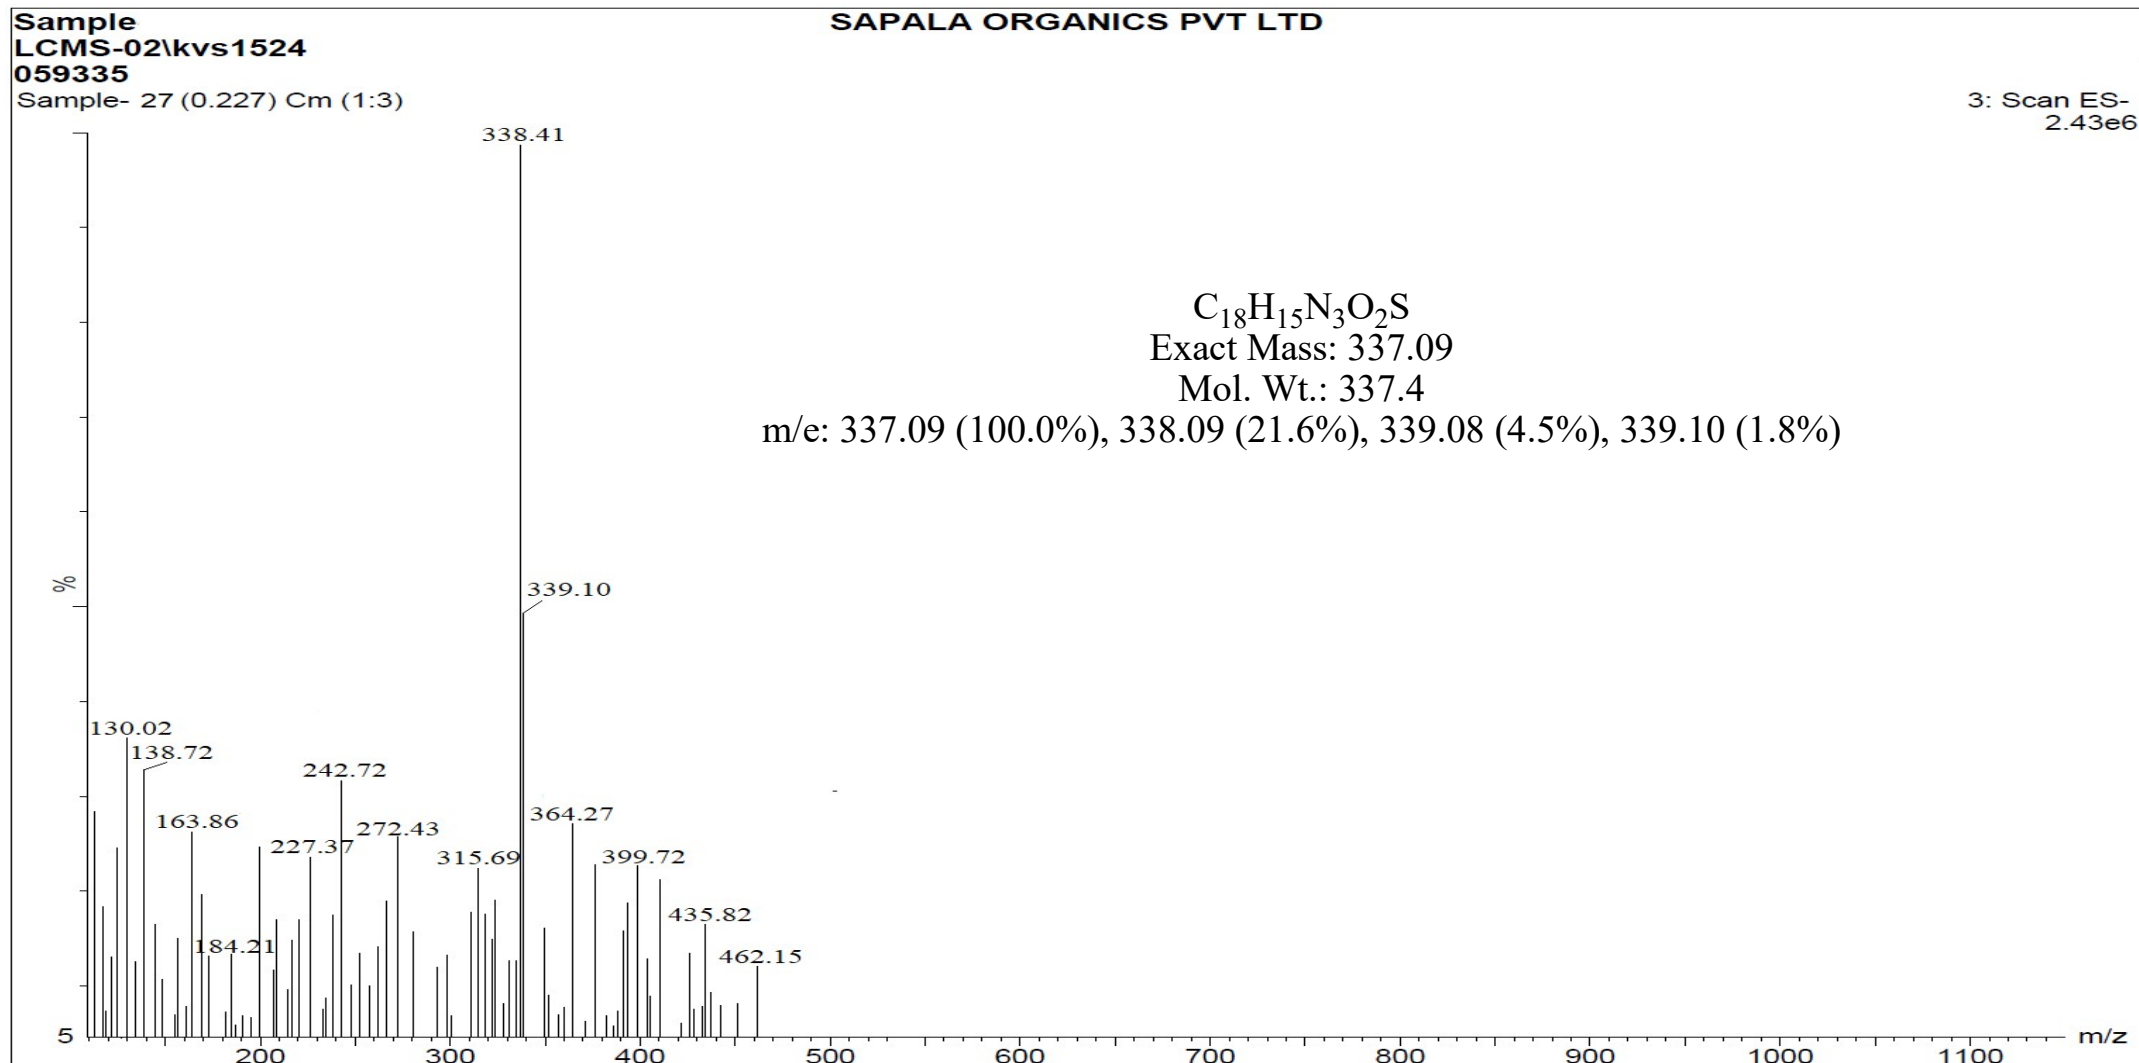

Figure S9. Mass spectrum of compound 6c

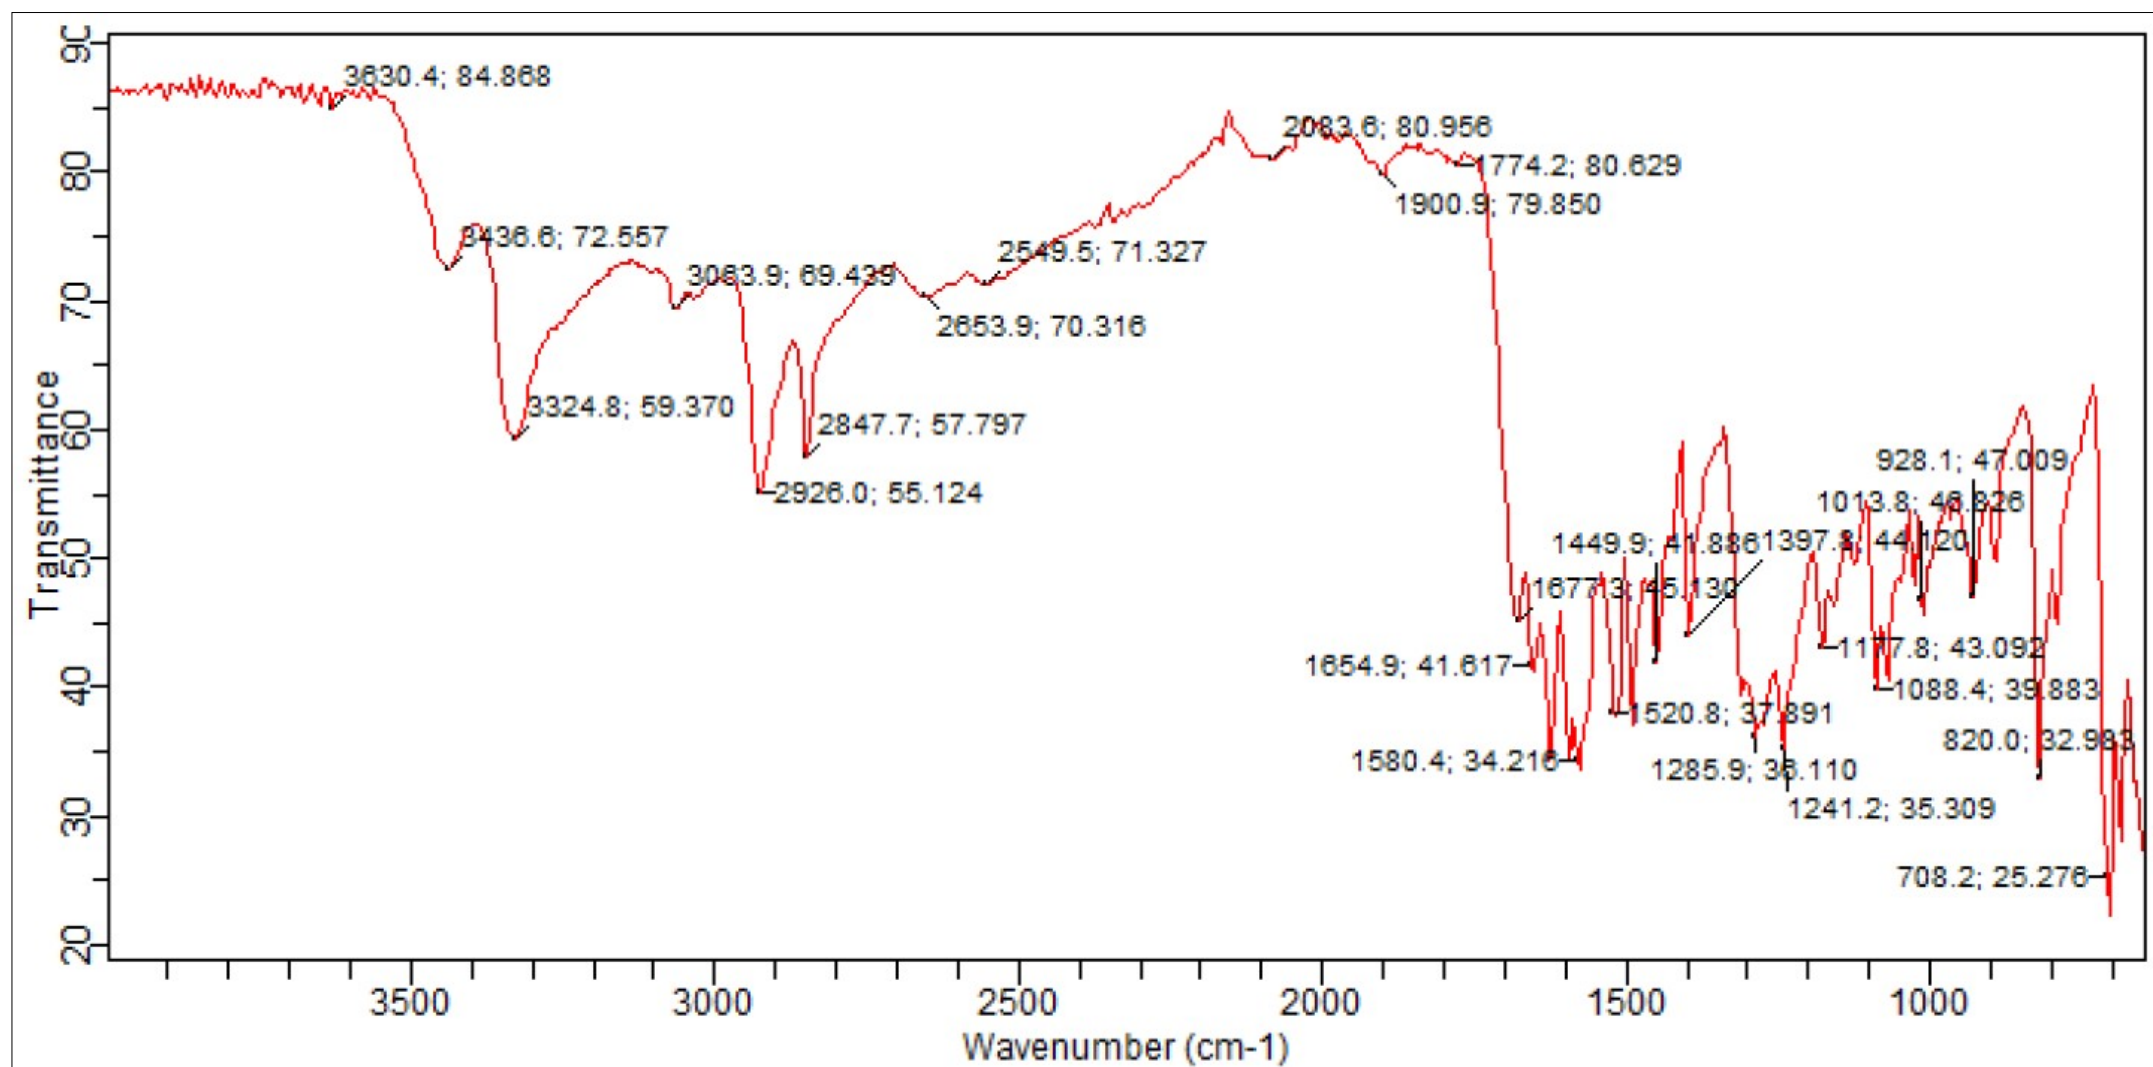

Figure S10. FTIR spectrum of compound 6d



**Interpretation:**

| Structure                                                                                                                                                                                                                                                                                                                                                                                                                                                                                                                                                   | Functional Group       | Standard Values | Observed Values     |
|-------------------------------------------------------------------------------------------------------------------------------------------------------------------------------------------------------------------------------------------------------------------------------------------------------------------------------------------------------------------------------------------------------------------------------------------------------------------------------------------------------------------------------------------------------------|------------------------|-----------------|---------------------|
| 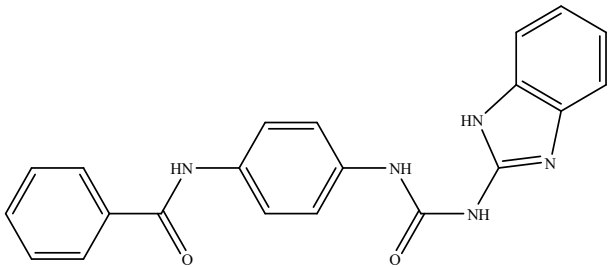 <p>The chemical structure shows a benzamide group (a benzene ring attached to a carbonyl group, which is further attached to an NH group) connected via its nitrogen atom to the para position of a central benzene ring. This central benzene ring is also connected via its other para position to the nitrogen atom of another benzamide group. The nitrogen atom of this second benzamide group is further attached to the 2-position of an indazole ring system.</p> | N-H stretching         | 3350-3310       | 3324.8              |
|                                                                                                                                                                                                                                                                                                                                                                                                                                                                                                                                                             | C-N stretching (Ar)    | 1342-1266       | 1285.9              |
|                                                                                                                                                                                                                                                                                                                                                                                                                                                                                                                                                             | N-H bending            | 1650-1580       | 1580.4              |
|                                                                                                                                                                                                                                                                                                                                                                                                                                                                                                                                                             | C=N stretching         | 1690-1640       | 1677.3              |
|                                                                                                                                                                                                                                                                                                                                                                                                                                                                                                                                                             | C=O stretching (amide) | 1690            | 1625.1              |
|                                                                                                                                                                                                                                                                                                                                                                                                                                                                                                                                                             | aromatic C-H bending   | 900-700         | 820.0, 708.2, 894.6 |

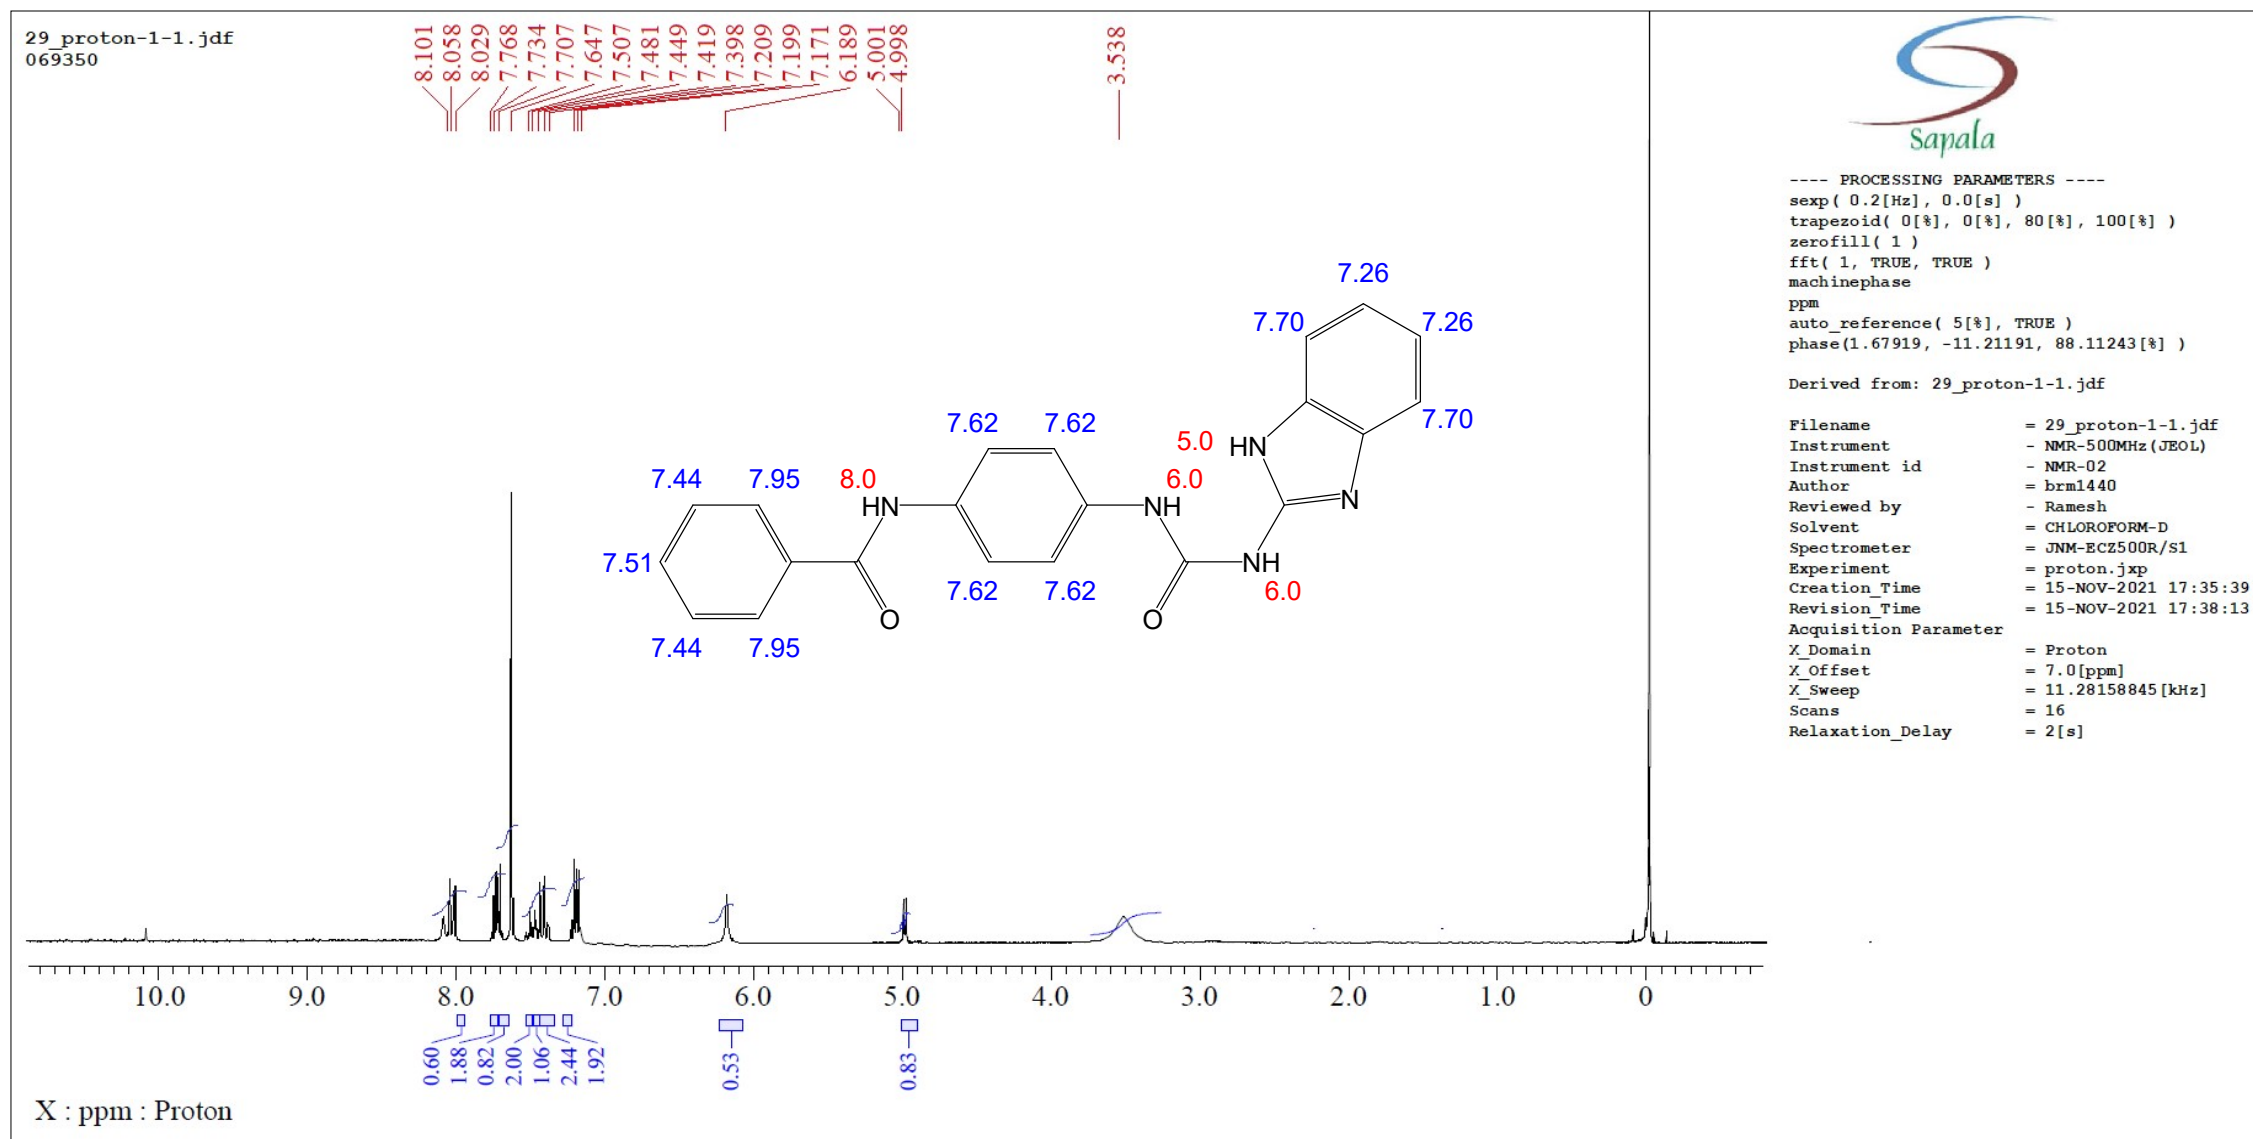

Figure S11. <sup>1</sup>HNMR spectrum of compound 6d

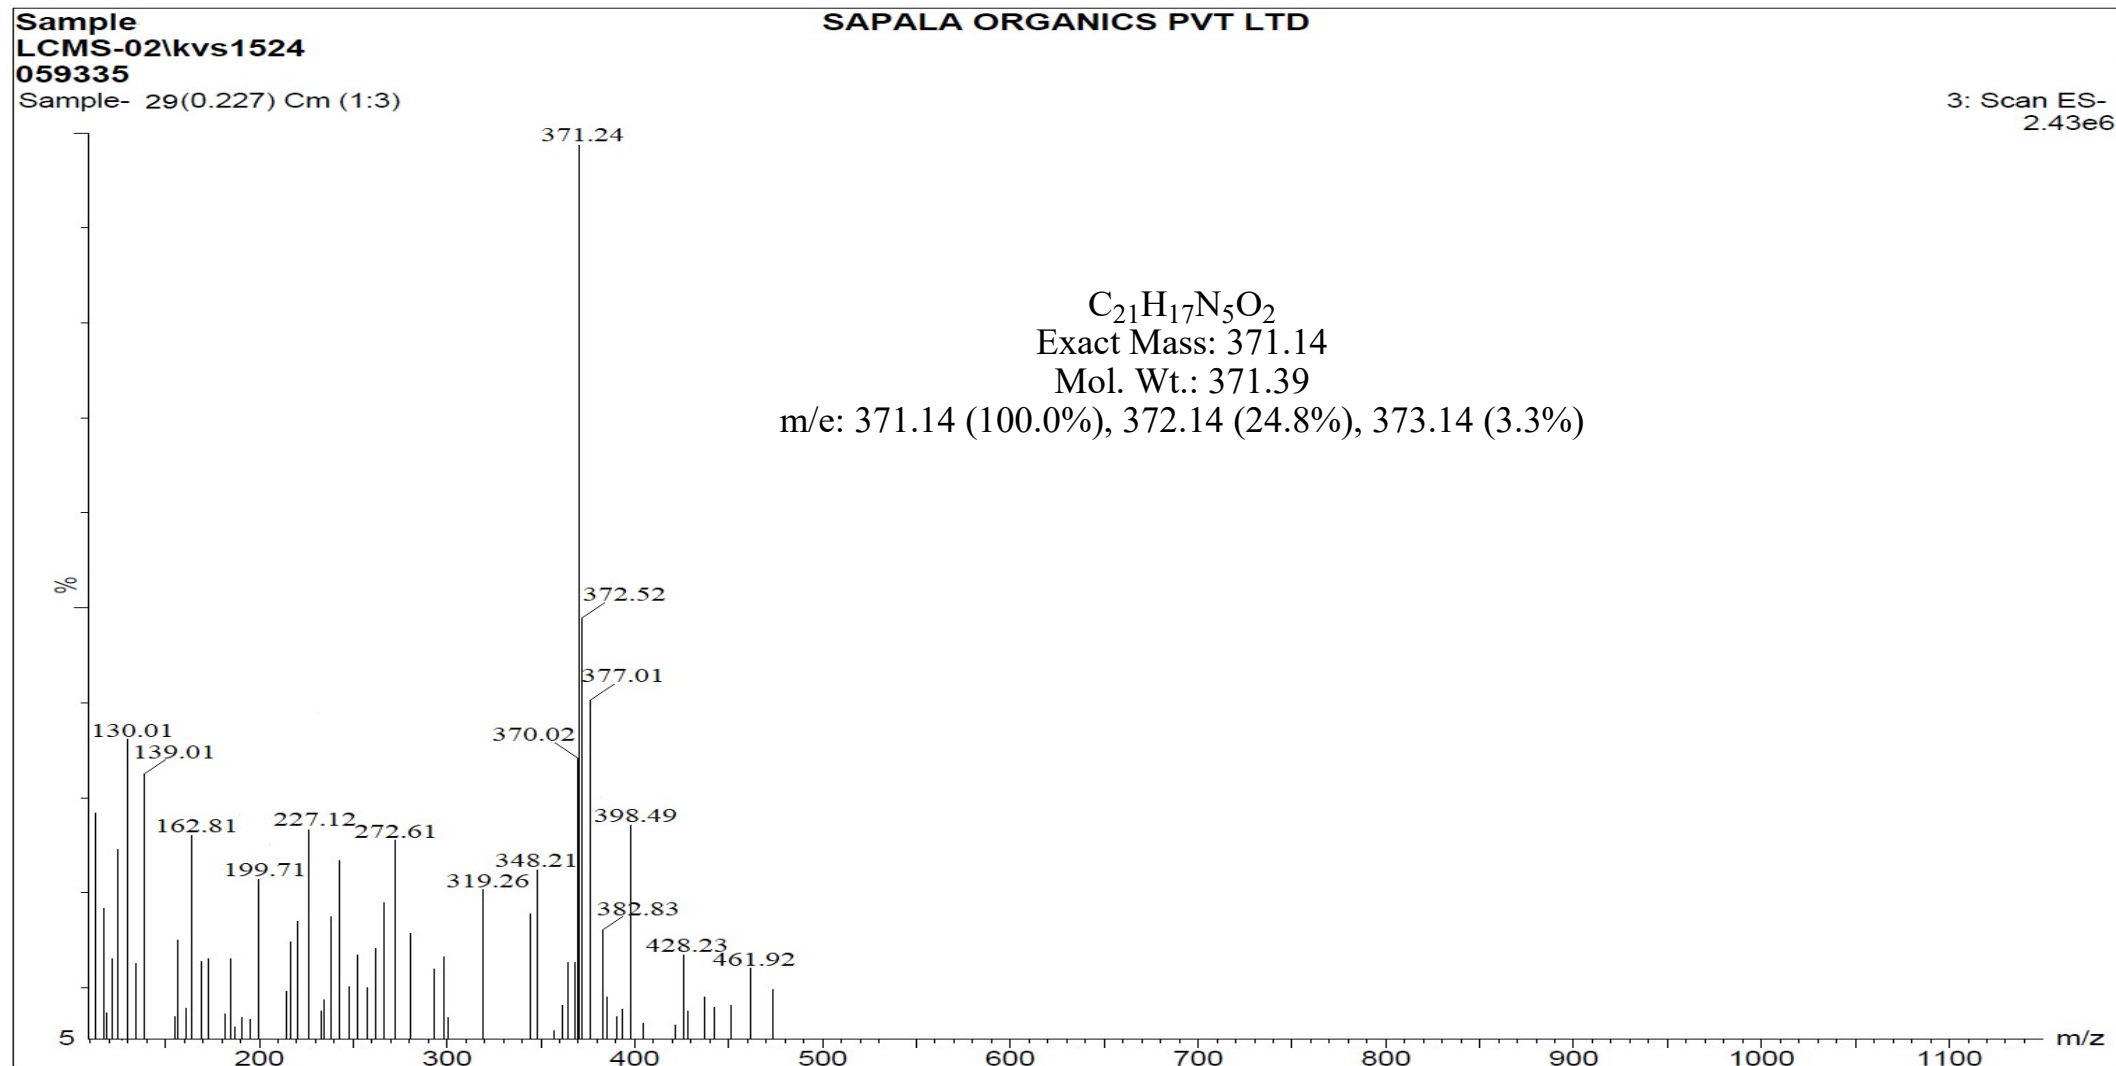

Figure S12. Mass spectrum of compound 6d

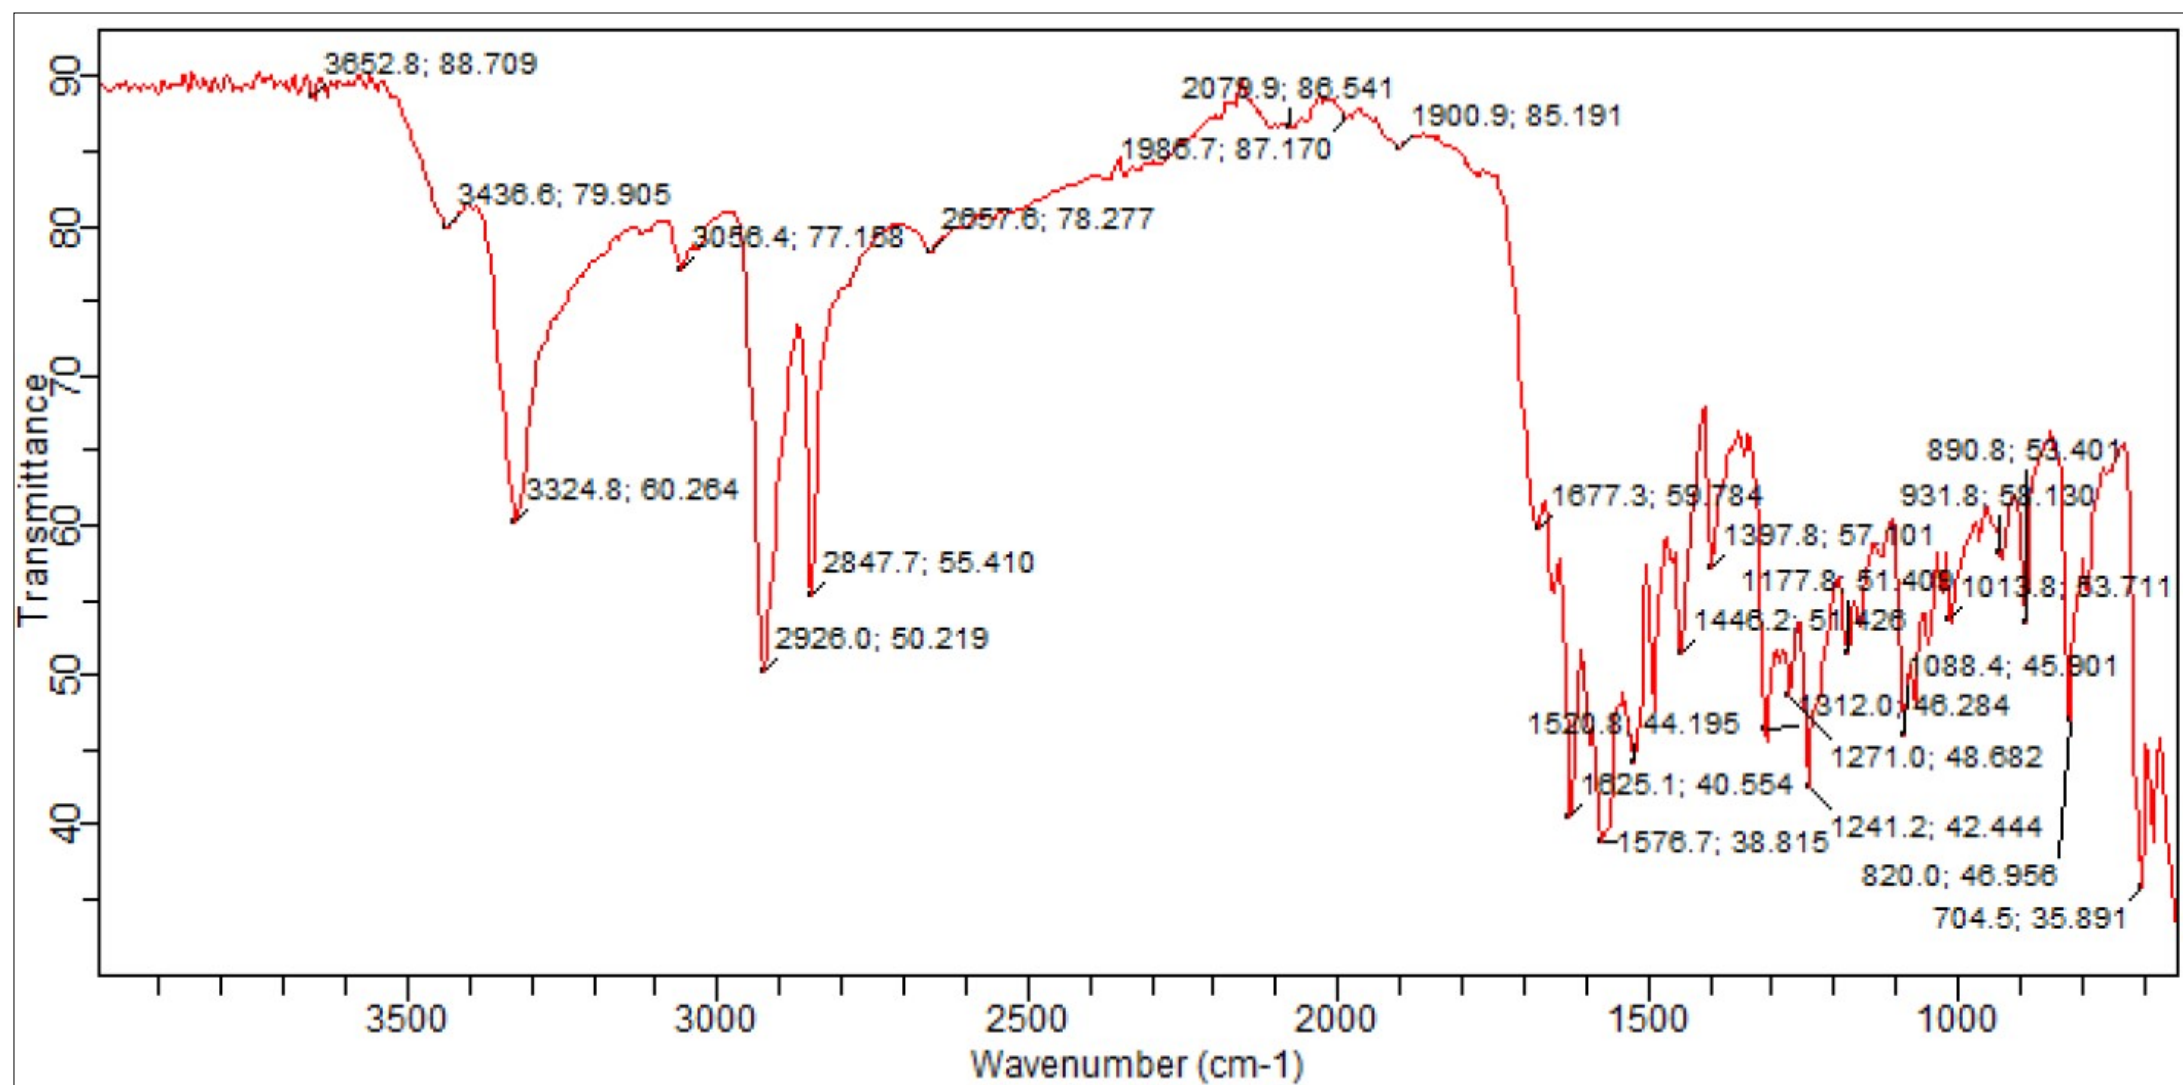

Figure S13. FTIR spectrum of compound 6c

**Interpretation:**

| Structure                                                                                                                                                                                                                                                                                                                                                                                                                               | Functional Group       | Standard Values | Observed Values     |
|-----------------------------------------------------------------------------------------------------------------------------------------------------------------------------------------------------------------------------------------------------------------------------------------------------------------------------------------------------------------------------------------------------------------------------------------|------------------------|-----------------|---------------------|
| 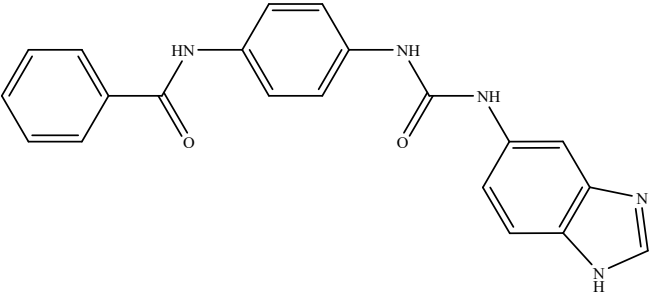 <p>The chemical structure shows a benzamide group (a benzene ring attached to a carbonyl group, which is further attached to an NH group) connected via its nitrogen atom to the carbonyl carbon of another benzamide group. This second benzamide group is further connected via its nitrogen atom to the 2-position of an indazole ring system.</p> | N-H stretching         | 3350-3310       | 3324.8              |
|                                                                                                                                                                                                                                                                                                                                                                                                                                         | C-N stretching (Ar)    | 1342-1266       | 1312.0              |
|                                                                                                                                                                                                                                                                                                                                                                                                                                         | N-H bending            | 1650-1580       | 1576.7              |
|                                                                                                                                                                                                                                                                                                                                                                                                                                         | C=N stretching         | 1690-1640       | 1677.3              |
|                                                                                                                                                                                                                                                                                                                                                                                                                                         | C=O stretching (amide) | 1690            | 1625.1              |
|                                                                                                                                                                                                                                                                                                                                                                                                                                         | aromatic C-H bending   | 900-700         | 820.0, 704.5, 894.6 |

**<sup>1</sup>H NMR:**

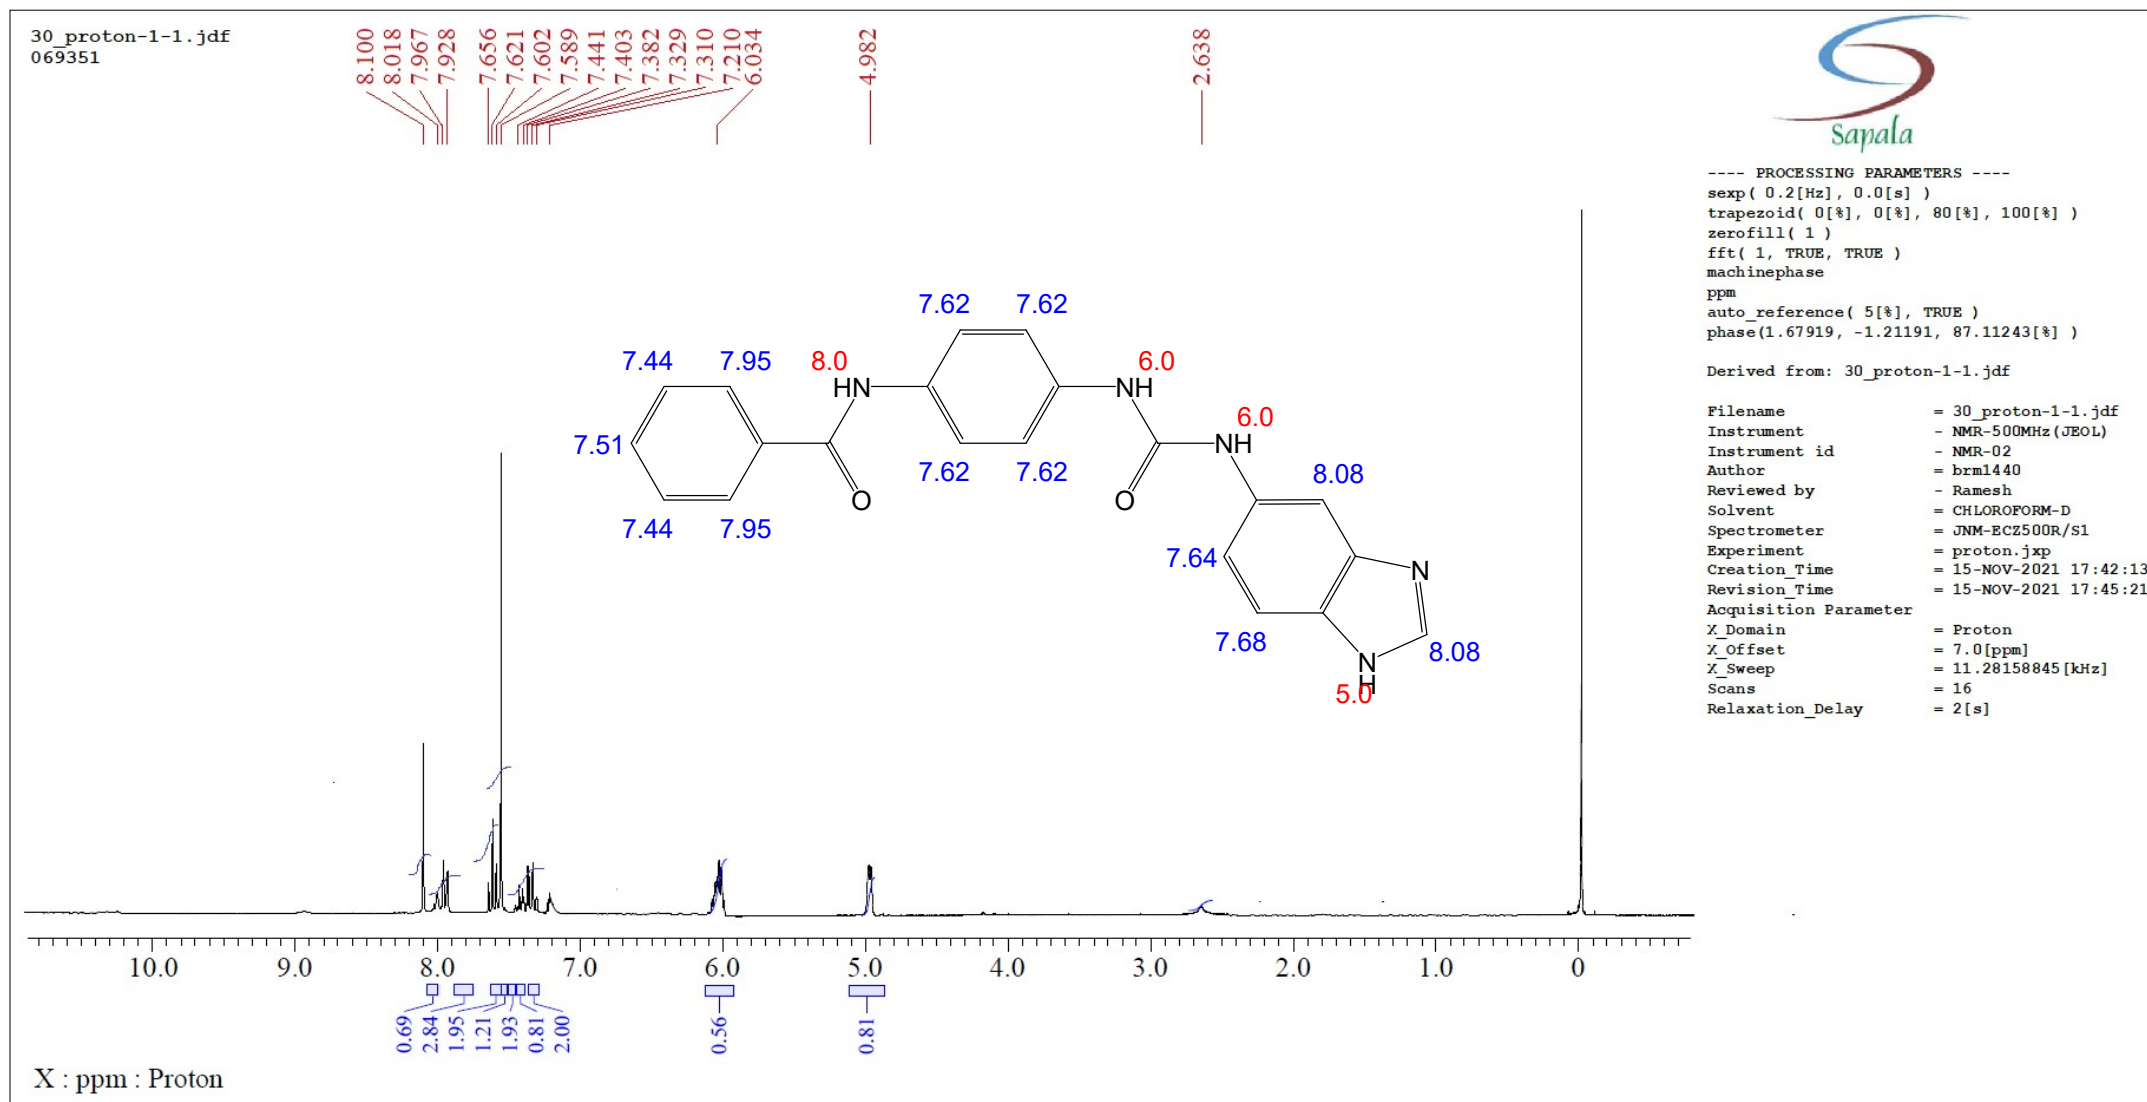

Figure S14. <sup>1</sup>H NMR spectrum of compound 6c

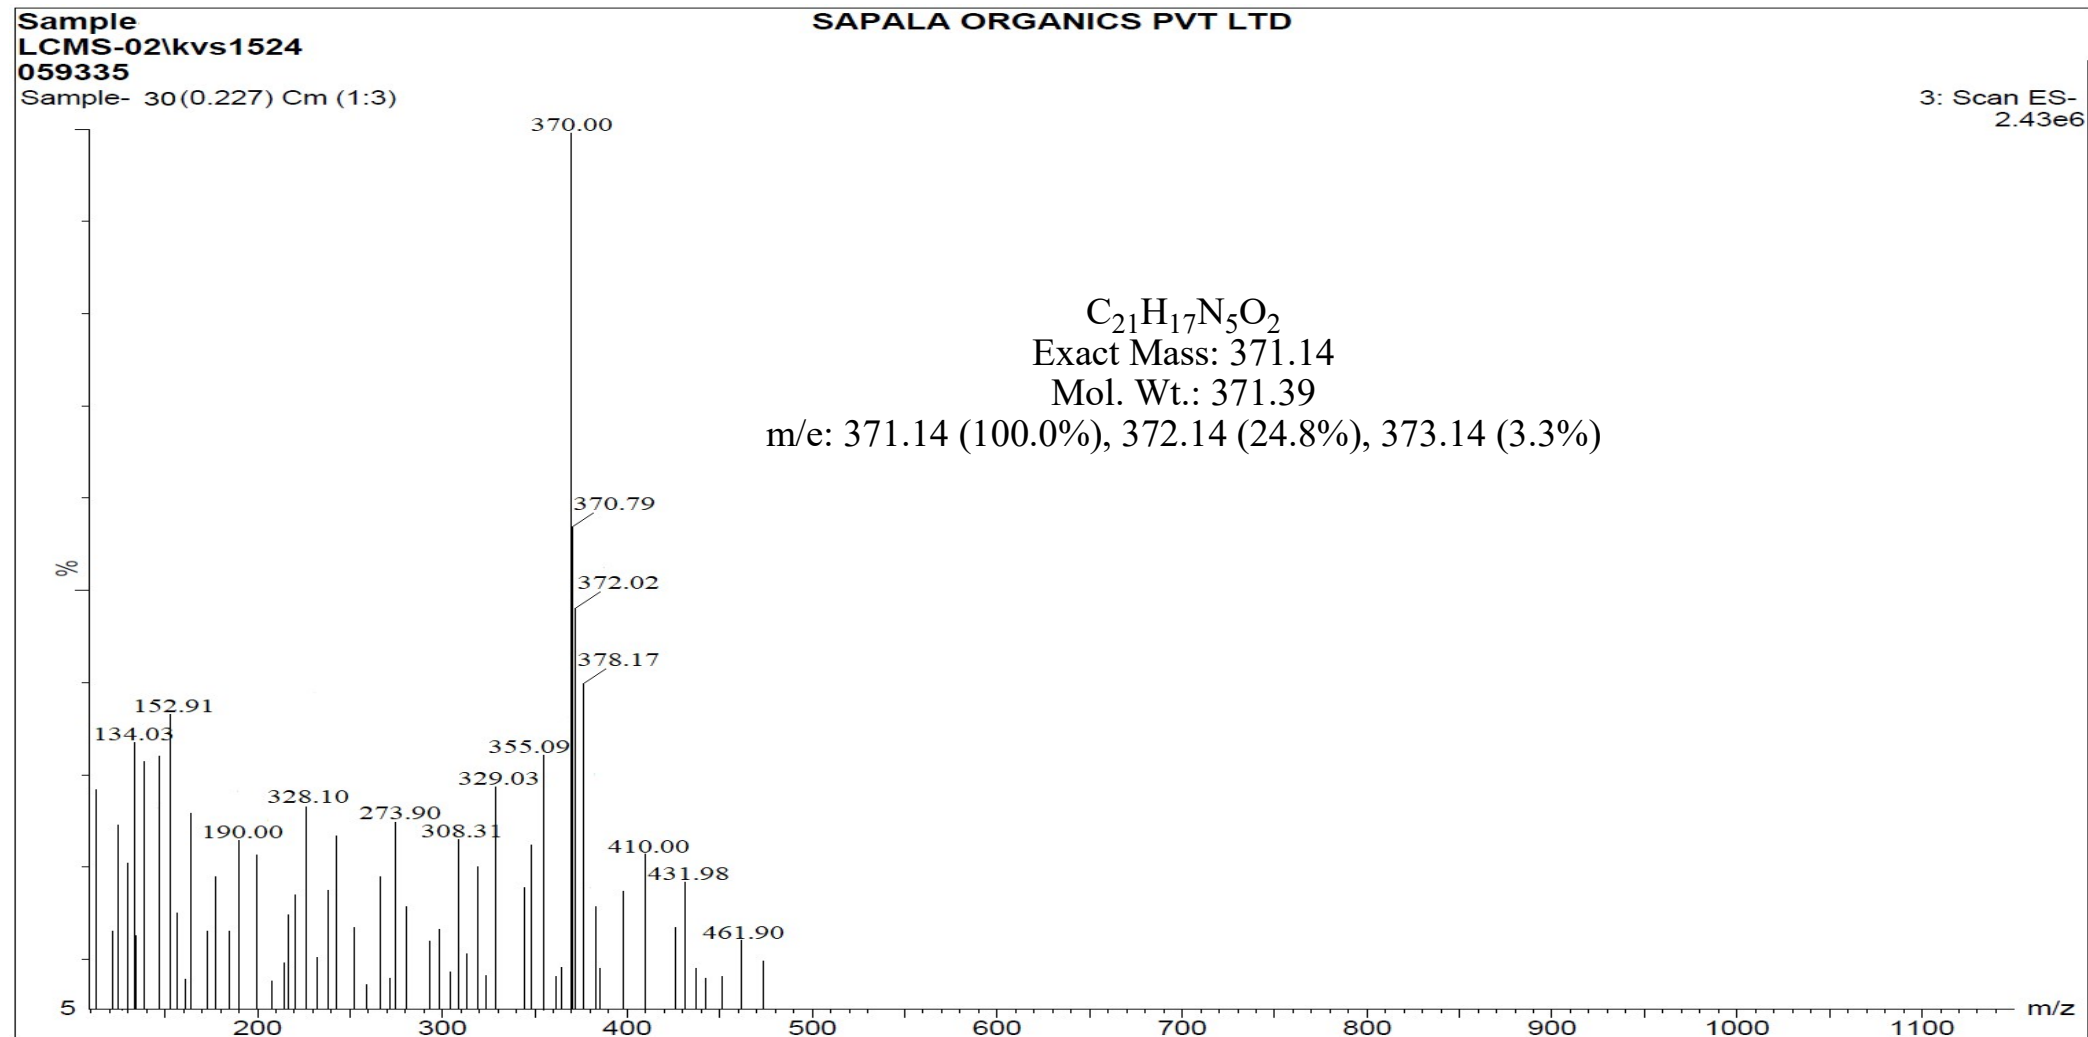

Figure S15. Mass spectrum of compound 6e

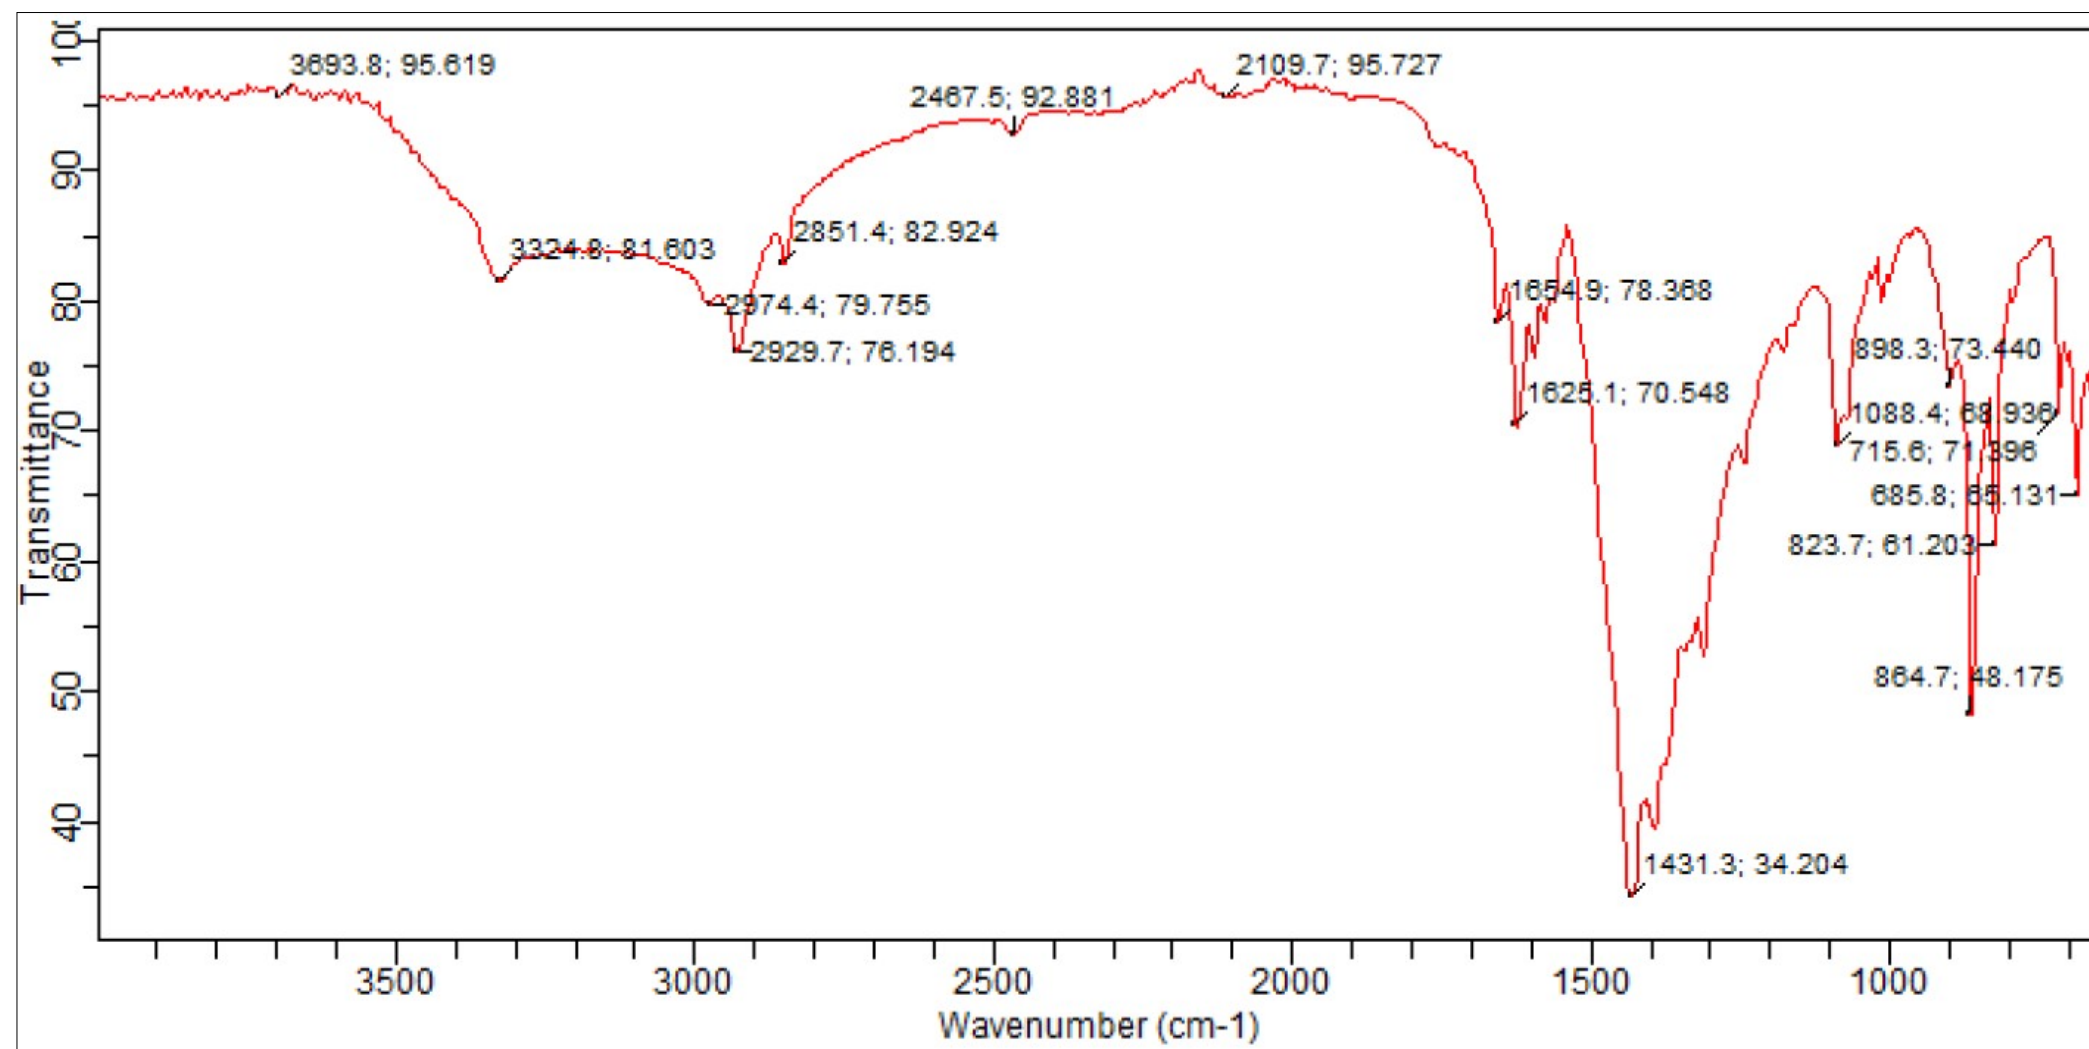

Figure S16. FTIR spectrum of compound 6f



**Interpretation:**

| Structure                                                                         | Functional Group       | Standard Values | Observed Values     |
|-----------------------------------------------------------------------------------|------------------------|-----------------|---------------------|
| 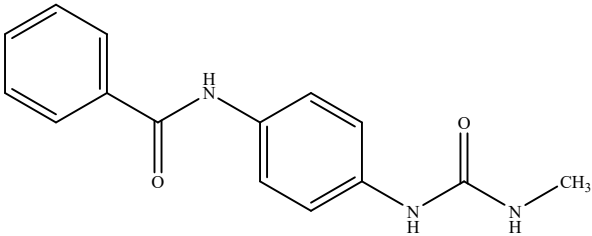 | N-H stretching         | 3350-3310       | 3324.8              |
|                                                                                   | C-N stretching (Ar)    | 1342-1266       | 1312.0              |
|                                                                                   | N-H bending            | 1650-1580       | 1576.7              |
|                                                                                   | C=O stretching         | 1690-1640       | 1672.9              |
|                                                                                   | C=O stretching (amide) | 1690            | 1625.1              |
|                                                                                   | aromatic C-H bending   | 900-700         | 823.7, 715.6, 894.6 |

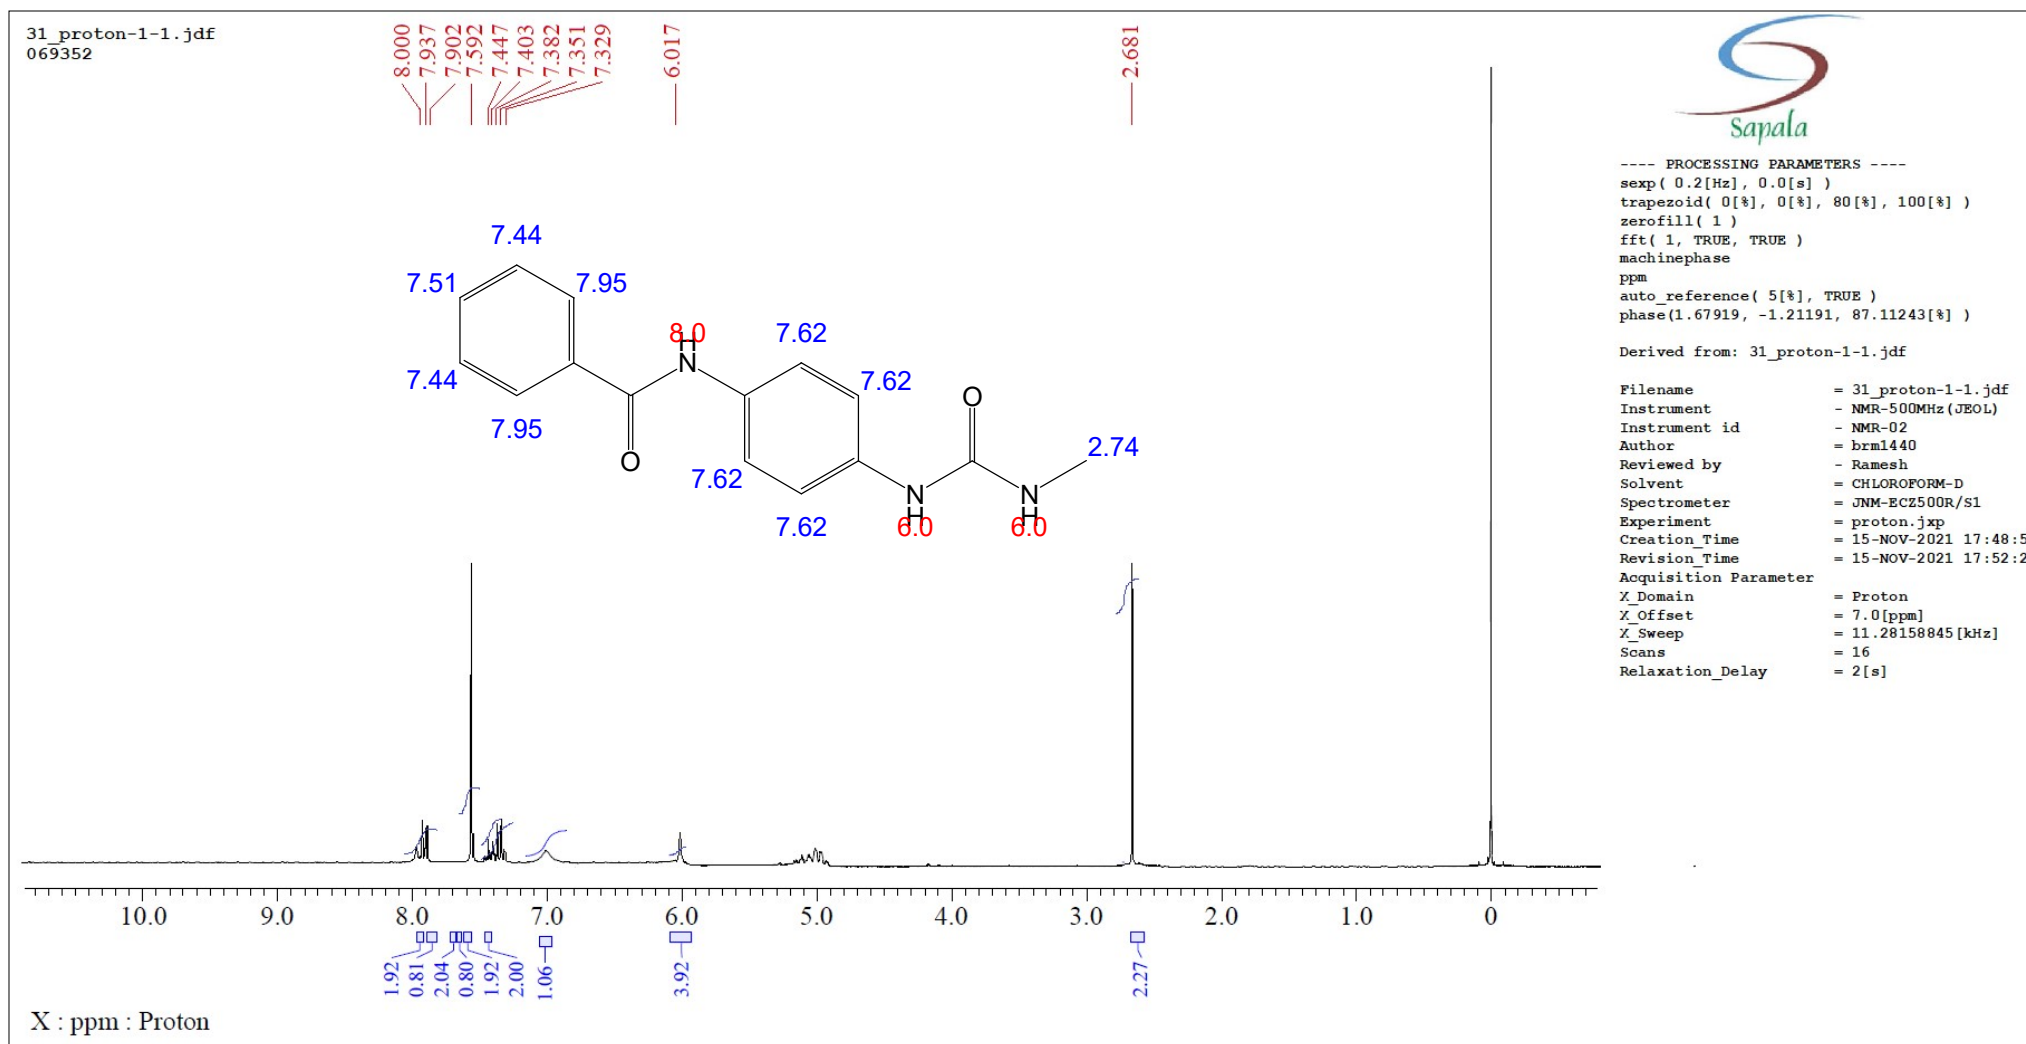

Figure S17. <sup>1</sup>HNMR spectrum of compound 6f

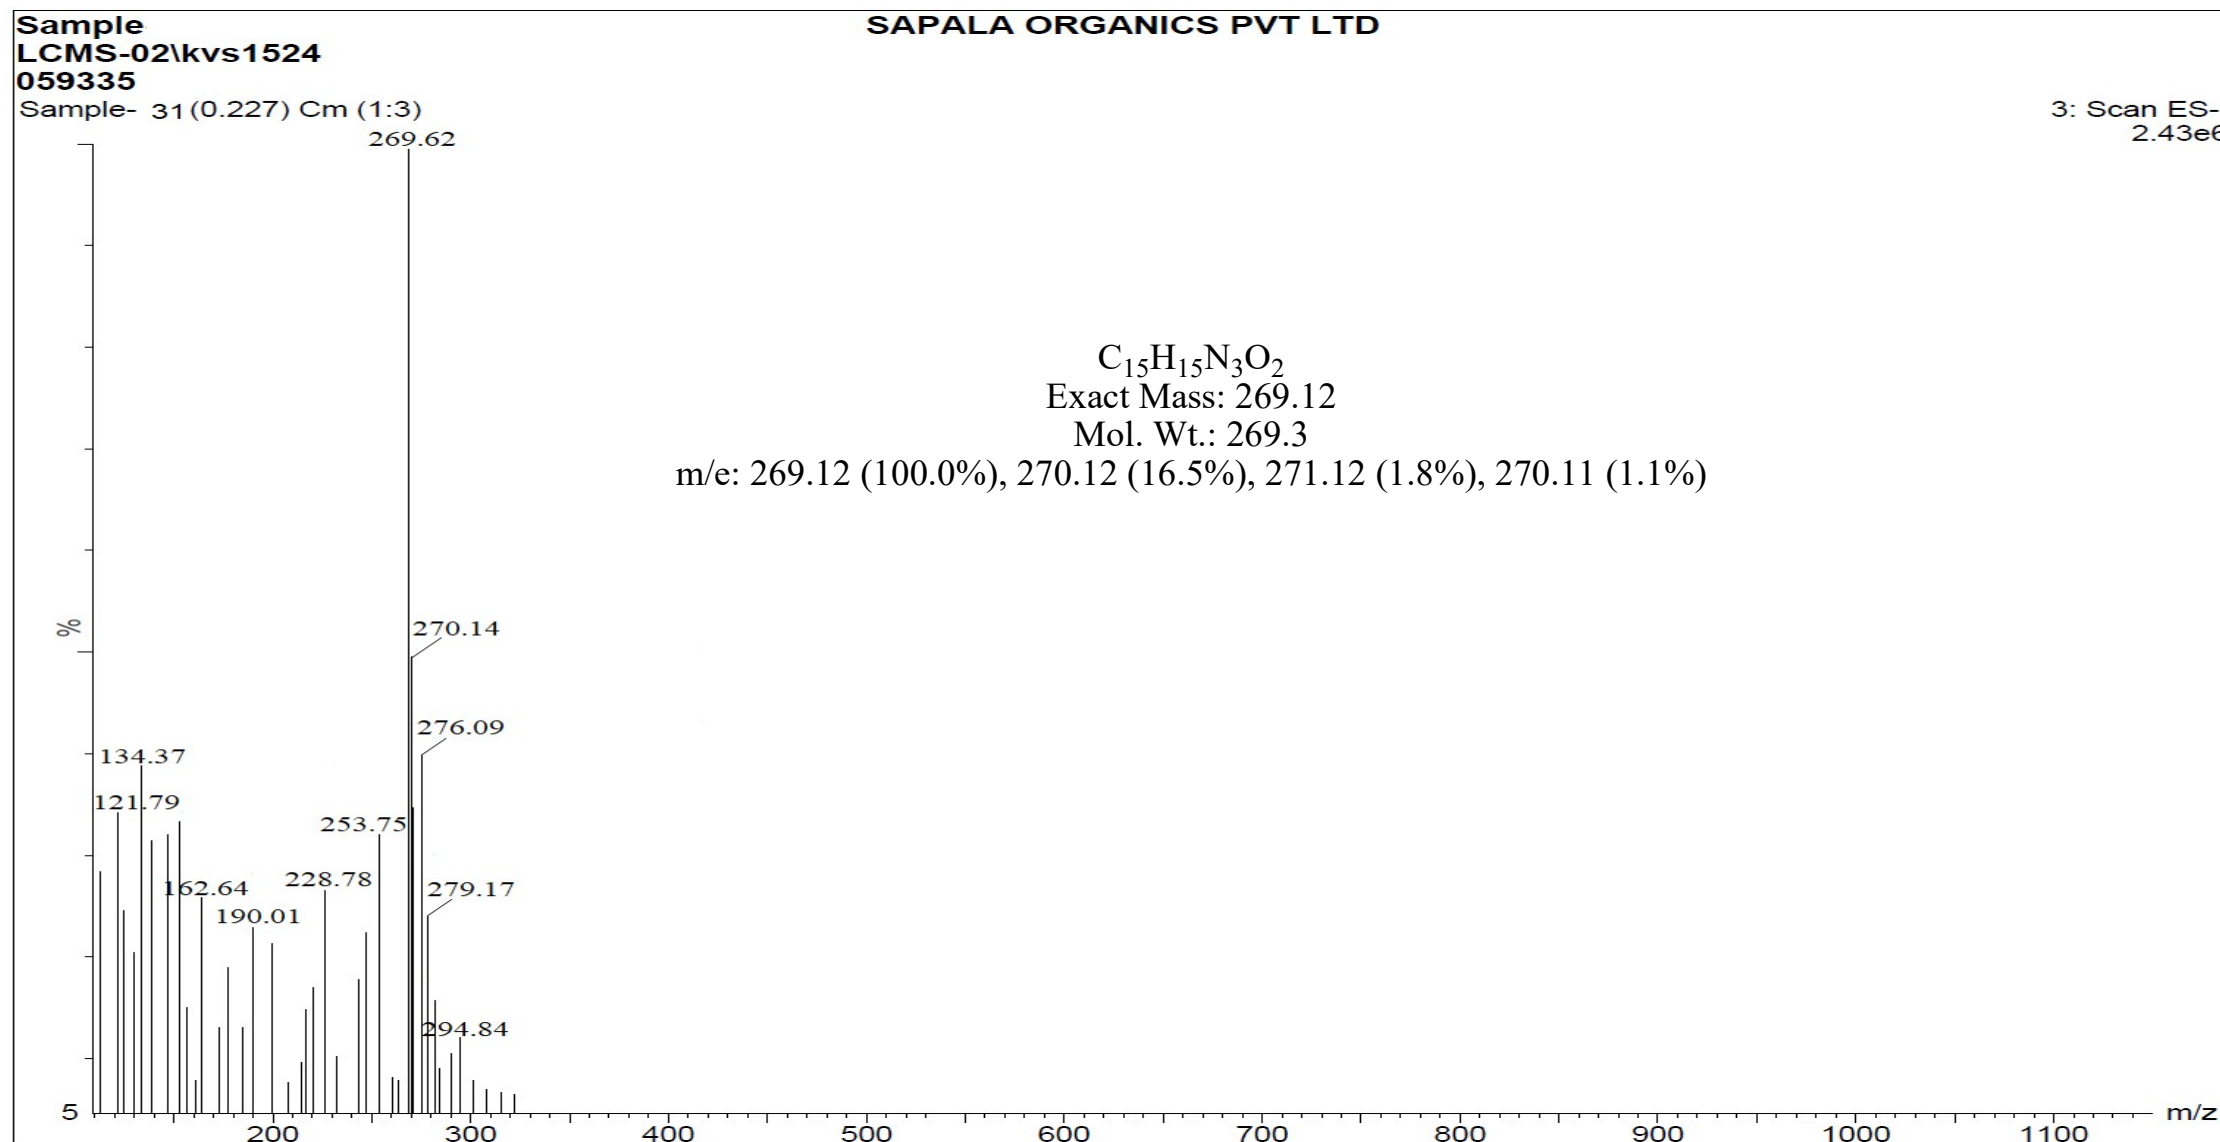

Figure S18. Mass spectrum of compound 6f

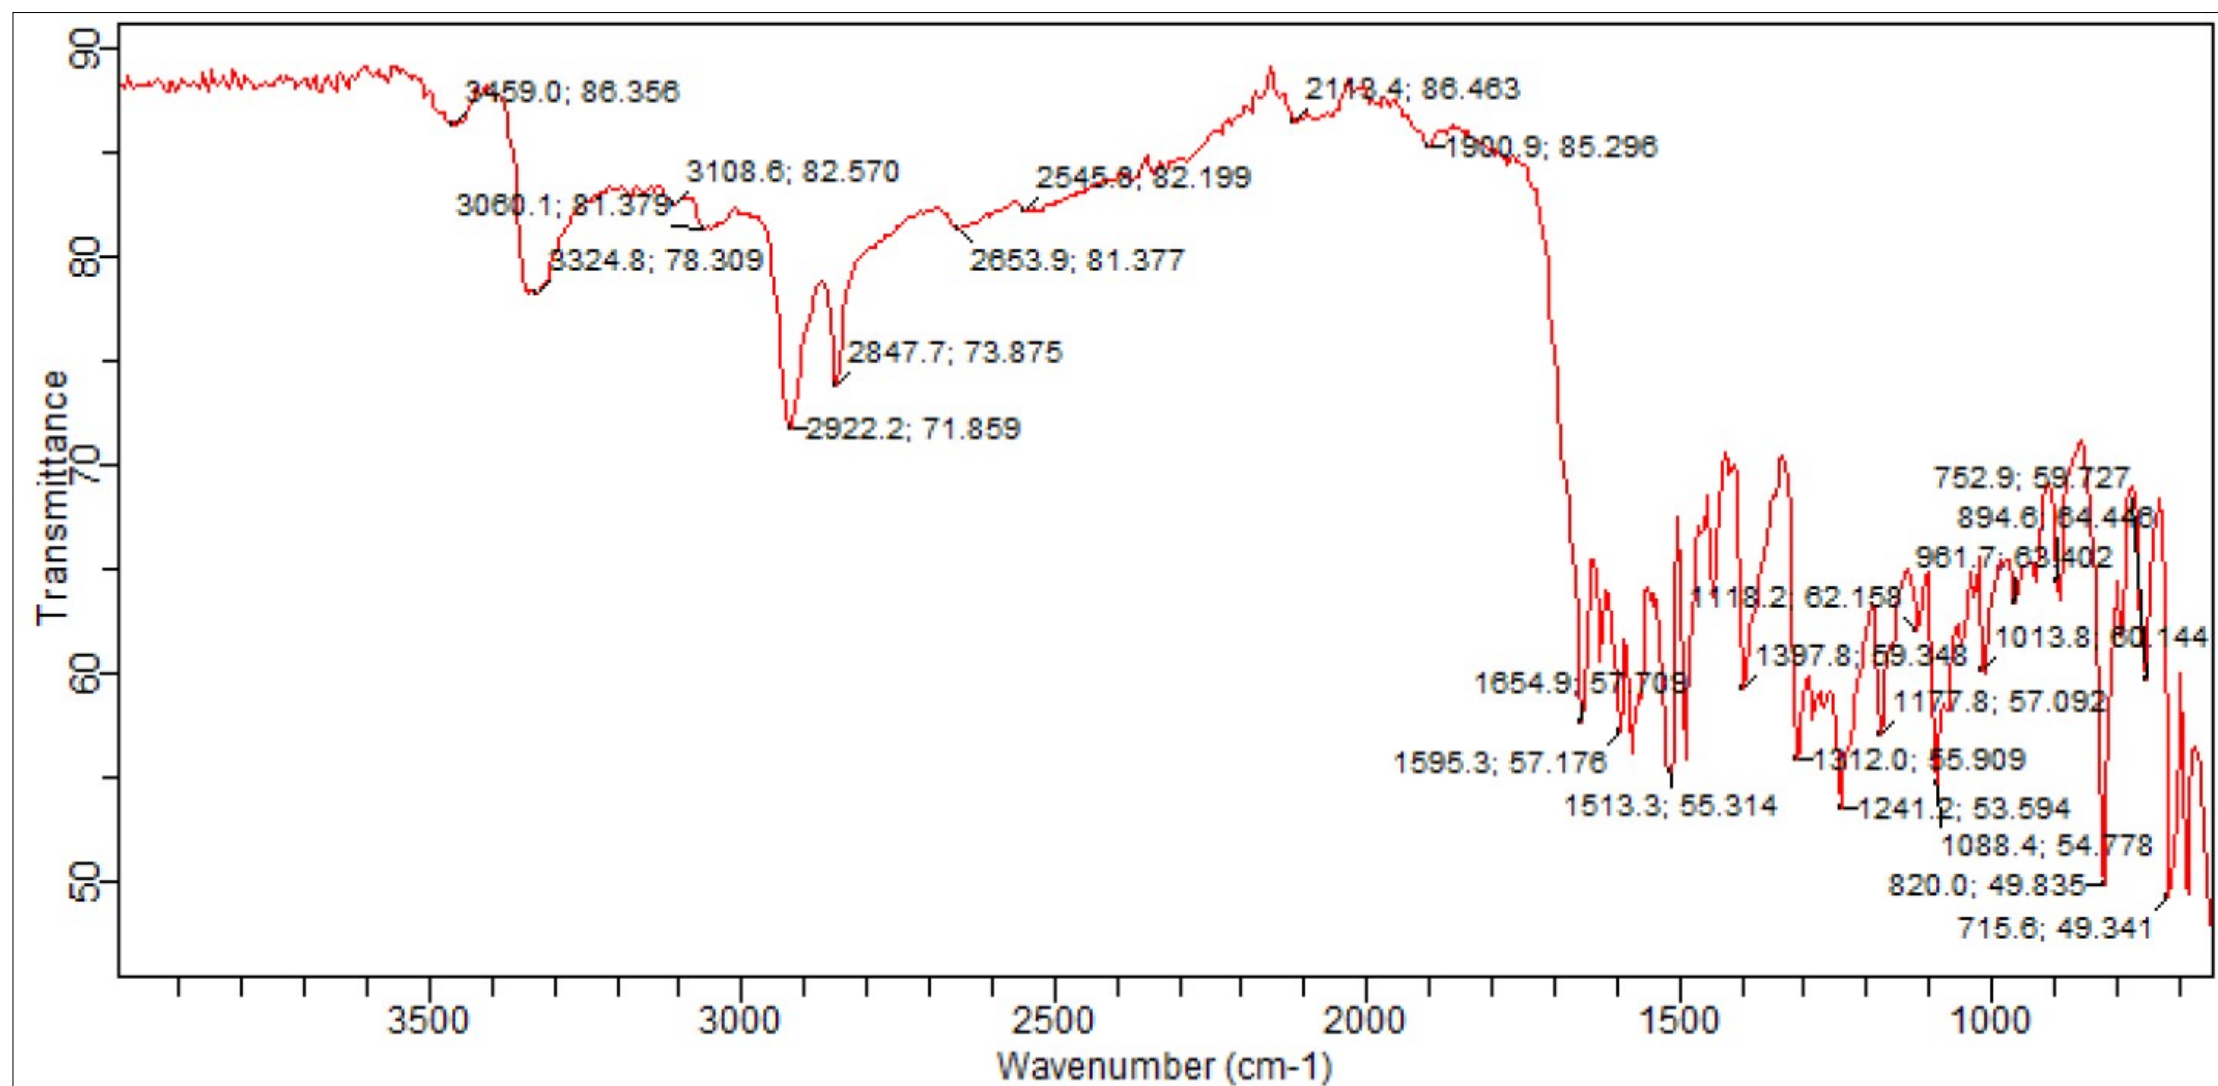

Figure S19. FTIR spectrum of compound 6g

**Interpretation:**

| Structure                                                                         | Functional Group       | Standard Values | Observed Values     |
|-----------------------------------------------------------------------------------|------------------------|-----------------|---------------------|
| 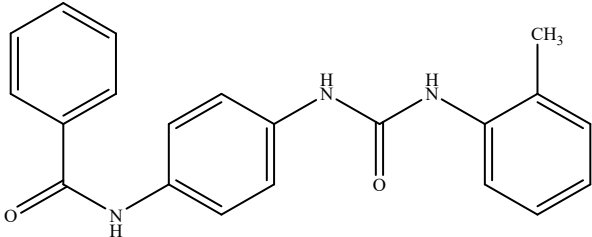 | N-H stretching         | 3350-3310       | 3324.8              |
|                                                                                   | C-N stretching (Ar)    | 1342-1266       | 1312.0              |
|                                                                                   | N-H bending            | 1650-1580       | 1576.7              |
|                                                                                   | C=N stretching         | 1690-1640       | 1654.9              |
|                                                                                   | C=O stretching (amide) | 1690            | 1625.1              |
|                                                                                   | aromatic C-H bending   | 900-700         | 820.0, 715.6, 894.6 |

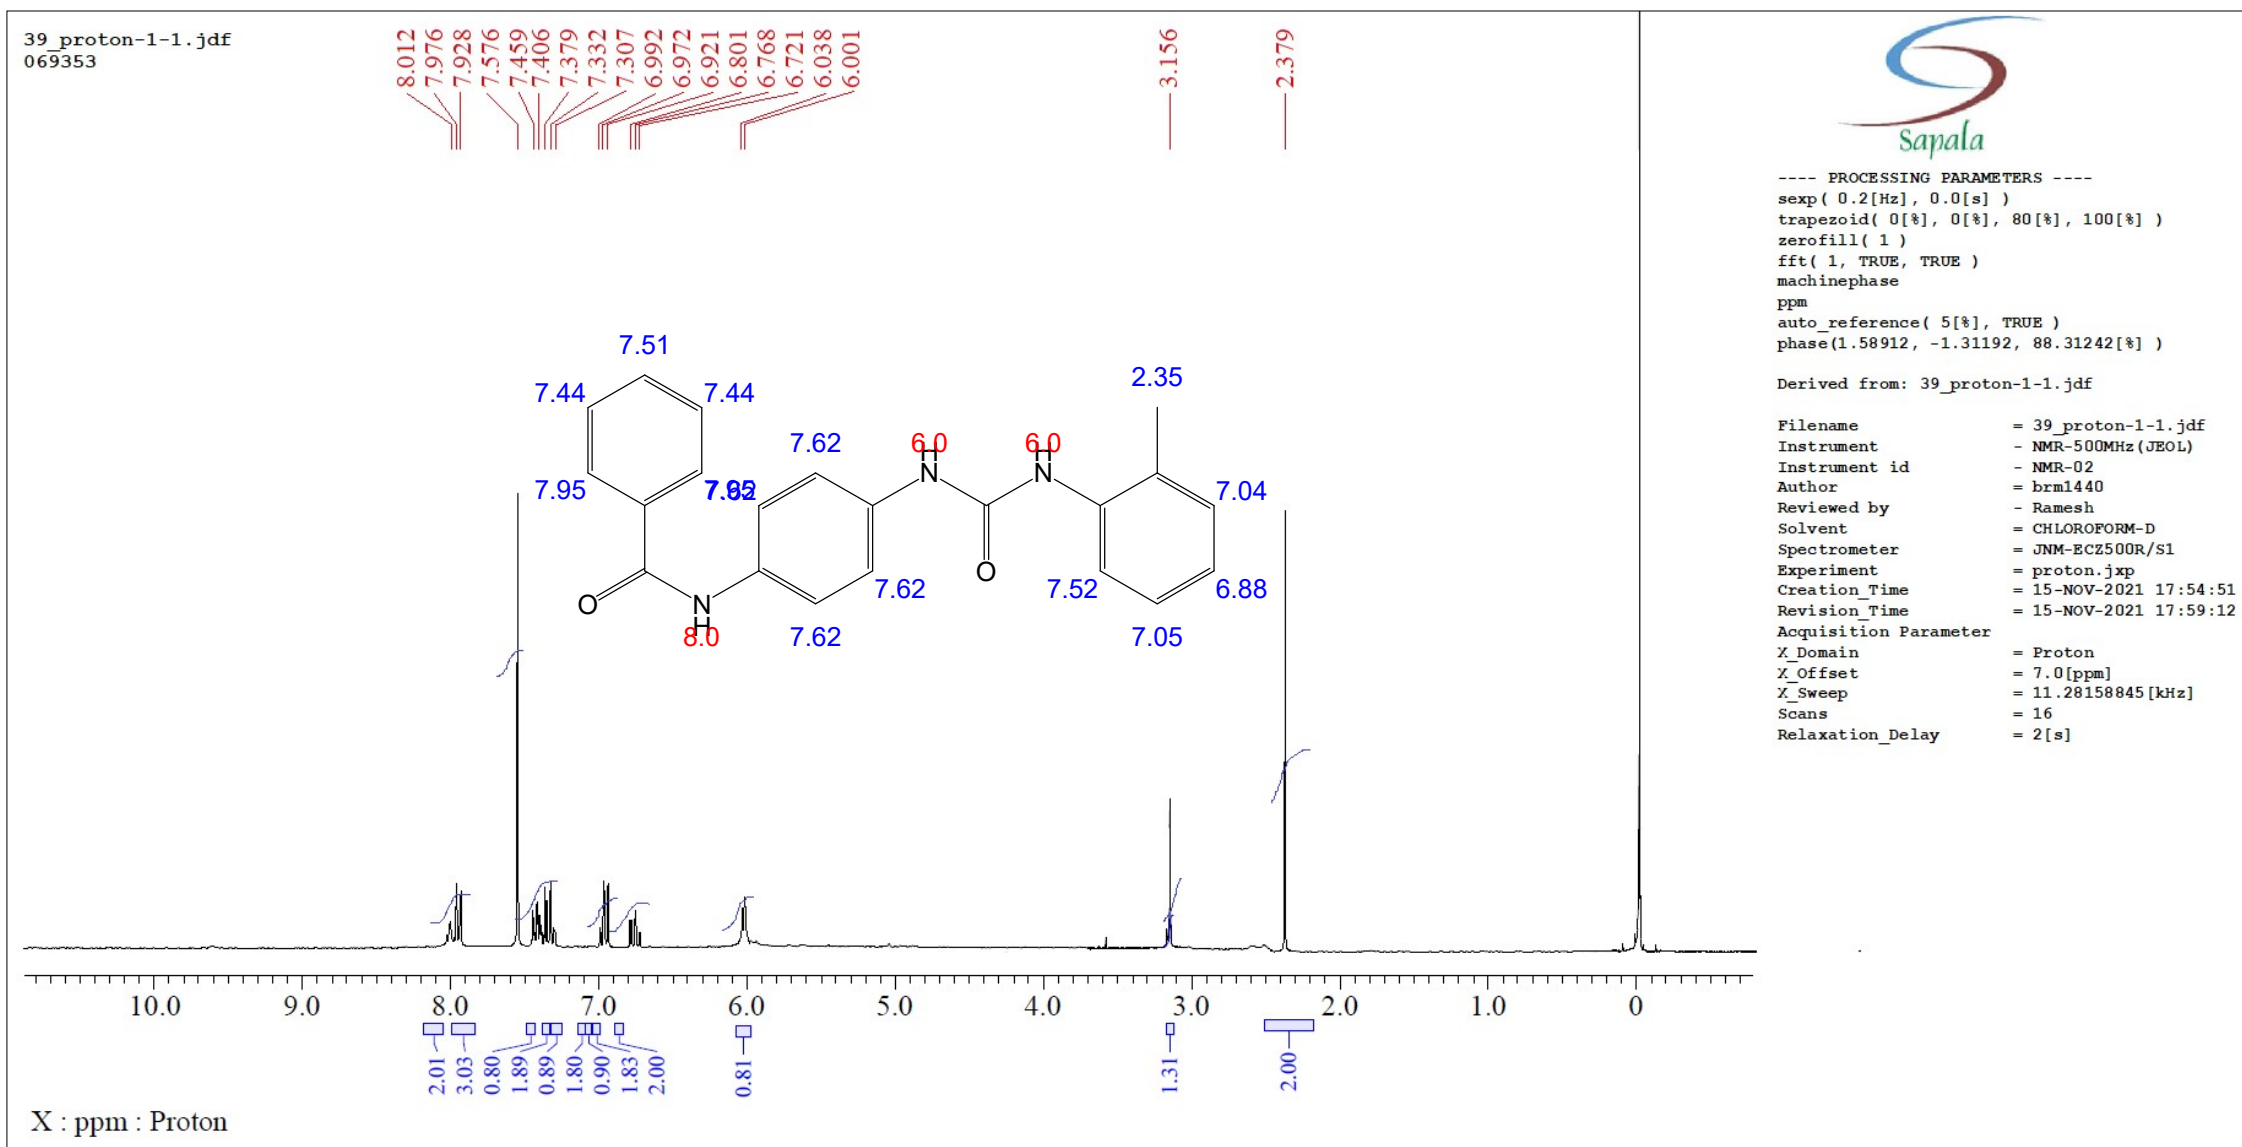

Figure S20. <sup>1</sup>HNMR spectrum of compound 6g

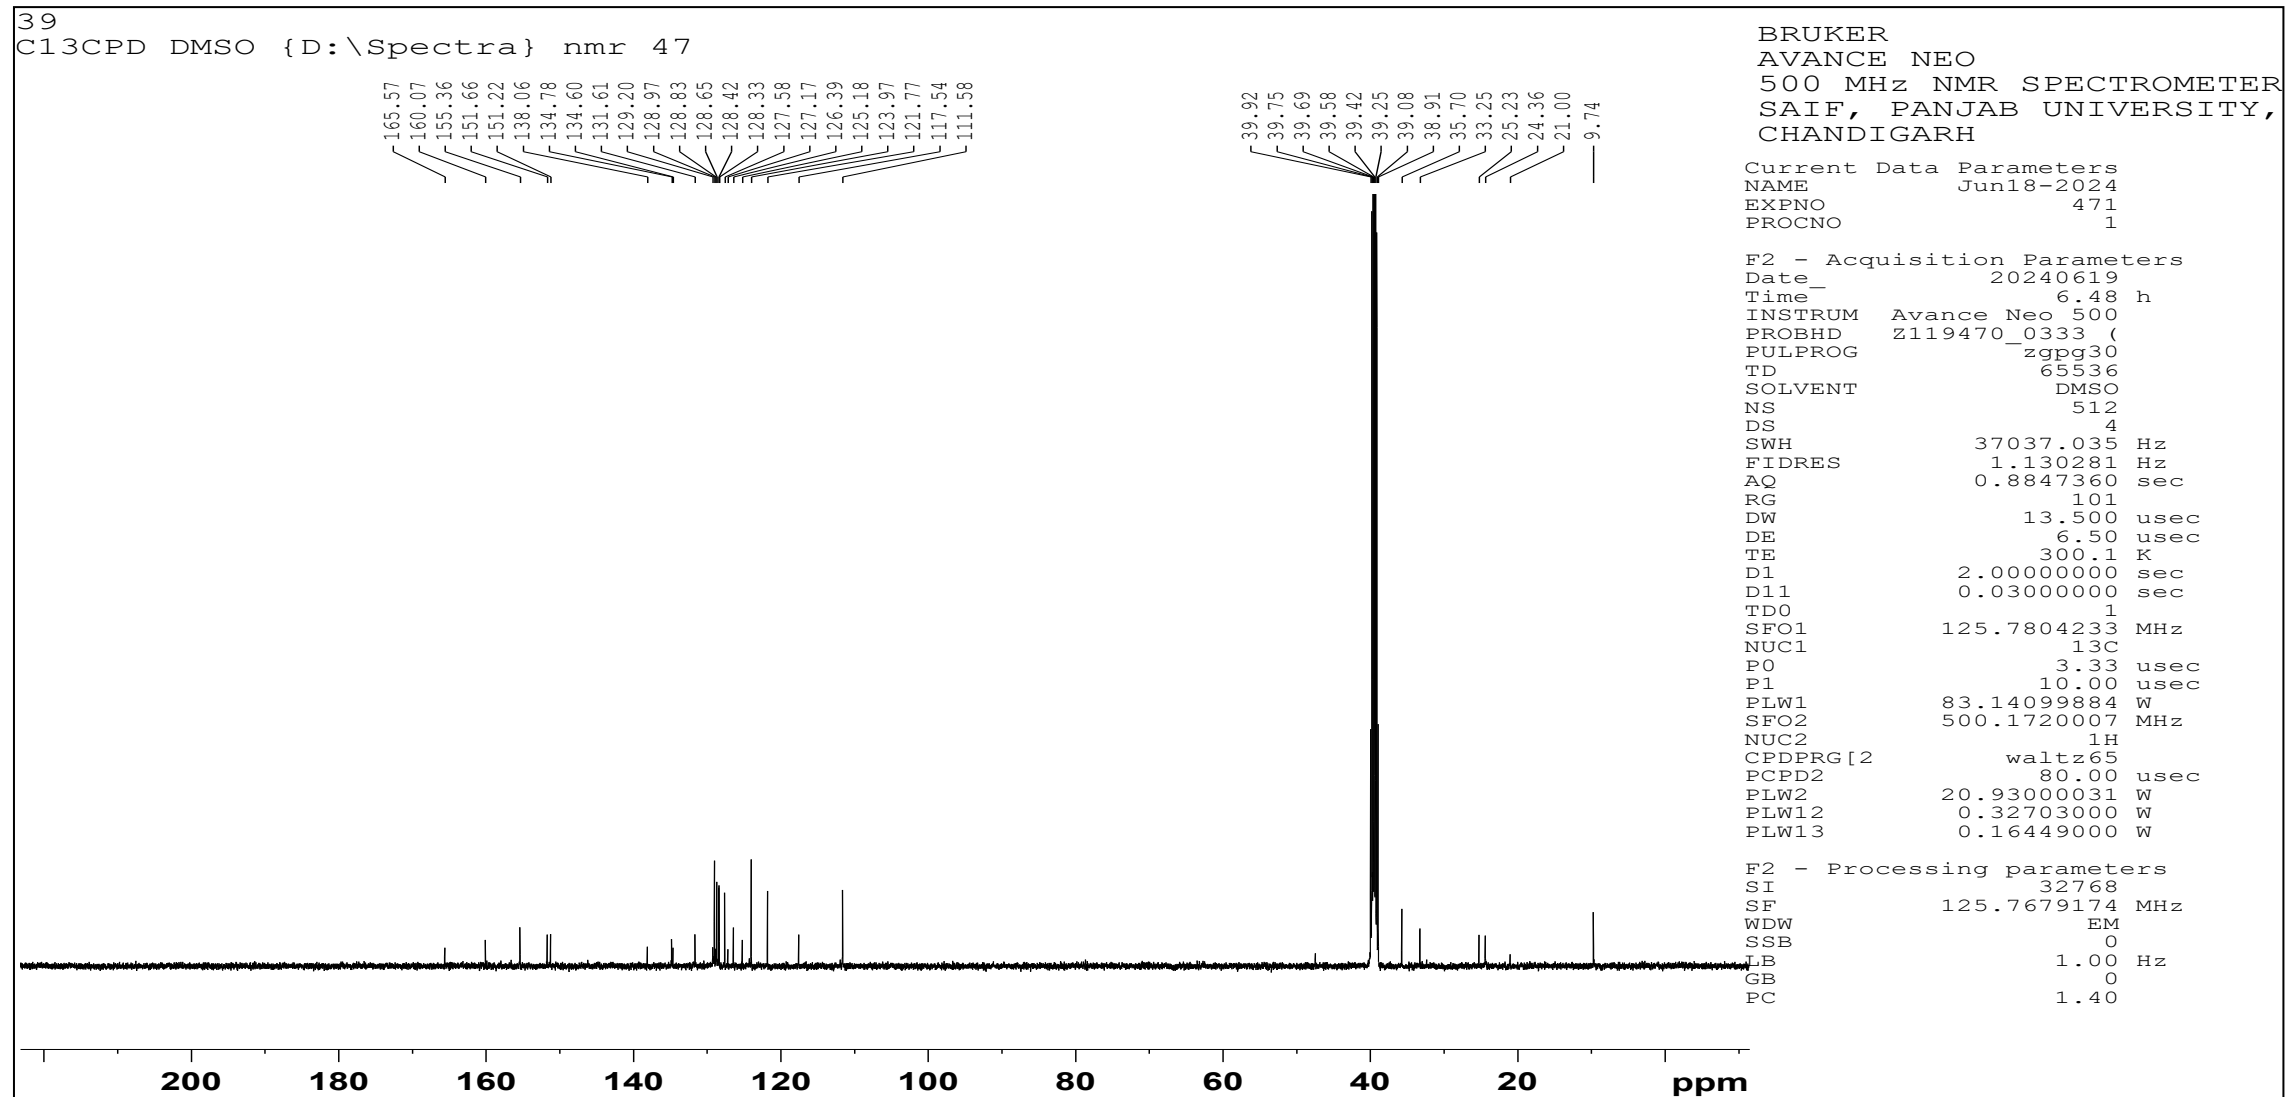

Figure S21. <sup>13</sup>C NMR spectrum of compound 6g

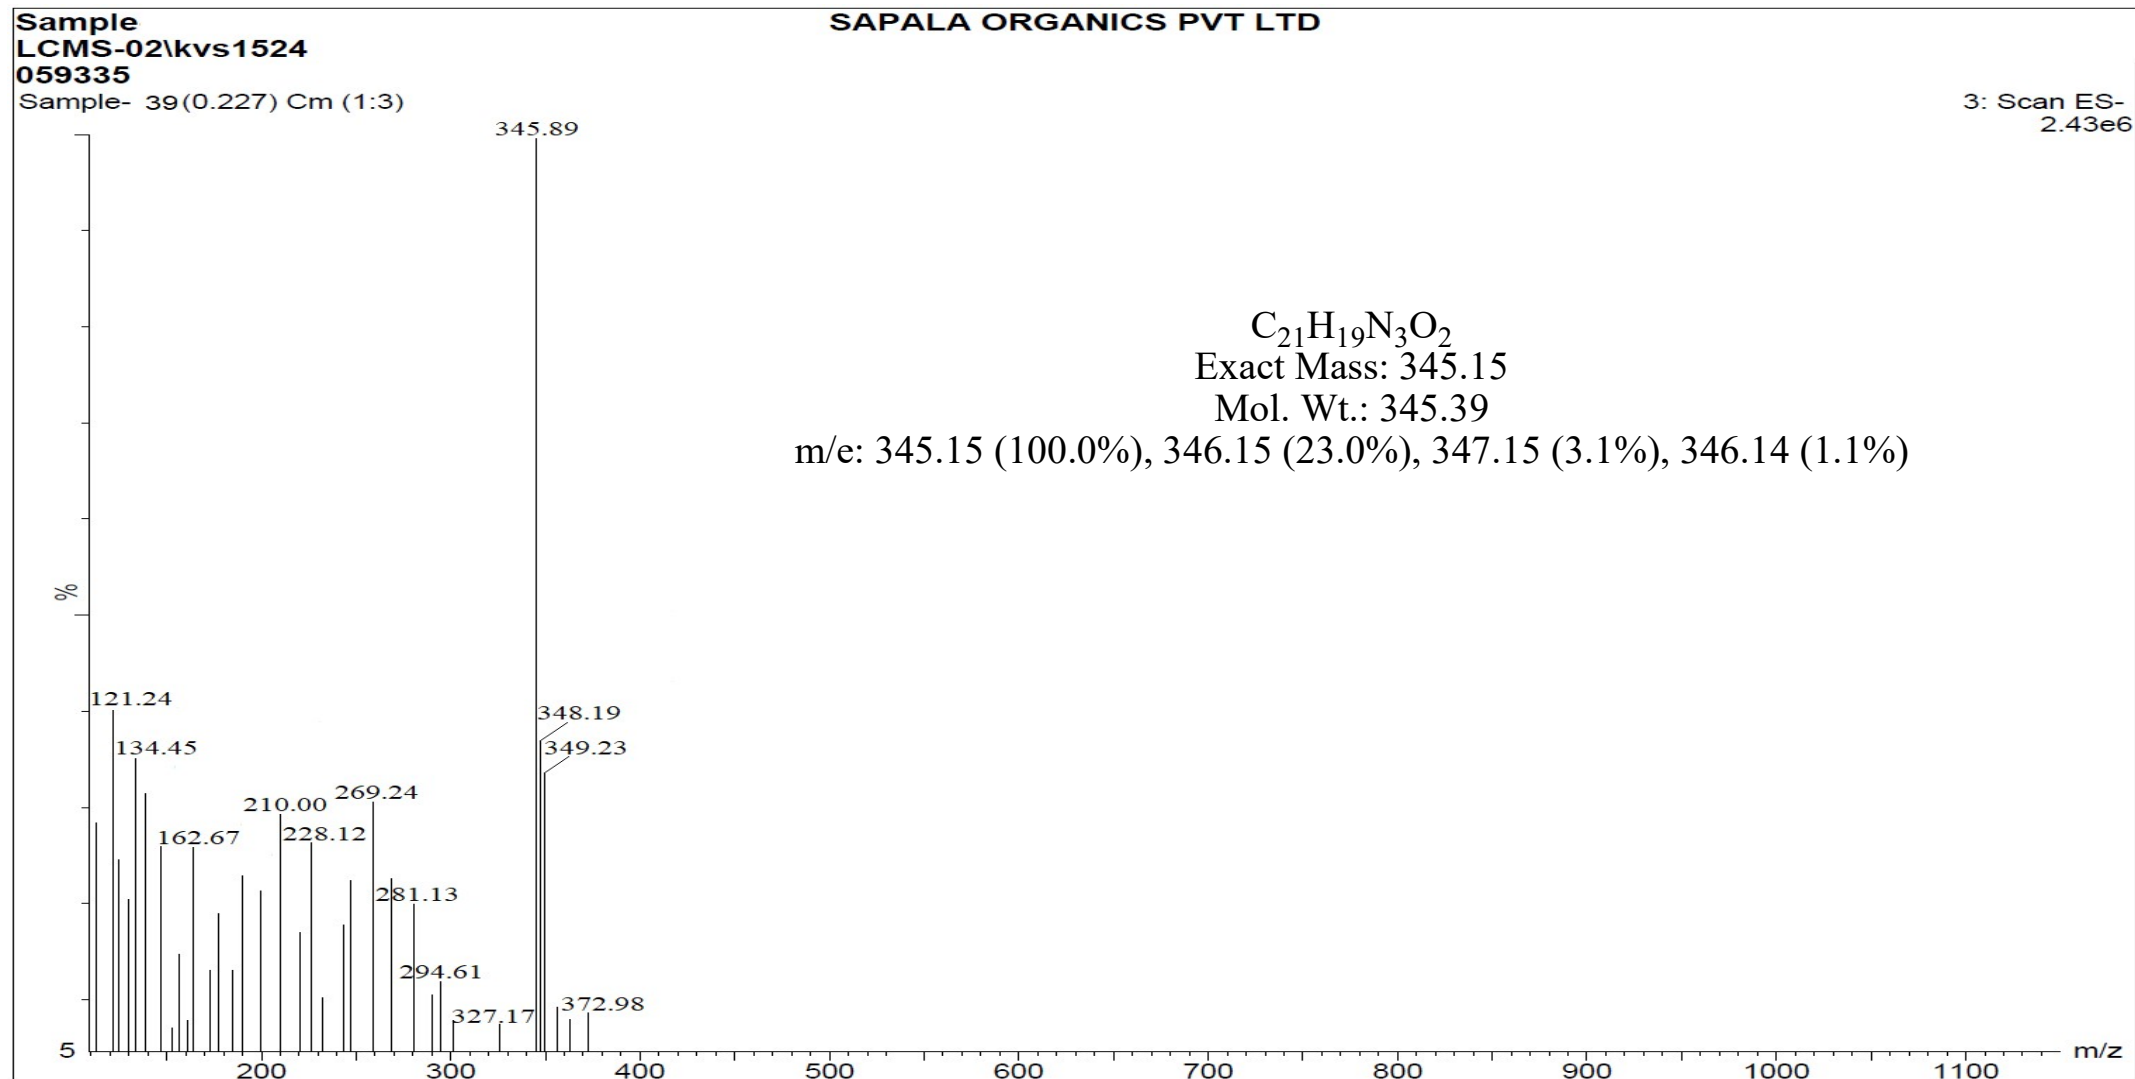

Figure S22. Mass spectrum of compound 6g



## Supporting Information

### Contents

- 1) Table **D1**. The docking scores of native ligand and novel derivatives with aromatase enzyme.
- 2) Table **D2**. The interaction details of the native ligand molecule with the binding site residues.
- 3) Table **D3**. The interaction details of the designed molecules (**D1-20**) with the binding site residues.

**Table D1.** The docking scores of native ligand and novel derivatives with aromatase enzyme

| Compound Code |                                                                                    | Ligand Energy (kcal/mol) | Binding energy (kcal/mol) | rmsd/ub | rmsd/lb |
|---------------|------------------------------------------------------------------------------------|--------------------------|---------------------------|---------|---------|
| Native Ligand | 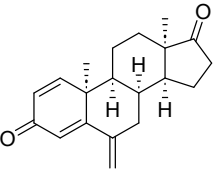 | 1113.62                  | -8.9                      | 0       | 0       |
|               |                                                                                    |                          | -8.8                      | 3.765   | 2.54    |
|               |                                                                                    |                          | -8.8                      | 6.864   | 1.751   |
|               |                                                                                    |                          | -8.7                      | 5.027   | 3.134   |
|               |                                                                                    |                          | -8.7                      | 6.537   | 1.282   |
|               |                                                                                    |                          | -8.7                      | 6.557   | 1.519   |
|               |                                                                                    |                          | -8.2                      | 7.204   | 4.375   |
|               |                                                                                    |                          | -7.8                      | 6.447   | 2.492   |

|            |                                                                                    |        |      |        |        |
|------------|------------------------------------------------------------------------------------|--------|------|--------|--------|
|            |                                                                                    |        | -7.6 | 18.619 | 16.842 |
| <b>D1.</b> | 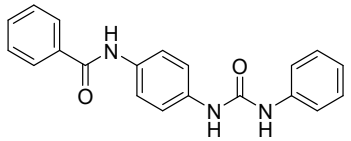  | 250.47 | -8.4 | 0      | 0      |
|            |                                                                                    |        | -8.3 | 2.304  | 1.876  |
|            |                                                                                    |        | -7.8 | 10.72  | 1.767  |
|            |                                                                                    |        | -7.4 | 19.8   | 18.345 |
|            |                                                                                    |        | -7.1 | 24.381 | 18.503 |
|            |                                                                                    |        | -7   | 22.241 | 18.557 |
|            |                                                                                    |        | -6.7 | 24.457 | 22.368 |
|            |                                                                                    |        | -6.7 | 25.452 | 19.957 |
|            |                                                                                    |        | -6.6 | 24.166 | 20.094 |
| <b>D2.</b> |  | 277.44 | -8.4 | 0      | 0      |
|            |                                                                                    |        | -8.2 | 10.689 | 1.336  |
|            |                                                                                    |        | -8.2 | 10.814 | 1.941  |
|            |                                                                                    |        | -8.1 | 2.303  | 1.633  |
|            |                                                                                    |        | -7.3 | 21.399 | 18.674 |
|            |                                                                                    |        | -7.2 | 18.727 | 16.332 |
|            |                                                                                    |        | -7.1 | 24.172 | 18.663 |

|            |                                                                                    |        |      |        |        |
|------------|------------------------------------------------------------------------------------|--------|------|--------|--------|
|            |                                                                                    |        | -6.9 | 22.569 | 19.257 |
|            |                                                                                    |        | -6.9 | 26.972 | 22.353 |
| <b>D3.</b> | 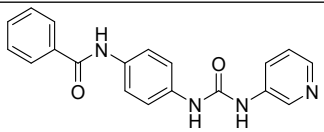  | 287.84 | -8.2 | 0      | 0      |
|            |                                                                                    |        | -7.2 | 22.603 | 18.82  |
|            |                                                                                    |        | -7.2 | 20.674 | 19.006 |
|            |                                                                                    |        | -7.1 | 21.194 | 19.308 |
|            |                                                                                    |        | -7.1 | 20.902 | 19.717 |
|            |                                                                                    |        | -6.9 | 21.297 | 20.229 |
|            |                                                                                    |        | -6.8 | 24.83  | 19.862 |
|            |                                                                                    |        | -6.7 | 23.984 | 19.451 |
|            |                                                                                    |        | -6.6 | 21.957 | 20.155 |
| <b>D4.</b> |  | 275.03 | -8   | 0      | 0      |
|            |                                                                                    |        | -7.9 | 10.801 | 2.172  |
|            |                                                                                    |        | -7.9 | 19.154 | 13.894 |
|            |                                                                                    |        | -7.8 | 2.333  | 2.109  |
|            |                                                                                    |        | -7.2 | 10.711 | 1.722  |
|            |                                                                                    |        | -7.2 | 20.74  | 19.516 |

|            |                                                                                     |        |      |        |        |
|------------|-------------------------------------------------------------------------------------|--------|------|--------|--------|
|            |                                                                                     |        | -7.1 | 20.906 | 19.589 |
|            |                                                                                     |        | -7.1 | 6.461  | 5.216  |
|            |                                                                                     |        | -7   | 22.74  | 19.232 |
| <b>D5.</b> | 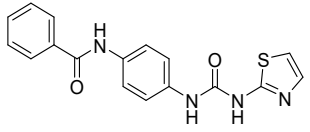   | 458.41 | -8   | 0      | 0      |
|            |                                                                                     |        | -7.7 | 10.566 | 3.42   |
|            |                                                                                     |        | -7.3 | 19.374 | 14.45  |
|            |                                                                                     |        | -7.3 | 19.355 | 16.393 |
|            |                                                                                     |        | -7   | 20.809 | 19.544 |
|            |                                                                                     |        | -7   | 16.296 | 14.836 |
|            |                                                                                     |        | -6.8 | 25.115 | 22.859 |
|            |                                                                                     |        | -6.8 | 22.589 | 19.141 |
|            |                                                                                     |        | -6.7 | 20.96  | 19.247 |
| <b>D6.</b> |  | 575.4  | -7.2 | 0      | 0      |
|            |                                                                                     |        | -7.1 | 12.602 | 4.131  |
|            |                                                                                     |        | -7   | 40.393 | 39.872 |
|            |                                                                                     |        | -7   | 29.199 | 27.281 |
|            |                                                                                     |        | -6.9 | 40.584 | 39.852 |

|            |                                                                                     |        |      |        |        |
|------------|-------------------------------------------------------------------------------------|--------|------|--------|--------|
|            |                                                                                     |        | -6.9 | 19.892 | 17.711 |
|            |                                                                                     |        | -6.9 | 8.695  | 5.519  |
|            |                                                                                     |        | -6.8 | 7.773  | 4.861  |
|            |                                                                                     |        | -6.7 | 22.856 | 20.769 |
| <b>D7.</b> | 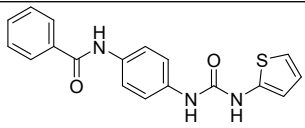   | 402.26 | -8.1 | 0      | 0      |
|            |                                                                                     |        | -7.9 | 2.286  | 2.102  |
|            |                                                                                     |        | -7.7 | 10.592 | 3.314  |
|            |                                                                                     |        | -7.3 | 10.346 | 2.939  |
|            |                                                                                     |        | -7.2 | 20.58  | 19.428 |
|            |                                                                                     |        | -7.1 | 20.378 | 18.959 |
|            |                                                                                     |        | -6.5 | 23.688 | 19.474 |
|            |                                                                                     |        | -6.5 | 20.759 | 18.756 |
|            |                                                                                     |        | -6.4 | 25.548 | 23.804 |
| <b>D8.</b> |  | 420.02 | -8.3 | 0      | 0      |
|            |                                                                                     |        | -8.2 | 10.24  | 1.61   |
|            |                                                                                     |        | -7.6 | 19.302 | 14.387 |
|            |                                                                                     |        | -7.5 | 20.366 | 18.943 |

|             |                                                                                     |        |      |        |        |
|-------------|-------------------------------------------------------------------------------------|--------|------|--------|--------|
|             |                                                                                     |        | -7.5 | 10.411 | 2.324  |
|             |                                                                                     |        | -7.1 | 21.3   | 19.535 |
|             |                                                                                     |        | -7.1 | 20.766 | 19.352 |
|             |                                                                                     |        | -7.1 | 20.834 | 18.352 |
|             |                                                                                     |        | -7   | 20.292 | 17.322 |
| <b>D9.</b>  | 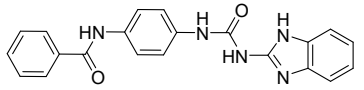   | 514.81 | -7.9 | 0      | 0      |
|             |                                                                                     |        | -7.7 | 26.911 | 22.644 |
|             |                                                                                     |        | -7.6 | 20.553 | 18.832 |
|             |                                                                                     |        | -7.6 | 18.179 | 14.673 |
|             |                                                                                     |        | -7.5 | 37.06  | 32.877 |
|             |                                                                                     |        | -7.5 | 32.162 | 30.301 |
|             |                                                                                     |        | -7.3 | 20.07  | 16.226 |
|             |                                                                                     |        | -7.3 | 24.679 | 22.528 |
|             |                                                                                     |        | -7.2 | 18.587 | 14.365 |
| <b>D10.</b> |  | 528.5  | -7.9 | 0      | 0      |
|             |                                                                                     |        | -7.7 | 22.503 | 19.843 |
|             |                                                                                     |        | -7.6 | 23.813 | 19.079 |

|             |                                                                                     |        |      |        |        |
|-------------|-------------------------------------------------------------------------------------|--------|------|--------|--------|
|             |                                                                                     |        | -7.5 | 12.06  | 2.386  |
|             |                                                                                     |        | -7.5 | 30.251 | 28.76  |
|             |                                                                                     |        | -7.5 | 15.595 | 14.786 |
|             |                                                                                     |        | -7.4 | 26.682 | 24.898 |
|             |                                                                                     |        | -7.2 | 26.249 | 23.68  |
|             |                                                                                     |        | -7.2 | 41.226 | 39.692 |
| <b>D11.</b> | 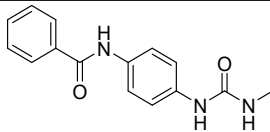   | 175.12 | -7.8 | 0      | 0      |
|             |                                                                                     |        | -7.5 | 9.553  | 5.698  |
|             |                                                                                     |        | -7.5 | 8.72   | 4.79   |
|             |                                                                                     |        | -7.4 | 6.825  | 6.016  |
|             |                                                                                     |        | -7.2 | 24.659 | 22.792 |
|             |                                                                                     |        | -7.1 | 5.347  | 4.766  |
|             |                                                                                     |        | -7   | 5.778  | 4.846  |
|             |                                                                                     |        | -6.9 | 8.952  | 4.601  |
|             |                                                                                     |        | -6.9 | 14.612 | 12.003 |
| <b>D12.</b> |  | 174.28 | -7.4 | 0      | 0      |
|             |                                                                                     |        | -7.1 | 2.761  | 2.007  |

|             |                                                                                     |        |      |        |        |
|-------------|-------------------------------------------------------------------------------------|--------|------|--------|--------|
|             |                                                                                     |        | -7   | 2.33   | 1.699  |
|             |                                                                                     |        | -7   | 9.584  | 2.255  |
|             |                                                                                     |        | -6.9 | 2.581  | 2.11   |
|             |                                                                                     |        | -6.8 | 19.439 | 18.763 |
|             |                                                                                     |        | -6.6 | 16.176 | 14.997 |
|             |                                                                                     |        | -6.4 | 20.52  | 19.093 |
|             |                                                                                     |        | -6.3 | 3.159  | 2.862  |
| <b>D13.</b> | 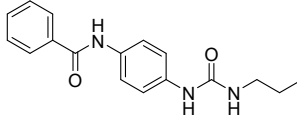   | 172.5  | -6.4 | 0      | 0      |
|             |                                                                                     |        | -6.4 | 24.434 | 19.909 |
|             |                                                                                     |        | -6.3 | 10.324 | 4.165  |
|             |                                                                                     |        | -6.1 | 28.169 | 26.124 |
|             |                                                                                     |        | -6   | 22.707 | 18.682 |
|             |                                                                                     |        | -6   | 9.638  | 1.426  |
|             |                                                                                     |        | -5.9 | 20.669 | 18.877 |
|             |                                                                                     |        | -5.9 | 17.591 | 15.4   |
|             |                                                                                     |        | -5.8 | 50.408 | 49.202 |
| <b>D14.</b> |  | 177.15 | -7.9 | 0      | 0      |
| 40          |                                                                                     |        |      |        |        |



|             |                                                                                   |        |      |        |        |
|-------------|-----------------------------------------------------------------------------------|--------|------|--------|--------|
|             |                                                                                   |        | -7.2 | 9.686  | 1.948  |
|             |                                                                                   |        | -7.1 | 9.38   | 1.245  |
|             |                                                                                   |        | -6.7 | 19.059 | 14.96  |
|             |                                                                                   |        | -6.7 | 1.908  | 1.656  |
|             |                                                                                   |        | -6.7 | 9.46   | 1.856  |
|             |                                                                                   |        | -6.6 | 19.667 | 18.187 |
|             |                                                                                   |        | -6.3 | 22.288 | 18.368 |
|             |                                                                                   |        | -6.1 | 2.904  | 1.93   |
| <b>D15.</b> | 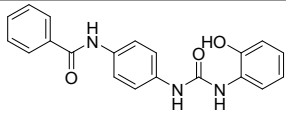 | 274.78 | -7.9 | 0      | 0      |
|             |                                                                                   |        | -7.9 | 15.961 | 13.92  |
|             |                                                                                   |        | -7.2 | 39.269 | 33.961 |
|             |                                                                                   |        | -7.1 | 37.415 | 31.546 |
|             |                                                                                   |        | -7.1 | 32.608 | 30.701 |
|             |                                                                                   |        | -7.1 | 41.767 | 37.631 |
|             |                                                                                   |        | -7   | 37.195 | 32.464 |
|             |                                                                                   |        | -6.7 | 38.521 | 34.046 |
|             |                                                                                   |        | -6.6 | 29.459 | 24.572 |

|             |                                                                                   |        |      |        |        |
|-------------|-----------------------------------------------------------------------------------|--------|------|--------|--------|
| <b>D16.</b> | 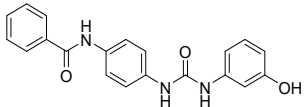 | 284.12 | -8.6 | 0      | 0      |
|             |                                                                                   |        | -8.4 | 10.979 | 1.642  |
|             |                                                                                   |        | -8.2 | 2.275  | 1.861  |
|             |                                                                                   |        | -7.3 | 20.235 | 18.843 |
|             |                                                                                   |        | -7.2 | 22.241 | 21.138 |
|             |                                                                                   |        | -7.1 | 21.702 | 20.314 |
|             |                                                                                   |        | -7.1 | 22.496 | 18.821 |
|             |                                                                                   |        | -7.1 | 24.277 | 20.133 |
|             |                                                                                   |        | -6.8 | 6.579  | 5.905  |
| <b>D17.</b> |  | 300.1  | -8.3 | 0      | 0      |
|             |                                                                                   |        | -8   | 2.309  | 1.881  |
|             |                                                                                   |        | -7.4 | 22.416 | 18.825 |
|             |                                                                                   |        | -7.2 | 21.904 | 20.505 |
|             |                                                                                   |        | -7.2 | 20.799 | 18.921 |
|             |                                                                                   |        | -7.1 | 22.719 | 21.65  |
|             |                                                                                   |        | -7   | 24.465 | 22.414 |
|             |                                                                                   |        | -6.8 | 25.3   | 19.649 |

|             |                                                                                    |        |      |        |        |
|-------------|------------------------------------------------------------------------------------|--------|------|--------|--------|
|             |                                                                                    |        | -6.8 | 22.332 | 19.648 |
| <b>D18.</b> | 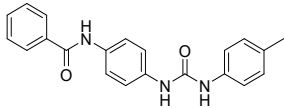  | 276.5  | -8.7 | 0      | 0      |
|             |                                                                                    |        | -8.3 | 10.719 | 1.268  |
|             |                                                                                    |        | -7.6 | 20.11  | 18.239 |
|             |                                                                                    |        | -7.4 | 22.199 | 18.458 |
|             |                                                                                    |        | -6.9 | 24.976 | 19.417 |
|             |                                                                                    |        | -6.9 | 24.276 | 22.259 |
|             |                                                                                    |        | -6.9 | 20.396 | 19.101 |
|             |                                                                                    |        | -6.9 | 22.375 | 20.75  |
|             |                                                                                    |        | -6.8 | 20.54  | 18.712 |
| <b>D19.</b> |  | 275.96 | -8.6 | 0      | 0      |
|             |                                                                                    |        | -8.2 | 10.683 | 0.992  |
|             |                                                                                    |        | -8.1 | 2.227  | 1.636  |
|             |                                                                                    |        | -8   | 19.124 | 13.728 |
|             |                                                                                    |        | -7.2 | 21.15  | 19.111 |
|             |                                                                                    |        | -7.2 | 19.663 | 14.623 |
|             |                                                                                    |        | -7.2 | 10.807 | 1.696  |

|             |                                                                                                                           |        |      |        |        |
|-------------|---------------------------------------------------------------------------------------------------------------------------|--------|------|--------|--------|
|             |                                                                                                                           |        | -7.1 | 21.301 | 19.403 |
|             |                                                                                                                           |        | -7   | 7.15   | 5.169  |
| <b>D20.</b> | 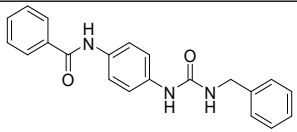<br><chem>O=C(Nc1ccccc1)Nc2ccccc2</chem> | 227.72 | -8.6 | 0      | 0      |
|             |                                                                                                                           |        | -8.4 | 3.013  | 2.467  |
|             |                                                                                                                           |        | -8.3 | 1.699  | 1.362  |
|             |                                                                                                                           |        | -7.8 | 10.744 | 1.543  |
|             |                                                                                                                           |        | -7.4 | 21.898 | 20.411 |
|             |                                                                                                                           |        | -7.3 | 10.279 | 1.891  |
|             |                                                                                                                           |        | -7.3 | 21.079 | 19.93  |
|             |                                                                                                                           |        | -7.3 | 19.509 | 18.169 |
|             |                                                                                                                           |        | -7.1 | 19.801 | 18.133 |

**Table D2.** The interaction details of the native ligand molecule with the binding site residues.

| Active Amino Acid Residue | Atom from Ligand | Bond Length (Å) | Bond Category | Bond Type |
|---------------------------|------------------|-----------------|---------------|-----------|
| <b>Native Ligand</b>      |                  |                 |               |           |
| A:ILE133                  | Alkyl            | 4.78            | Hydrophobic   | Alkyl     |
| A:CYS437                  | Alkyl            | 3.59            | Hydrophobic   | Alkyl     |
| A:VAL370                  | Alkyl            | 3.91            | Hydrophobic   | Alkyl     |
| A:ALA306                  | Alkyl            | 4.12            | Hydrophobic   | Alkyl     |
| A:ILE133                  | Alkyl            | 4.00            | Hydrophobic   | Alkyl     |
| A:ALA306                  | Alkyl            | 5.25            | Hydrophobic   | Alkyl     |
| A:TRP224                  | Pi-Orbitals      | 5.23            | Hydrophobic   | Pi-Alkyl  |

**Table D3.** The interaction details of the designed molecules with the binding site residues.

| Active Amino Acid Residue | Atom from Ligand | Bond Length (Å <sup>0</sup> ) | Bond Category | Bond Type |
|---------------------------|------------------|-------------------------------|---------------|-----------|
| <b>D1</b>                 |                  |                               |               |           |
| A:LEU152                  | C-H              | 3.59141                       | Hydrophobic   | Pi-Sigma  |
| A:MET374                  | Sulfur           | 5.18676                       | Other         | Pi-Sulfur |
| A:MET446                  | Sulfur           | 5.7763                        | Other         | Pi-Sulfur |
| A:ILE133                  | Pi-Orbitals      | 4.73032                       | Hydrophobic   | Pi-Alkyl  |
| A:CYS437                  | Pi-Orbitals      | 5.02222                       | Hydrophobic   | Pi-Alkyl  |
| A:ALA306                  | Pi-Orbitals      | 4.43544                       | Hydrophobic   | Pi-Alkyl  |
| A:ALA307                  | Pi-Orbitals      | 4.86199                       | Hydrophobic   | Pi-Alkyl  |
| <b>D2</b>                 |                  |                               |               |           |
| A:LEU152                  | C-H              | 3.60212                       | Hydrophobic   | Pi-Sigma  |
| A:MET446                  | Sulfur           | 5.69567                       | Other         | Pi-Sulfur |

|           |             |         |               |                            |
|-----------|-------------|---------|---------------|----------------------------|
| A:MET374  | Alkyl       | 4.95459 | Hydrophobic   | Alkyl                      |
| A:ILE133  | Pi-Orbitals | 5.07191 | Hydrophobic   | Pi-Alkyl                   |
| A:ALA306  | Pi-Orbitals | 4.81635 | Hydrophobic   | Pi-Alkyl                   |
| A:CYS437  | Pi-Orbitals | 5.02515 | Hydrophobic   | Pi-Alkyl                   |
| A:ALA306  | Pi-Orbitals | 4.47315 | Hydrophobic   | Pi-Alkyl                   |
| A:ALA307  | Pi-Orbitals | 4.8061  | Hydrophobic   | Pi-Alkyl                   |
| A:PHE134  | Pi-Orbitals | 5.08734 | Hydrophobic   | Pi-Alkyl                   |
| <b>D3</b> |             |         |               |                            |
| A:THR310  | H           | 2.998   | Hydrogen Bond | Conventional Hydrogen Bond |
| A:ALA306  | H           | 2.52969 | Hydrogen Bond | Conventional Hydrogen Bond |
| A:THR310  | H           | 2.00243 | Hydrogen Bond | Conventional Hydrogen Bond |
| A:THR310  | C-H         | 3.71566 | Hydrophobic   | Pi-Sigma                   |
| A:MET374  | Sulfur      | 5.1018  | Other         | Pi-Sulfur                  |
| A:VAL370  | Pi-Orbitals | 5.23308 | Hydrophobic   | Pi-Alkyl                   |
| <b>D4</b> |             |         |               |                            |
| A:ALA306  | H           | 2.58921 | Hydrogen Bond | Conventional Hydrogen Bond |
| A:THR310  | H           | 1.99588 | Hydrogen Bond | Conventional Hydrogen Bond |

|           |             |         |               |                            |
|-----------|-------------|---------|---------------|----------------------------|
| A:THR310  | C-H         | 3.76289 | Hydrophobic   | Pi-Sigma                   |
| A:MET446  | C-H         | 3.82147 | Hydrophobic   | Pi-Sigma                   |
| A:MET374  | Sulfur      | 5.15429 | Other         | Pi-Sulfur                  |
| A:VAL370  | Pi-Orbitals | 5.34159 | Hydrophobic   | Pi-Alkyl                   |
| A:LEU152  | Pi-Orbitals | 5.1788  | Hydrophobic   | Pi-Alkyl                   |
| A:ALA306  | Pi-Orbitals | 4.76943 | Hydrophobic   | Pi-Alkyl                   |
| A:ALA307  | Pi-Orbitals | 4.29899 | Hydrophobic   | Pi-Alkyl                   |
| A:ILE442  | Pi-Orbitals | 5.36139 | Hydrophobic   | Pi-Alkyl                   |
| <b>D5</b> |             |         |               |                            |
| A:THR310  | H           | 2.90166 | Hydrogen Bond | Conventional Hydrogen Bond |
| A:ALA306  | H           | 2.73553 | Hydrogen Bond | Conventional Hydrogen Bond |
| A:THR310  | H           | 1.95289 | Hydrogen Bond | Conventional Hydrogen Bond |
| A:THR310  | C-H         | 3.83414 | Hydrophobic   | Pi-Sigma                   |
| A:MET446  | C-H         | 3.96889 | Hydrophobic   | Pi-Sigma                   |
| A:MET374  | Sulfur      | 5.05165 | Other         | Pi-Sulfur                  |
| A:VAL370  | Pi-Orbitals | 5.24051 | Hydrophobic   | Pi-Alkyl                   |
| A:LEU152  | Pi-Orbitals | 5.3237  | Hydrophobic   | Pi-Alkyl                   |



|                  |             |         |               |                            |
|------------------|-------------|---------|---------------|----------------------------|
| A:ALA306         | Pi-Orbitals | 4.51771 | Hydrophobic   | Pi-Alkyl                   |
| A:ALA307         | Pi-Orbitals | 4.24055 | Hydrophobic   | Pi-Alkyl                   |
| <b>D6</b>        |             |         |               |                            |
| A:GLY117         | O           | 2.46014 | Hydrogen Bond | Conventional Hydrogen Bond |
| A:LYS376         | O           | 2.27727 | Hydrogen Bond | Conventional Hydrogen Bond |
| A:LYS376         | Positive    | 4.13478 | Electrostatic | Pi-Cation                  |
| A:GLU92          | Negative    | 3.5594  | Electrostatic | Pi-Anion                   |
| A:GLY117; SER118 | Amide       | 3.63876 | Hydrophobic   | Amide-Pi Stacked           |
| A:LYS376         | Pi-Orbitals | 5.48565 | Hydrophobic   | Pi-Alkyl                   |
| A:PRO138         | Pi-Orbitals | 4.01776 | Hydrophobic   | Pi-Alkyl                   |
| <b>D7</b>        |             |         |               |                            |
| A:THR310         | H           | 2.96757 | Hydrogen Bond | Conventional Hydrogen Bond |
| A:ALA306         | H           | 2.62519 | Hydrogen Bond | Conventional Hydrogen Bond |
| A:THR310         | H           | 1.87699 | Hydrogen Bond | Conventional Hydrogen Bond |
| A:THR310         | C-H         | 3.89798 | Hydrophobic   | Pi-Sigma                   |
| A:MET446         | C-H         | 3.92962 | Hydrophobic   | Pi-Sigma                   |
| A:MET374         | Sulfur      | 5.11903 | Other         | Pi-Sulfur                  |

|           |             |         |               |                            |
|-----------|-------------|---------|---------------|----------------------------|
| A:VAL370  | Pi-Orbitals | 5.38799 | Hydrophobic   | Pi-Alkyl                   |
| A:LEU152  | Pi-Orbitals | 5.23351 | Hydrophobic   | Pi-Alkyl                   |
| A:ALA306  | Pi-Orbitals | 4.61904 | Hydrophobic   | Pi-Alkyl                   |
| A:ALA307  | Pi-Orbitals | 4.30702 | Hydrophobic   | Pi-Alkyl                   |
| <b>D8</b> |             |         |               |                            |
| A:ALA306  | H           | 3.07047 | Hydrogen Bond | Conventional Hydrogen Bond |
| A:THR310  | H           | 2.12731 | Hydrogen Bond | Conventional Hydrogen Bond |
| A:THR310  | C-H         | 3.72459 | Hydrophobic   | Pi-Sigma                   |
| A:MET374  | Sulfur      | 5.14288 | Other         | Pi-Sulfur                  |
| A:MET446  | Sulfur      | 5.48999 | Other         | Pi-Sulfur                  |
| A:VAL370  | Pi-Orbitals | 5.16372 | Hydrophobic   | Pi-Alkyl                   |
| A:LEU152  | Pi-Orbitals | 5.28988 | Hydrophobic   | Pi-Alkyl                   |
| A:ALA306  | Pi-Orbitals | 4.17509 | Hydrophobic   | Pi-Alkyl                   |
| A:ALA307  | Pi-Orbitals | 4.22316 | Hydrophobic   | Pi-Alkyl                   |
| <b>D9</b> |             |         |               |                            |
| A:CYS124  | H           | 2.62578 | Hydrogen Bond | Conventional Hydrogen Bond |
| A:CYS124  | H           | 1.96848 | Hydrogen Bond | Conventional Hydrogen Bond |

|                  |             |         |               |                            |
|------------------|-------------|---------|---------------|----------------------------|
| A:TYR241         | HH          | 2.54449 | Hydrogen Bond | Conventional Hydrogen Bond |
| A:CYS124         | Sulfur      | 5.56438 | Other         | Pi-Sulfur                  |
| A:TYR241         | Pi-Orbitals | 5.34825 | Hydrophobic   | Pi-Pi Stacked              |
| A:PHE235; LYS236 | Amide       | 3.85212 | Hydrophobic   | Amide-Pi Stacked           |
| A:VAL248         | Pi-Orbitals | 5.46931 | Hydrophobic   | Pi-Alkyl                   |
| A:LYS249         | Pi-Orbitals | 4.6032  | Hydrophobic   | Pi-Alkyl                   |
| A:LYS236         | Pi-Orbitals | 4.92931 | Hydrophobic   | Pi-Alkyl                   |
| <b>D10</b>       |             |         |               |                            |
| A:GLY117         | H           | 2.0319  | Hydrogen Bond | Conventional Hydrogen Bond |
| A:GLY117         | H           | 2.67471 | Hydrogen Bond | Conventional Hydrogen Bond |
| A:GLU129         | NH          | 2.5366  | Hydrogen Bond | Conventional Hydrogen Bond |
| A:ASN136         | H           | 2.55066 | Hydrogen Bond | Conventional Hydrogen Bond |
| A:GLU92          | Negative    | 4.05003 | Electrostatic | Pi-Anion                   |
| A:LYS119         | NH          | 3.08756 | Hydrogen Bond | Pi-Donor Hydrogen Bond     |
| <b>D11</b>       |             |         |               |                            |
| A:THR310         | H           | 2.73917 | Hydrogen Bond | Conventional Hydrogen Bond |
| A:PRO429         | H           | 2.16876 | Hydrogen Bond | Conventional Hydrogen Bond |

|            |             |         |               |                            |
|------------|-------------|---------|---------------|----------------------------|
| A:PRO429   | H           | 2.33609 | Hydrogen Bond | Conventional Hydrogen Bond |
| A:VAL370   | O           | 2.77996 | Hydrogen Bond | Conventional Hydrogen Bond |
| A:ALA306   | C-H         | 3.89756 | Hydrophobic   | Pi-Sigma                   |
| A:MET303   | Sulfur      | 5.44002 | Other         | Pi-Sulfur                  |
| A:VAL370   | Pi-Orbitals | 5.31721 | Hydrophobic   | Pi-Alkyl                   |
| A:CYS437   | Pi-Orbitals | 4.78236 | Hydrophobic   | Pi-Alkyl                   |
| A:ALA443   | Pi-Orbitals | 5.36601 | Hydrophobic   | Pi-Alkyl                   |
| A:LEU152   | Pi-Orbitals | 5.46632 | Hydrophobic   | Pi-Alkyl                   |
| A:ALA307   | Pi-Orbitals | 4.55727 | Hydrophobic   | Pi-Alkyl                   |
| <b>D12</b> |             |         |               |                            |
| A:ALA306   | H           | 2.48419 | Hydrogen Bond | Conventional Hydrogen Bond |
| A:THR310   | H           | 1.97834 | Hydrogen Bond | Conventional Hydrogen Bond |
| A:THR310   | C-H         | 3.85939 | Hydrophobic   | Pi-Sigma                   |
| A:MET374   | Sulfur      | 5.6163  | Other         | Pi-Sulfur                  |
| A:ALA306   | Pi-Orbitals | 5.0647  | Hydrophobic   | Pi-Alkyl                   |
| <b>D13</b> |             |         |               |                            |
| A:GLU129   | H           | 3.03697 | Hydrogen Bond | Conventional Hydrogen Bond |

|            |             |         |               |                            |
|------------|-------------|---------|---------------|----------------------------|
| A:LYS376   | O           | 2.24868 | Hydrogen Bond | Conventional Hydrogen Bond |
| A:GLU92    | Negative    | 3.36261 | Electrostatic | Pi-Anion                   |
| A:LYS119   | Pi-Orbitals | 5.16566 | Hydrophobic   | Pi-Alkyl                   |
| <b>D14</b> |             |         |               |                            |
| A:ALA306   | H           | 2.34066 | Hydrogen Bond | Conventional Hydrogen Bond |
| A:THR310   | C-H         | 3.75713 | Hydrophobic   | Pi-Sigma                   |
| A:MET374   | Sulfur      | 5.15477 | Other         | Pi-Sulfur                  |
| A:ALA306   | Pi-Orbitals | 5.2536  | Hydrophobic   | Pi-Alkyl                   |
| <b>D15</b> |             |         |               |                            |
| A:TYR361   | H           | 2.65387 | Hydrogen Bond | Conventional Hydrogen Bond |
| A:MET444   | Pi-Orbitals | 5.0067  | Hydrophobic   | Pi-Alkyl                   |
| A:PRO429   | Pi-Orbitals | 5.00342 | Hydrophobic   | Pi-Alkyl                   |
| A:ILE347   | Pi-Orbitals | 5.37876 | Hydrophobic   | Pi-Alkyl                   |
| A:ILE350   | Pi-Orbitals | 5.04232 | Hydrophobic   | Pi-Alkyl                   |
| <b>D16</b> |             |         |               |                            |
| A:MET303   | H           | 2.09588 | Hydrogen Bond | Conventional Hydrogen Bond |
| A:SER199   | O           | 2.15246 | Hydrogen Bond | Conventional Hydrogen Bond |

|            |             |         |             |           |
|------------|-------------|---------|-------------|-----------|
| A:LEU152   | C-H         | 3.75542 | Hydrophobic | Pi-Sigma  |
| A:MET374   | Sulfur      | 5.14397 | Other       | Pi-Sulfur |
| A:MET446   | Sulfur      | 5.58993 | Other       | Pi-Sulfur |
| A:ILE133   | Pi-Orbitals | 4.80249 | Hydrophobic | Pi-Alkyl  |
| A:CYS437   | Pi-Orbitals | 5.08104 | Hydrophobic | Pi-Alkyl  |
| A:ALA306   | Pi-Orbitals | 4.38019 | Hydrophobic | Pi-Alkyl  |
| A:ALA307   | Pi-Orbitals | 4.55999 | Hydrophobic | Pi-Alkyl  |
| <b>D17</b> |             |         |             |           |
| A:LEU152   | C-H         | 3.69749 | Hydrophobic | Pi-Sigma  |
| A:MET374   | Sulfur      | 5.12605 | Other       | Pi-Sulfur |
| A:MET446   | Sulfur      | 5.61916 | Other       | Pi-Sulfur |
| A:ILE133   | Pi-Orbitals | 4.78448 | Hydrophobic | Pi-Alkyl  |
| A:CYS437   | Pi-Orbitals | 5.0598  | Hydrophobic | Pi-Alkyl  |
| A:ALA306   | Pi-Orbitals | 4.42012 | Hydrophobic | Pi-Alkyl  |
| A:ALA307   | Pi-Orbitals | 4.64893 | Hydrophobic | Pi-Alkyl  |
| <b>D18</b> |             |         |             |           |
| A:LEU152   | C-H         | 3.69301 | Hydrophobic | Pi-Sigma  |

|            |             |         |               |                            |
|------------|-------------|---------|---------------|----------------------------|
| A:MET374   | Sulfur      | 5.16266 | Other         | Pi-Sulfur                  |
| A:CYS437   | Sulfur      | 4.72024 | Other         | Pi-Sulfur                  |
| A:ALA307   | Alkyl       | 3.744   | Hydrophobic   | Alkyl                      |
| A:MET446   | Alkyl       | 4.75034 | Hydrophobic   | Alkyl                      |
| A:ILE133   | Pi-Orbitals | 5.02984 | Hydrophobic   | Pi-Alkyl                   |
| A:ALA306   | Pi-Orbitals | 4.20068 | Hydrophobic   | Pi-Alkyl                   |
| A:ALA307   | Pi-Orbitals | 5.08251 | Hydrophobic   | Pi-Alkyl                   |
| A:PHE203   | Pi-Orbitals | 4.77675 | Hydrophobic   | Pi-Alkyl                   |
| <b>D19</b> |             |         |               |                            |
| A:THR310   | H           | 3.02233 | Hydrogen Bond | Conventional Hydrogen Bond |
| A:ALA306   | H           | 2.77767 | Hydrogen Bond | Conventional Hydrogen Bond |
| A:THR310   | H           | 1.94013 | Hydrogen Bond | Conventional Hydrogen Bond |
| A:THR310   | C-H         | 3.65298 | Hydrophobic   | Pi-Sigma                   |
| A:MET374   | Sulfur      | 5.15383 | Other         | Pi-Sulfur                  |
| A:ALA443   | Alkyl       | 3.38822 | Hydrophobic   | Alkyl                      |
| A:MET446   | Alkyl       | 5.45268 | Hydrophobic   | Alkyl                      |
| A:VAL370   | Pi-Orbitals | 5.18741 | Hydrophobic   | Pi-Alkyl                   |

|            |             |         |             |               |
|------------|-------------|---------|-------------|---------------|
| A:LEU152   | Pi-Orbitals | 5.14384 | Hydrophobic | Pi-Alkyl      |
| A:ALA306   | Pi-Orbitals | 4.52294 | Hydrophobic | Pi-Alkyl      |
| A:ALA307   | Pi-Orbitals | 4.29137 | Hydrophobic | Pi-Alkyl      |
| <b>D20</b> |             |         |             |               |
| A:LEU152   | C-H         | 3.87865 | Hydrophobic | Pi-Sigma      |
| A:MET446   | Sulfur      | 5.88582 | Other       | Pi-Sulfur     |
| A:PHE134   | Pi-Orbitals | 5.05611 | Hydrophobic | Pi-Pi Stacked |
| A:ILE133   | Pi-Orbitals | 4.78005 | Hydrophobic | Pi-Alkyl      |
| A:CYS437   | Pi-Orbitals | 5.01985 | Hydrophobic | Pi-Alkyl      |
| A:ALA306   | Pi-Orbitals | 4.11183 | Hydrophobic | Pi-Alkyl      |
| A:ALA307   | Pi-Orbitals | 4.65537 | Hydrophobic | Pi-Alkyl      |
| A:MET374   | Pi-Orbitals | 5.12173 | Hydrophobic | Pi-Alkyl      |



**ADMET predictions of D19 molecule:**

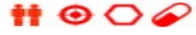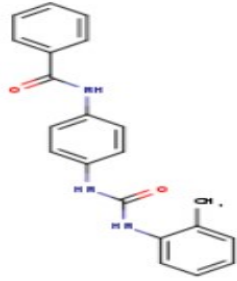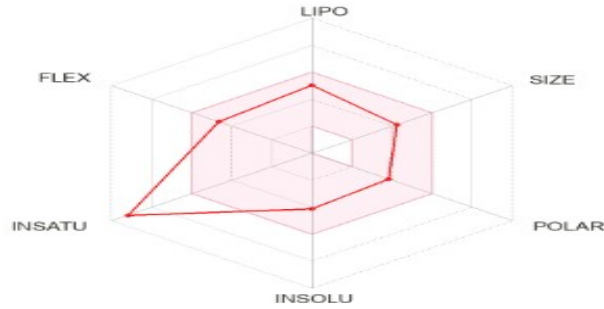

SMILES O=C(Nc1ccccc1C)Nc1ccc(cc1)NC(=O)c1ccccc1

#### Physicochemical Properties

|                           |                                                               |
|---------------------------|---------------------------------------------------------------|
| Formula                   | C <sub>21</sub> H <sub>19</sub> N <sub>3</sub> O <sub>2</sub> |
| Molecular weight          | 345.39 g/mol                                                  |
| Num. heavy atoms          | 26                                                            |
| Num. arom. heavy atoms    | 18                                                            |
| Fraction Csp <sup>3</sup> | 0.05                                                          |
| Num. rotatable bonds      | 7                                                             |
| Num. H-bond acceptors     | 2                                                             |
| Num. H-bond donors        | 3                                                             |
| Molar Refractivity        | 104.34                                                        |
| TPSA                      | 70.23 Å <sup>2</sup>                                          |

#### Lipophilicity

|                                          |      |
|------------------------------------------|------|
| Log <i>P</i> <sub>o/w</sub> (iLOGP)      | 2.73 |
| Log <i>P</i> <sub>o/w</sub> (XLOGP3)     | 3.30 |
| Log <i>P</i> <sub>o/w</sub> (WLOGP)      | 4.32 |
| Log <i>P</i> <sub>o/w</sub> (MLOGP)      | 3.84 |
| Log <i>P</i> <sub>o/w</sub> (SILICOS-IT) | 3.05 |
| Consensus Log <i>P</i> <sub>o/w</sub>    | 3.45 |

#### Water Solubility

|                    |                    |
|--------------------|--------------------|
| Log S (ESOL)       | -4.11              |
| Solubility Class   | Moderately soluble |
| Log S (Ali)        | -4.45              |
| Solubility Class   | Moderately soluble |
| Log S (SILICOS-IT) | -7.83              |
| Solubility Class   | Poorly soluble     |

#### Pharmacokinetics

|                                             |            |
|---------------------------------------------|------------|
| GI absorption                               | High       |
| BBB permeant                                | Yes        |
| P-gp substrate                              | No         |
| CYP1A2 inhibitor                            | Yes        |
| CYP2C19 inhibitor                           | Yes        |
| CYP2C9 inhibitor                            | Yes        |
| CYP2D6 inhibitor                            | Yes        |
| CYP3A4 inhibitor                            | Yes        |
| Log <i>K</i> <sub>p</sub> (skin permeation) | -6.06 cm/s |

#### Druglikeness

|                       |                  |
|-----------------------|------------------|
| Lipinski              | Yes; 0 violation |
| Ghose                 | Yes              |
| Veber                 | Yes              |
| Egan                  | Yes              |
| Muegge                | Yes              |
| Bioavailability Score | 0.55             |

#### Medicinal Chemistry

|                         |         |
|-------------------------|---------|
| PAINS                   | 0 alert |
| Brenk                   | 0 alert |
| Leadlikeness            | Yes     |
| Synthetic accessibility | 2.15    |

Toxicity prediction:

| ID              | Value      |
|-----------------|------------|
| algae_at        | 0.0212129  |
| Ames_test       | mutagen    |
| Carcino_Mouse   | positive   |
| Carcino_Rat     | positive   |
| daphnia_at      | 0.0310858  |
| hERG_inhibition | high_risk  |
| medaka_at       | 0.00205667 |
| minnow_at       | 0.00386286 |
| TA100_10RLI     | positive   |
| TA100_NA        | negative   |
| TA1535_10RLI    | negative   |
| TA1535_NA       | negative   |
